# Supplementary material for: CcrZ is a pneumococcal spatiotemporal cell cycle regulator that interacts with FtsZ and controls DNA replication by modulating the activity of DnaA
Source: PubMed Central journal article supplement (PMC8387234; doi:10.1038/s41564-021-00949-1), 2021-08-09
Supplement: 41564_2021_949_MOESM1_ESM.pdf [file 41564_2021_949_MOESM1_ESM.pdf]

---

**Supplementary information**

---

**CcrZ is a pneumococcal spatiotemporal cell cycle regulator that interacts with FtsZ and controls DNA replication by modulating the activity of DnaA**

---

In the format provided by the authors and unedited

## Supplementary Information

# **CcrZ is a pneumococcal spatio-temporal cell cycle regulator that interacts with FtsZ and controls DNA replication by modulating the activity of DnaA**

Clement Gallay, Stefano Sanselicio, Mary E. Anderson, Young Min Soh, Xue Liu, Gro A. Stamsås, Simone Pelliciani, Renske van Raaphorst, Julien Dénéréaz, Morten Kjos, Heath Murray, Stephan Gruber, Alan D. Grossman, Jan-Willem Veening

### Contents:

#### Supplementary Videos legends

1. 3D-SIM of GFP-CcrZ in wild type cells.
2. Time lapse microscopy of GFP-CcrZ in live cells.
3. Time lapse analysis of GFP-CcrZ and FtsZ-mCherry in live cells.
4. 3D-SIM of GFP-CcrZ and FtsZ-mCherry in wild type cells.
5. Time lapse microscopy of CcrZ-mKate2 in FtsZ depleted cells.
6. Time lapse analysis of HlpA-mKate2 in  $\Delta ccrZ$  cells.
7. Time lapse microscopy of FtsZ-mTurquoise2 in DnaA<sup>TS</sup> following temperature shift.
8. Time lapse analysis of CcrZ-mKate2, DnaN-sfTQ<sup>OX</sup> and ParB<sub>p</sub>-sfmYFP in live cells.

#### Supplementary Methods: Strains construction

#### Supplementary Tables 1-4

1. Strains and plasmids used in this study
2. Oligonucleotides used in this study
3. Ratio of spectral counts between GFP-CcrZ and GFP from LC-MS/MS
4. CRISPRi-seq results for *ccrZ*-complementation vs *ccrZ*-depletion

#### Supplementary References

**Supplementary Video 1: 3D-SIM of GFP-CcrZ in wild type cells.**

Volume projection of 240 reconstructed 3D-SIM images from a chain of four live *S. pneumoniae* cells expressing msfGFP-CcrZ shows CcrZ forming patchy rings.

**Supplementary Video 2: Time lapse microscopy of GFP-CcrZ in live cells.**

Localization overtime of msfGFP-CcrZ (green) at 30°C overlaid with phase contrast (gray) shows that CcrZ localizes exclusively at the division site overtime. Time interval: 10 min. Scale bar: 3 µm.

**Supplementary Video 3: Time lapse analysis of GFP-CcrZ and FtsZ-mCherry in live cells.**

Localization of msfGFP-CcrZ (green) and FtsZ-mCherry (red) overlaid with phase contrast (gray) at 30°C shows that CcrZ and FtsZ co-localize overtime. Time interval: 10 min. Scale bar: 3 µm.

**Supplementary Video 4: 3D-SIM of GFP-CcrZ and FtsZ-mCherry in wild type cells.**

Volume projection of 240 reconstructed 3D-SIM images of a chain of four *S. pneumoniae* cells shows that msfGFP-CcrZ (green) and FtsZ-mCherry (red) form a similar ring structure and co-localize.

**Supplementary Video 5: Time lapse microscopy of CcrZ-mKate2 in FtsZ depleted cells.**

Depletion of FtsZ overtime shows a rapid spread of CcrZ-mKate2 (red) signal in the cytoplasm. Cells are visualized by phase contrast (grey). Time interval: 10 min. Scale bar: 3 µm.

**Supplementary Video 6: Time lapse analysis of HlpA-mKate2 in  $\Delta ccrZ$  cells.**

Localization overtime of HlpA-mKate2 (red) used as a chromosomal marker in live *ccrZ*-deleted cells shows absence of nucleus and “guillotined” chromosome in several cells visualized by phase contrast (grey). Time interval: 5 min. Scale bar: 3 µm.

**Supplementary Video 7: Time lapse microscopy of FtsZ-mTurquoise2 in DnaA<sup>TS</sup> following temperature shift.**

Localization overtime of FtsZ-mTurquoise2 (cyan) in DnaA<sup>TS</sup> when cells are grown at 40°C following a pre-incubation at 30°C shows a delocalization of FtsZ after roughly four to five generations. Cells are visualized by phase contrast (grey). Time interval: 15 min. Scale bar: 3 µm.

**Supplementary Video 8: Time lapse analysis of CcrZ-mKate2, DnaN-sfTQ<sup>OX</sup> and ParB<sub>p</sub>-sfmYFP in live cells.**

Localization overtime of CcrZ-mKate2 (red, marked by red arrows), DnaN-sfTQ<sup>OX</sup> (cyan, marked by cyan arrows) and ParB<sub>p</sub>-sfmYFP (yellow, marked by yellow arrows) overlaid with phase contrast (grey) shows that the origin of replication is first brought to the future division site, while the replication machinery localizes at mid-cell with CcrZ, until CcrZ re-localizes to the new division site to start a new round of replication. Time interval: 2 min 30 sec. Scale bar: 1.5 µm.

## Supplementary Methods

### Strains constructions

All strains and plasmids used for constructions are listed in Supplementary Table 1 and all primers are listed in Supplementary Table 2.

All *S. pneumoniae* strains were constructed by integrating into the chromosome by double homologous recombination either circular plasmids or linear DNA fragments possessing two ~1 kb region homology assembled using standard restriction-ligation, PCR assembly, Gibson assembly or Golden Gate assembly. In all cases parental strains were transformed directly with the assembled products. Constructs were confirmed by PCR and the resulting fragment sequenced.

*P<sub>Zn</sub>-ccrZ<sup>+/+</sup>* and *ccrZ<sup>+/+</sup>*. For insertion of a second copy of *spv\_0476* (*ccrZ*) under control of either *P<sub>Zn</sub>* or *P<sub>lac</sub>*, *spv\_0476* with its native RBS was amplified by PCR from D39V genome with primers 1/2 or 1/9 respectively and cloned into pMK11 vector<sup>1</sup> between EcoRI-SpeI restriction sites allowing for the genetic fusion *P<sub>Zn</sub>-spv\_0476* to be inserted in place of *bgaA* (coding for β-galactosidase) locus, or cloned into pPEPY<sup>2</sup> between EcoRI-BamHI sites to obtain the genetic fusion *P<sub>lac</sub>-spv\_0476* for insertion in place of the *cil* locus (chromosomal integration locus – disrupting the non-coding *spv\_2165* gene). pMK11-*spv\_0476* was then transformed into D39V wild type and pPEPY-*spv\_0476* into D39V *lacI<sup>3</sup>* as this strains expresses constitutively the repressor LacI.

*P<sub>Zn</sub>-ccrZ<sup>+/+</sup>* and *ccrZ<sup>+/+</sup>*. For deletions of *spv\_0476*, both flanking regions of the gene were amplified by PCR on D39V genome with primers 3/4 and 5/6 and assembled using Gibson assembly<sup>4</sup> to an erythromycin resistant marker amplified from a strain *ftsZ-mKate2-ery<sup>1</sup>* with primers 7/8. The final product was transformed into *P<sub>Zn</sub>-ccrZ<sup>+/+</sup>* strain in presence of ZnCl<sub>2</sub> in order to express the extra copy of *ccrZ*. The resulting *ccrZ::ery* product together with the flanking regions was amplified from the *P<sub>Zn</sub>-ccrZ<sup>+/+</sup>* genome with primers 10/11 and transformed into *ccrZ<sup>+/+</sup>* in presence of IPTG.

*ftsZ-spc* and *ftsZ-mTurquoise2*. The spectinomycin resistance marker *spc* was amplified by PCR from plasmid pPEP23<sup>5</sup> with primers 16/17, *ftsZ* and flanking regions were amplified on D39V genome with primers 12/13 and 14/15. All three fragments were assembled using Golden Gate assembly with BsmBI<sup>6</sup> and the resulting product transformed into D39V wild type. *mTurquoise2* was amplified from vector mTurquoise2-pBAD (addgene) with primers 19/20, *ftsZ-linker* was amplified from *ftsZ-mKate2* strain<sup>1</sup> with primers 12/18 and downstream flanking region of *ftsZ* with *spc* amplified on *ftsZ-spc* genome with primers 15/21. All three fragments were assembled using Golden Gate assembly (BsmBI) and transformed into D39V wild type in order to replace the native *ftsZ* with *ftsZ-mTurquoise2-ery* fusion.

*ccrZ<sup>+/+</sup> ftsZ-mTurquoise2* and *dnaA<sup>TS</sup> mTurquoise2*. *ftsZ-mTurquoise2* genetic fusion and flanking regions were amplified by PCR with primers 12/15 from *ftsZ-mTurquoise2* strain and inserted either into *ccrZ<sup>+/+</sup>* strain in presence of IPTG to keep high levels of CcrZ (*ccrZ<sup>+/+</sup> ftsZ-mTurquoise2*) or into the thermosensitive *dnaA* mutant *dnaA<sup>TS</sup> 7* (*dnaA<sup>TS</sup> mTurquoise2*).

*ccrZ<sup>+/+</sup> ΔtrmB*. For co-deletion of *ccrZ* and *trmB* (same operon and overlapping), upstream region of *ccrZ* was amplified by PCR on D39V genome with primers 22/23, erythromycin resistance marker was

amplified with primers 24/25 on *ccrZ*<sup>+/+</sup> genome and downstream region of *trmB* was amplified on D39V genome with primers 26/27. All three fragments were assembled using Golden Gate (BsaI) and inserted into strain *ccrZ*<sup>+/+</sup> in presence of IPTG.

*P<sub>Zn</sub>-ccrZ-gfp*, *P<sub>Zn</sub>-ftsZ-gfp*, *P<sub>Zn</sub>-gfp-ccrZ*, R6 *P<sub>Zn</sub>-gfp-ccrZ* and TIGR4 *P<sub>Zn</sub>-gfp-ccrZ*. For translational fusion of monomeric superfolder green fluorescent protein (msfGFP) at the C-terminal extremities of CcrZ and FtsZ, *ccrZ* and *ftsZ* together with their respective RBS were amplified by PCR on D39V genome with primers 28/29 and 30/31, respectively, and cloned into plasmid pMK17<sup>1</sup> between restriction sites NotI-SpeI, allowing for insertion of fusion *ccrZ-gfp* or *ftsZ-gfp* under control of *P<sub>Zn</sub>* at the *bgaA* locus. The final product was then transformed into D39V wild type, R6<sup>8</sup> and TIGR4<sup>9</sup>. For translational fusion of msfGFP at the N-terminal extremity of CcrZ (as *ccrZ* 3' region overlaps with *trmB* 5' region), *ccrZ* excluding the START codon and including STOP codon was first amplified by PCR from D39V genome with primers 32/33 and cloned into pCG6<sup>3</sup> between restriction sites SpeI-NotI, allowing for genetic fusion of *msfgfp* to the 5' of *ccrZ* under control of *P<sub>Zn</sub>*. pCG6 derives from pMK17 and can therefore integrate into the *bgaA* locus. D39V wild type was then transformed with the final product.

*gfp-ccrZ* and *gfp-ccrZftsZ-mCherry*. *gfp-ccrZ* fragment was amplified by PCR from *P<sub>Zn</sub>-gfp-ccrZ* strain with primers 37/38, upstream flanking region was amplified with primers 34/35 from D39V genome and a kanamycin marker was amplified with primers 36/39 from pPEP2K1<sup>10</sup>. All three fragments were assembled by Gibson assembly and transformed into D39V wild type resulting in strain *gfp-ccrZ*, with *gfp-ccrZ* fusion in place of native *ccrZ* and under control of the native *P<sub>ccrZ</sub>* promoter. For co-localization of CcrZ with FtsZ, *ftsZ-mCherry* was amplified by PCR with primers 12/15 from *ftsZ-mCherry* strain<sup>1</sup> and transformed into *gfp-ccrZ* strain.

*ftsZ*<sup>+/+</sup> and *ftsZ*<sup>+/+</sup>. For insertion of an inducible ectopic version of *ftsZ*, *ftsZ* gene was amplified from D39V genome by PCR with primers 40/41 and cloned into vector pPEPY between EcoRI and BamHI restriction sites. D39V *lacI* was then transformed with the ligated product, leading to insertion of *P<sub>lac</sub>-ftsZ* in the *cil* locus. Spectinomycin marker together with *ftsZ* downstream region were amplified with primers 15/42 from strain *ftsZ-spc* and the region upstream of *ftsZ* START codon was amplified by PCR from D39V genome with primers 43/44. Both fragments were assembled using Golden Gate assembly (BsmBI) and the strain *ftsZ*<sup>+/+</sup> was transformed with the resulting product in presence of IPTG, to keep a high level of FtsZ, leading to the depletion strain *ftsZ*<sup>+/+</sup>.

*ccrZ-mKate2* and *ftsZ*<sup>+/+</sup> *ccrZ-mKate2*. For genetic fusion of *ccrZ* with the fluorescent protein mKate2, *ccrZ* upstream and downstream regions were amplified by PCR with primers 45/46 and 49/50, respectively, from D39V genome and *mKate2-ery* (with linker) was amplified with primers 47/48 from *ftsZ-mKate2* strain. All three fragments were assembled by Golden Gate assembly (BsmBI) and the product transformed into D39V wild type. *ccrZ-mKate2* was then amplified by PCR from the previously created strain with primers 50/51 and the product transformed into *ftsZ*<sup>+/+</sup> strain in presence of IPTG to keep a high level of FtsZ.

*ccrZ-LgBit*. In order to fuse *ccrZ* to *LgBit* sequence in place of the native *ccrZ*, upstream region of *ccrZ* was amplified by PCR with primers 52/53 and the downstream region together with erythromycin marker was amplified with primers 54/55 on strain *ccrZ-mKate2*. A gBlocks fragment (Integrated DNA

Technologies) containing the *LgBit* sequence flanked with two BsaI sites was synthesised. Both PCR fragments and gBlocks were assembled using Golden Gate assembly (BsaI) and inserted into D39V wild type by transformation.

*ftsZ-SmBit* and *ccrZ-LgBit ftsZ-SmBit*. For fusion of *ftsZ* with *SmBit* sequence, *SmBit* sequence was synthesized as a gBlocks fragment (Integrated DNA Technologies) and amplified by PCR with primers 56/57. *ftsZ* with its upstream region sequence were amplified with primers 58/59 on D39V genome and the downstream region with spectinomycin marker were amplified with primers 60/61 on strain *ftsZ-spc*. All three fragments were then assembled with Golden Gate assembly (BsmBI) and transformed into D39V wild type and *ccrZ-LgBit* strains.

*ccrZ-SmBit* and *ccrZ-LgBit ccrZ-SmBit*. For *ccrZ-SmBit* construction, *ccrZ* upstream and downstream regions were amplified by PCR with primers 62/63 and 66/67, respectively, on D39V gDNA and *SmBit* was amplified with primers 64/65 from strain *ftsZ-SmBit*. All three fragments were assembled with Golden Gate assembly (BsmBI) and the product was transformed into strain D39V wild type. *ccrZ-SmBit* was then amplified by PCR with primers 70/67 from the resulting strain and *ccrZ-LgBit*, with upstream region was amplified with primers 68/69 from strain *ccrZ-LgBit*. The two fragments obtained were assembled by Golden Gate assembly (BsmBI) and transformed into D39V wild type.

*ccrZ-LgBit cps2E-SmBit*, *ccrZ-LgBit hlpA-SmBit*, *ccrZ-LgBit dnaA-SmBit*, *ccrZ-LgBit ezrA-SmBit*, *ccrZ-LgBit ftsA-SmBit*, *ccrZ-LgBit ftsH-SmBit*, *ccrZ-LgBit ftsW-SmBit*, *ccrZ-LgBit pepN-SmBit*, *ccrZ-LgBit pbp2x-SmBit*, *ccrZ-LgBit zapA-SmBit*, *ccrZ-LgBit fruA-SmBit*, *ccrZ-LgBit plsC-SmBit*, *ccrZ-LgBit scrA-SmBit* and *ccrZ-LgBit spv\_1621-SmBit*. All fourteen double *LgBit-SmBit* labeled strains were constructed as followed. *SmBit* fragment was amplified by PCR from *ftsZ-SmBit* genome with primers 71/72 when using BsmBI and 73/74 when using BsaI (for *dnaA-SmBit* and *ezrA-SmBit*). *cps2E*, *hlpA*, *dnaA*, *ezrA*, *ftsA*, *ftsH*, *ftsW*, *pepN*, *pbp2x*, *zapA*, *fruA*, *plsC*, *scrA* and *spv\_1621* upstream (of Start codon) regions were amplified from D39V genome with primers 75/76, 79/80, 83/84, 87/88, 91/92, 95/96, 99/100, 103/104, 107/108, 111/112, 115/116, 119/120, 123/124 and 127/128, respectively, and downstream regions were amplified from D39V genome with primers 77/78, 81/82, 85/86, 89/90, 93/94, 97/98, 101/102, 105/106, 109/110, 113/114, 117/118, 121/122, 125/126 and 129/130, respectively. Each downstream and upstream fragment was assembled to *SmBit* fragment using Golden Gate assembly (BsmBI for all except *dnaA* and *ezrA* using BsaI) and transformed into strain *ccrZ-LgBit*.

*hlpA-LgBit* and *hlpA-LgBit hlpA-SmBit*. For construction of the final strain *hlpA-LgBit hlpA-SmBit* used as positive control for SplitLuc assay as HlpA proteins interact together<sup>11</sup>, a first strain *hlpA-LgBit* was made as followed. *PrsI* upstream region was amplified by PCR with primers 131/132 on strain VL2429 (Veening lab collection) and fragment *LgBit* fuse to chloramphenicol resistant marker, together with *prsI* downstream region was amplified with primers 135/136 from strain VL2429. *hlpA* was amplified with primers 133/134 from D39V genome. All three fragments were assembled by overlapping PCR using primers 131/136 and transformed into D39V wild type. *hlpA-SmBit* was amplified from strain *ccrZ-LgBit hlpA-SmBit* with primers 79/82 and transformed into the previously created strain *hlpA-LgBit*, leading to strain *hlpA-LgBit hlpA-SmBit*.

*P<sub>lac</sub>-dnaA-SmBit*. For insertion of *dnaA* fused to *SmBit* under control of *P<sub>lac</sub>* promoter, plasmid pPEPZ<sup>2</sup> was amplified by PCR with primers 222/223 (upstream) and 224/225 (downstream) and *dnaA-SmBit* was amplified by PCR with primers 226/227 from strain *ccrZ-LgBit dnaA-SmBit*. All three fragments were assembled using Golden Gate (BsmBI) and inserted into D39V *lacI* strain, allowing for insertion of *P<sub>lac</sub>-dnaA-SmBit* into the *zip* locus (pPEPZ integration platform - causing disruption of the non-coding gene *spv\_2417*).

*P<sub>lac</sub>-dnaA-SmBit yabA-LgBit* and *yabA-LgBit*. For fusion of *yabA* with *LgBit*, *LgBit* fragment was amplified by PCR with primers 228/229 from strain *ccrZ-LgBit* and *yabA* together with upstream and downstream regions were amplified with primers 230/231 and 232/233 respectively. All three fragments were assembled using Golden Gate (BsmBI) and inserted into strain *P<sub>lac</sub>-dnaA-SmBit* and D39V, leading to strains *P<sub>lac</sub>-dnaA-SmBit yabA-LgBit* and *yabA-LgBit*.

*yabA-LgBit ccrZ-SmBit*. *ccrZ-SmBit* fragment, containing upstream and downstream regions, was amplified from *ccrZ-SmBit* strain using primers 62/67 and transformed into strain *yabA-LgBit*, resulting in strain *yabA-LgBit ccrZ-SmBit*.

*hlpA-mKate2 ΔccrZ. ccrZ::ery* fragment was amplified by PCR with primers 10/11 on strain *ccrZ<sup>+/+</sup>* and transformed into *hlpA-mKate2* strain<sup>1</sup>.

*P<sub>Zn</sub>-ccrZ<sup>+/+</sup> ftsZ-cfp*, *P<sub>Zn</sub>-ccrZ<sup>+/+</sup> ftsZ-cfp hlpA-mKate2* and *P<sub>Zn</sub>-ccrZ<sup>+/+</sup> ftsZ-cfp hlpA-mKate2. ftsZ-cfp* was amplified from *ftsZ-cfp* strain<sup>1</sup> by PCR with primers 12/15 and transformed into strain *P<sub>Zn</sub>-ccrZ<sup>+/+</sup>* leading to strain *P<sub>Zn</sub>-ccrZ<sup>+/+</sup> ftsZ-cfp. hlpA-mKate2* was amplified by PCR from strain *hlpA-mKate2<sup>1</sup>* with primers 137/138 and the resulting fragment was used for transformation of strain *P<sub>Zn</sub>-ccrZ<sup>+/+</sup> ftsZ-cfp*. The newly created strain *P<sub>Zn</sub>-ccrZ<sup>+/+</sup> ftsZ-cfp hlpA-mKate2* was then transformed in presence of IPTG with *ccrZ::ery* fragment amplified by PCR with primers 10/11 on strain *ccrZ<sup>+/+</sup>*, resulting in strain *P<sub>Zn</sub>-ccrZ<sup>+/+</sup> ftsZ-cfp hlpA-mKate2*.

*ccrZ<sup>supp1</sup>*, *ccrZ<sup>supp2</sup>* and *ccrZ<sup>supp3</sup>*. The deletion fragment *ccrZ::ery* was amplified by PCR with primers 10/11 on strain *ccrZ<sup>+/+</sup>* and inserted in place of *ccrZ* in strain D39V wild type. Among the 10,000 colonies appearing on erythromycin-agar plates, 200 colonies were as large as wild type colony, while nearly 9,800 were very small colonies. 3 large colonies were cultivated, and their growth was assessed by plate-reader assay, before to be stored at -80°C. Mutation determination is described in *Genome resequencing of ccrZ suppressors by NGS* section. *ccrZ<sup>supp1</sup>* has a 741G>T substitution leading to DnaA-Q247H and an additional insertion 13\_14insA into *licD2*; *ccrZ<sup>supp2</sup>* has a 874G>T substitution leading to DnaA-S292G; and *ccrZ<sup>supp3</sup>* had a 277G>T substitution leading to YabA E93\* (insertion of STOP codon).

*ΔccrZ dnaA-Q247H* and *ΔccrZ dnaA-S292G*. For re-insertion of the two *dnaA* point mutations in wild type background, fragments corresponding to *dnaA-Q247H* and *dnaA-S292G* with flanking region (marker-less) were first constructed by PCR assembly. The fragment corresponding to *dnaA-Q247H*\_up was amplified on D39V genome with primers 143/140 and *dnaA-Q247H*\_down was amplified with primers 139/144; a final PCR with primers 143/144 using both fragments as template led to the final *dnaA-Q247H* product. *dnaA-S292G* fragment was constructed in the same way using primers 143/142 and 141/144. Either assemblies were then inserted into D39V wild type, together with the deletion fragment *ccrZ::ery* (amplified

by PCR with primers 10/11 on strain *ccrZ*<sup>+/+</sup>, allowing for selection. In both cases, small colonies with few large colonies (2%) were present and only the large colonies were selected for confirmation by PCR and sequencing.

*kan-ccrZ*, *dnaA-Q247H* and *dnaA-S292G*. In order to re-insert *ccrZ* into strain  $\Delta$ *ccrZ dnaA-Q247H* and  $\Delta$ *ccrZ dnaA-S292G*, a strain *kan-ccrZ* was constructed as intermediate. The upstream region of *ccrZ*, together with *kan* (kanamycin resistant marker), was amplified by PCR on strain *gfp-ccrZ* with primers 45/145 and *ccrZ* gene was amplified with primers 146/11 on D39V genome. Both fragments were then assembled using Golden Gate assembly (BsmBI) and inserted into D39V wild type. *kan-ccrZ* fragment was amplified by PCR from the resulting strain *kan-ccrZ* with primers 22/55. Strains  $\Delta$ *dnaA Q247H* and  $\Delta$ *dnaA S292G* were then transformed with the obtained DNA fragments and selected for kanamycin resistance, allowing for replacement of *ccrZ::ery* with *kan-ccrZ*.

$\Delta$ *yabA* and  $\Delta$ *yabA*  $\Delta$ *ccrZ*. For *yabA* deletion, sequences upstream and downstream of *yabA* were amplified on D39V genome by PCR with primers 147/148 and 151/152, respectively, and spectinomycin resistance marker was amplified on pPEP23 with primers 149/1509. All fragments were then assembled using Golden Gate assembly (BsmBI) and inserted into D39V wild type.  $\Delta$ *yabA* strain was then transformed with a fragment *ccrZ::ery* amplified by PCR with primers 10/11 on strain *ccrZ*<sup>+/+</sup> resulting in strain  $\Delta$ *yabA*  $\Delta$ *ccrZ*.

*ccrZ-N164A*, *ccrZ-H157A* and *ccrZ-D177A*. Insertion of *ccrZ* point mutations into *P<sub>Zn</sub>-ccrZ*<sup>+/+</sup> strain was performed as followed. For *ccrZ-N164A*, *kan-ccrZ<sub>up</sub>* was amplified on *kan-ccrZ* genome with primers 45/154 and *ccrZ<sub>down</sub>* was amplified with primers 153/11 on D39V genome. Both fragments were assembled by PCR assembly using primers 45/11. *ccrZ-H157A* and *ccrZ-D177A* were constructed in a similar manner, with primers 45/156, 155/11, 45/158 and 157/11 respectively. All three assembled products were then inserted into strain *P<sub>Zn</sub>-ccrZ*<sup>+/+</sup> in presence of ZnCl<sub>2</sub> in order to keep high CcrZ levels.

*P<sub>lac</sub>-ccrZ-gfp*, *P<sub>lac</sub>-ccrZ-H157A-gfp*, *P<sub>lac</sub>-ccrZ-N164A-gfp* and *P<sub>lac</sub>-ccrZ-D177A-gfp*. For insertion of *ccrZ* fused to *gfp* under control of *P<sub>lac</sub>* promoter, *ccrZ-gfp* was amplified from *P<sub>Zn</sub>-ccrZ-gfp* strain genome with primers 161/162 and plasmid pPEPZ<sup>2</sup> was amplified by PCR with primers 159/160. Assembly of both fragments using Golden Gate (BsmBI) and insertion into D39V *lacI* strain allowed insertion of *P<sub>lac</sub>-ccrZ-GFP* into the *zip* locus (pPEPZ integration platform - causing disruption of the non-coding gene *spv<sub>2417</sub>*). To mutate *ccrZ-gfp*, PCR assembly was used for the three mutants. For *P<sub>lac</sub>-ccrZ-H157A-gfp*, upstream of the *zip* locus together with *P<sub>lac</sub>-ccrZ<sub>up</sub>* were amplified by PCR with primers 163/156 and *ccrZ-gfp<sub>down</sub>* with downstream region of *zip* locus was amplified with primers 155/164, from *P<sub>lac</sub>-ccrZ-gfp* genome. Both fragments were assembled by PCR assembly using primers 163/164. *P<sub>lac</sub>-ccrZ-N164A-gfp* and *P<sub>lac</sub>-ccrZ-D177A-gfp* fragments were constructed in a similar manner, using primers 163/154, 153/164, 163/158 and 157/164 respectively. All three products were then inserted into strain D39V *lacI*.

*comCDE-parS<sub>p</sub> ccrZ-mKate2*, *parB<sub>p</sub>-YFP comCDE-parS<sub>p</sub> ccrZ-mKate2* and *dnaN-mTQ<sup>ox</sup> parB<sub>p</sub>-YFP comCDE-parS<sub>p</sub> ccrZ-mKate2*. In order to visualize the replication machinery together with the origin of replication and CcrZ, a first strain was made, expressing CcrZ-mKate2 and containing parS<sub>p</sub> sites from *Lactococcus lactis* (able to bind parB<sub>p</sub> proteins from *L. lactis*) in the genome close to the origin of replication *oriC*. *comCDE-parS<sub>p</sub>* was amplified by PCR from strain D39V, *comCDE-parS<sub>p</sub> bgaA::parB<sub>p</sub>-sfmGFP<sup>1</sup>*



using primers 165/166 and the resulting fragment was transformed into strain *ccrZ-mKate2*. Plasmid pMK19-02 (carrying *bgaA::P<sub>Zn</sub>-parB<sub>p</sub>-msfYFP*, Veening Lab collection ) was transformed into the resulting strain *comCDE-parS<sub>p</sub> ccrZ-mKate2*. To prevent any alteration in replication process, the genetic fusion of *dnaN* with *sfmTurquoise2<sup>ox</sup>* was introduced as a second copy downstream of the original *dnaN* gene. *dnaN* and upstream region were amplified by PCR with primers 167/168 from D39V genome, the second *dnaN* copy was amplified with primers 169/170 from D39V genome, *sfmTurquoise2<sup>ox</sup>* with linker were amplified with primers 173/174 from strain D39V, *CEP::P3-spv\_1159-sfmTurquoise2<sup>ox</sup>-opt* (Veening lab collection ), chloramphenicol resistance marker (*cam*) was amplified with primers 175/176 from *hlpA-mKate2* strain and downstream of *dnaN* was amplified with primers 171/172 from D39V genome. All five fragments were assembled using Golden Gate assembly (BsaI for the three first fragments and BsaI / SapI for the two others) and transformed into strain *parB<sub>p</sub>-YFP comCDE-parS<sub>p</sub> ccrZ-mKate2*.

*ccrZ-mKate2 P<sub>Zn</sub>-dnaA-GFP*. *dnaA* was amplified from D39V genome by PCR with primers 177/178 and the resulting fragment was digested with NotI-SpeI restriction enzymes and ligated into plasmid pMK17, allowing genetic fusion with *msfgfp* under control of ZnCl<sub>2</sub>-inducible promoter. The resulting product was transformed into strain *ccrZ-mKate2*.

*ccrZ<sub>Sa</sub><sup>sgRNA</sup>* and *ccrZ<sub>Sa</sub><sup>sgRNA</sup> P<sub>ccrZ<sub>Sa</sub></sub>-ccrZ<sub>Bs</sub>*. Inverse PCR was used to construct sgRNA-plasmid, as described previously<sup>3,12</sup>; in which the phosphorylated primer 179 was combined with gene specific forward primers containing the 20 bp targeting region as overhangs. Primer 180 was used as specific primer to construct the plasmid pCG248-sgRNA(*ccrZ<sub>Sa</sub>*). The sgRNA was designed to target the 5' end *ccrZ<sub>Sa</sub>*. For construction of the complementation plasmid pCG248-sgRNA(*ccrZ<sub>Sa</sub>*)-*P<sub>ccrZ</sub>-ccrZ<sub>Bs</sub>*, *B. subtilis ccrZ*-homolog, *ytmP* (*ccrZ<sub>Bs</sub>*), was fused to the *ccrZ<sub>Sa</sub>* promoter and integrated into plasmid pCG248-sgRNA(*ccrZ<sub>Sa</sub>*). *ccrZ<sub>Bs</sub>* was amplified from plasmid pSG3174 (pUC19-*ccrZ<sub>Bs</sub>*, see below) using primers 183/184. *ccrZ<sub>Sa</sub>* -promoter (*P<sub>ccrZ<sub>Sa</sub></sub>*) was amplified from *S. aureus* SH1000 genome using primers 181/182. Both fragments were fused in a second PCR step, using primers 181/184. The resulting fragment was digested with restriction enzymes BamHI and KpnI and ligated into plasmid pCG248-sgRNA(*ccrZ<sub>Sa</sub>*).

*P<sub>lac</sub>-gfp-ccrZ<sub>Sa</sub>*. For expression of CcrZ-GFP under control of an IPTG-inducible promoter in *S. aureus* SH1000, *ccrZ<sub>Sa</sub>* gene was amplified from genomic DNA of *S. aureus* SH1000 using primers 185/186. The fragment was digested with NcoI and BamHI and ligated into the corresponding sites of plasmid pLOW-*parB*-*msfgfp*. The resulting plasmid expressing the translational fusion CcrZ<sub>Sa</sub>-msfGFP fusion under control of an IPTG-inducible promoter was then transformed into SH1000 strain.

*P<sub>ter</sub>-dCas9, P<sub>lac</sub>-ccrZ, ΔccrZ*. A *S. pneumoniae* strain expressing lacI and tetR under control of the constitutive promoter PF6 (*prs1::PF6-lacI-tetR*) was transformed with a DNA fragment *P<sub>ter</sub>-dCas9*, amplified by PCR from strain VL2212<sup>13</sup> (D39V, *prs1::PF6-tetR, bgaA::P<sub>ter</sub>-dcas9*) with primers 219/220, that integrated in the *bgaA* region. The resulting *P<sub>ter</sub>-dCas9* strain was then transformed with a PCR fragment *P<sub>lac</sub>-ccrZ* amplified with primers 217/218 from strain *ccrZ<sup>+/+</sup>*. This fragment integrated in place of the *CIL* locus. The resulting strain *P<sub>ter</sub>-dCas9, P<sub>lac</sub>-ccrZ* was then transformed in presence of 0.1 mM IPTG with a PCR fragment *ccrZ::ery* amplified with primers 10/11 from strain *ccrZ<sup>+/+</sup>*, resulting in strain *P<sub>ter</sub>-dCas9, P<sub>lac</sub>-ccrZ, ΔccrZ*.

All *B. subtilis* strains were constructed by integrating into the chromosome by double homologous recombination using either genomic DNA or linear DNA fragments possessing two ~1 kb region homology. Assembled products were introduced into parent strains using natural transformation. Constructs were confirmed by PCR and the resulting fragment sequenced.

*1A700 Δ*ccrZ*<sub>Bs</sub>*. In frame deletion of *ccrZ* homolog in *B. subtilis*, *ytmP* (*ccrZ*<sub>Bs</sub>), was performed using Golden Gate allelic replacement strategy as described before<sup>14</sup>. Upstream homology region of *ccrZ*<sub>Bs</sub> was amplified by PCR with primers 187/188 and ligated into plasmid pUC19 (leading to pSG3174), 5' region and 3' region (including downstream homology of *ccrZ*<sub>Bs</sub>) were amplified with primers pairs 189/190 and 191/192 and ligated into plasmid pUC19 (leading to pSG3178 and pSG3177, respectively). The three resulting plasmids and plasmid pSG0682<sup>14</sup> (carrying an erythromycin resistance cassette) were assembled together with Golden Gate backbone plasmid pSG1525<sup>14</sup> and transformed into 1A700 wild type.

*ccrZ*<sub>Bs</sub>-*gfp*. For translational fusion of *ccrZ*<sub>Bs</sub> with *msfGFP*, *ccrZ*<sub>Bs</sub> (*ytmP*) was amplified by PCR with primers 193/194 and ligated into plasmid pUC19 (leading to pSG3175), *msfgfp* was amplified with primers 195/196 and ligated into plasmid pUC19 (giving pSG3179) and homology region downstream of *ccrZ*<sub>Bs</sub> was amplified with primers pair 189/190 and ligated into pUC19 (leading to pSG3176). The three plasmids obtained and plasmid pSG0682 were assembled using Golden Gate and transformed into 1A700 wild type strain.

*Δ*ccrZ*<sub>Bs</sub>*. Deletion of *ccrZ*<sub>Bs</sub> was constructed by replacing the open reading frame with a chloramphenicol resistance cassette (*cam*) by using linear Gibson assembly fragments containing ~1KB of flanking homology for *ccrZ*<sub>Bs</sub>. Upstream of *ytmP* (*ccrZ*<sub>Bs</sub>) was amplified using primers 197/198; the chloramphenicol resistance cassette was amplified from pGEM::*cat*<sup>15</sup> using primers 199/200; downstream of *ccrZ*<sub>Bs</sub> was amplified using primers 201/202.

*oriN* and *oriN Δ*ccrZ*<sub>Bs</sub>*. Strain *oriN* was constructed by introducing the heterologous origin and initiator (*oriN/repN*)<sup>16</sup> in place of *oriC* and introducing a constitutive promoter to drive expression of *dnaN*. The constitutive promoter used was Ppen<sup>17</sup> with the following sequence replacing the -10 to -35 box (5'-GTTGCATTTATTCTTAGATAGTGTAATAACT-3'). The various fragments were amplified by PCR and assembled using Gibson assembly. The fragments were amplified using the following primers and templates: upstream *dnaA* was amplified using primer 203/204, kanamycin cassette was amplified from pGK67<sup>18</sup> using primers 205/206, *oriN/repN* was amplified from pDL110<sup>16</sup> using primers 207/208, Ppen207 was amplified from CAL2072 using 209/210 and *dnaN* was amplified with primers 211/212. The assembled fragments were then transformed into strain JH642 (*oriN*) or *Δ*ccrZ*<sub>Bs</sub> (oriN Δ*ccrZ*<sub>Bs</sub>)*.

## Supplementary Table 1: Strains and plasmids used in this study

| <i>S. pneumoniae</i> strains                      | Relevant genotype                                                                                                                                                                                     | Reference                                       |
|---------------------------------------------------|-------------------------------------------------------------------------------------------------------------------------------------------------------------------------------------------------------|-------------------------------------------------|
| D39V wild type                                    | <i>S. pneumoniae</i> serotype 2                                                                                                                                                                       | 19                                              |
| R6 wild type                                      | <i>S. pneumoniae</i> D39 derivative                                                                                                                                                                   | gift from C. Grangeasse laboratory, Lyon France |
| TIGR4 wild type                                   | <i>S. pneumoniae</i> serotype 4                                                                                                                                                                       | 20                                              |
| <i>ccrZ<sup>sgRNA</sup></i>                       | D39V, <i>prs1::lacI</i> , <i>bgaA::P<sub>lac</sub>-dCas</i> , <i>CEP::P3-ccrZ-sgRNA</i> ; Gen <sup>R</sup> , Tet <sup>R</sup> , Spc <sup>R</sup>                                                      | 3                                               |
| <i>P<sub>Zn</sub>-ccrZ<sup>+/+</sup></i>          | D39V, <i>bgaA::P<sub>Zn</sub>-spv_0476</i> ; Tet <sup>R</sup>                                                                                                                                         | This study                                      |
| <i>P<sub>Zn</sub>-ccrZ<sup>+/+</sup></i>          | D39V, <i>bgaA::P<sub>Zn</sub>-spv_0476</i> , $\Delta$ <i>spd_0476</i> ; Tet <sup>R</sup> , Ery <sup>R</sup>                                                                                           | This study                                      |
| D39V <i>lacI</i>                                  | D39V, <i>prs1::lacI</i> ; Gen <sup>R</sup>                                                                                                                                                            | 3                                               |
| <i>ccrZ<sup>+/+</sup></i>                         | D39V, <i>prs1::lacI</i> , <i>cil::P<sub>lac</sub>-spv_0476</i> ; Gen <sup>R</sup> , Kan <sup>R</sup>                                                                                                  | This study                                      |
| <i>ccrZ<sup>+/+</sup></i>                         | D39V, <i>prs1::lacI</i> , <i>cil::P<sub>lac</sub>-spv_0476</i> , $\Delta$ <i>spd_0476</i> ; Gen <sup>R</sup> , Kan <sup>R</sup> , Ery <sup>R</sup>                                                    | This study                                      |
| <i>ftsZ-spc</i>                                   | D39V, <i>ftsZ-spc</i> ; Spc <sup>R</sup>                                                                                                                                                              | This study                                      |
| <i>ftsZ-mTurquoise2</i>                           | D39V, <i>ftsZ::ftsZ-mTurquoise2</i> ; Spc <sup>R</sup>                                                                                                                                                | This study                                      |
| <i>ccrZ<sup>+/+</sup> ftsZ-mTurquoise2</i>        | D39V, <i>prs1::lacI</i> , <i>cil::P<sub>lac</sub>-spv_0476</i> , $\Delta$ <i>spd_0476</i> , <i>ftsZ::ftsZ-mTurquoise2</i> ; Gen <sup>R</sup> , Kan <sup>R</sup> , Ery <sup>R</sup> , Spc <sup>R</sup> | This study                                      |
| <i>dnaA<sup>TS</sup></i>                          | D39V, <i>dnaA::dnaA-M398T</i>                                                                                                                                                                         | 7                                               |
| <i>dnaA<sup>TS</sup> ftsZ-mTurquoise2</i>         | D39V, <i>dnaA</i> thermosensitive; <i>ftsZ::ftsZ-mTurquoise2</i> ; Spc <sup>R</sup>                                                                                                                   | This study                                      |
| <i>ccrZ<sup>+/+</sup> <math>\Delta</math>trmB</i> | D39V, <i>prs1::lacI</i> , <i>cil::P<sub>lac</sub>-spv_0476</i> , <i>spv_0476-trmB::ery</i> ; Gen <sup>R</sup> , Kan <sup>R</sup> , Ery <sup>R</sup>                                                   | This study                                      |
| <i>P<sub>Zn</sub>-ccrZ-gfp</i>                    | D39V, <i>bgaA::P<sub>Zn</sub>-spv_0476-msfgfp</i> ; Tet <sup>R</sup>                                                                                                                                  | This study                                      |
| <i>P<sub>Zn</sub>-gfp-ccrZ</i>                    | D39V, <i>bgaA::P<sub>Zn</sub>-msfgfp-spv_0476</i> ; Tet <sup>R</sup>                                                                                                                                  | This study                                      |
| <i>P<sub>Zn</sub>-ftsZ-gfp</i>                    | D39V, <i>bgaA::P<sub>Zn</sub>-ftsZ-msfgfp</i> ; Tet <sup>R</sup>                                                                                                                                      | This study                                      |
| R6 <i>P<sub>Zn</sub>-gfp-ccrZ</i>                 | R6, <i>bgaA::P<sub>Zn</sub>-msfGFP-spv_0476</i> ; Tet <sup>R</sup>                                                                                                                                    | This study                                      |
| TIGR4 <i>P<sub>Zn</sub>-gfp-ccrZ</i>              | TIGR4, <i>bgaA::P<sub>Zn</sub>-msfGFP-spv_0476</i> ; Tet <sup>R</sup>                                                                                                                                 | This study                                      |
| <i>gfp-ccrZ</i>                                   | D39V, <i>spv_0476::msfgfp-spv_0476</i> ; Kan <sup>R</sup>                                                                                                                                             | This study                                      |
| <i>ftsZ-mCherry</i>                               | D39V, <i>ftsZ::ftsZ-mCherry</i> ; Kan <sup>R</sup>                                                                                                                                                    | 1                                               |
| <i>gfp-ccrZ ftsZ-mCherry</i>                      | D39V, <i>spv_0476::msfgfp-spv_0476</i> , <i>ftsZ::ftsZ-mCherry</i> ; Kan <sup>R</sup> , Ery <sup>R</sup>                                                                                              | This study                                      |
| <i>ftsZ<sup>+/+</sup></i>                         | D39V, <i>prs1::lacI</i> , <i>cil::P<sub>lac</sub>-ftsZ</i> ; Gen <sup>R</sup> , Kan <sup>R</sup>                                                                                                      | This study                                      |
| <i>ftsZ<sup>+/+</sup></i>                         | D39V, <i>prs1::lacI</i> , <i>cil::P<sub>lac</sub>-ftsZ</i> , $\Delta$ <i>ftsZ</i> ; Gen <sup>R</sup> , Kan <sup>R</sup> , Spc <sup>R</sup>                                                            | This study                                      |
| <i>ftsZ-mKate2</i>                                | D39V, <i>ftsZ::ftsZ-mKate2</i> ; Ery <sup>R</sup>                                                                                                                                                     | 1                                               |
| <i>ccrZ-mKate2</i>                                | D39V, <i>spv_0476::spv_0476-mKate2</i> ; Ery <sup>R</sup>                                                                                                                                             | This study                                      |
| <i>ftsZ<sup>+/+</sup> ccrZ-mKate2</i>             | D39V, <i>prs1::lacI</i> , <i>cil::P<sub>lac</sub>-ftsZ</i> , $\Delta$ <i>ftsZ</i> , <i>spv_0476::spv_0476-mKate2</i> ; Gen <sup>R</sup> , Spc <sup>R</sup> , Kan <sup>R</sup> , Ery <sup>R</sup>      | This study                                      |
| <i>ccrZ-LgBit</i>                                 | D39V, <i>spv_0476::spv_0476-LgBit</i> ; Ery <sup>R</sup>                                                                                                                                              | This study                                      |
| <i>ftsZ-SmBit</i>                                 | D39V, <i>ftsZ::ftsZ-SmBit</i> ; Spc <sup>R</sup>                                                                                                                                                      | This study                                      |
| <i>ccrZ-LgBit ftsZ-SmBit</i>                      | D39V, <i>spv_0476::spv_0476-LgBit</i> , <i>ftsZ::ftsZ-SmBit</i> ; Ery <sup>R</sup> , Spc <sup>R</sup>                                                                                                 | This study                                      |
| <i>ccrZ-LgBit ccrZ-SmBit</i>                      | D39V, <i>spv_0476::spv_0476-LgBit-spv_0476-SmBit</i> ; Ery <sup>R</sup> , Spc <sup>R</sup>                                                                                                            | This study                                      |
| <i>ccrZ-LgBit cps2E-SmBit</i>                     | D39V, <i>spv_0476::spv_0476-LgBit</i> , <i>cps2E::cps2E-SmBit</i> ; Ery <sup>R</sup> , Spc <sup>R</sup>                                                                                               | This study                                      |
| <i>ccrZ-LgBit hlpA-SmBit</i>                      | D39V, <i>spv_0476::spv_0476-LgBit</i> , <i>hlpA::hlpA-SmBit</i> ; Ery <sup>R</sup> , Spc <sup>R</sup>                                                                                                 | This study                                      |
| <i>ccrZ-LgBit dnaA-SmBit</i>                      | D39V, <i>spv_0476::spv_0476-LgBit</i> , <i>dnaA::dnaA-SmBit</i> ; Ery <sup>R</sup> , Spc <sup>R</sup>                                                                                                 | This study                                      |

|                                                               |                                                                                                                                                                           |                        |
|---------------------------------------------------------------|---------------------------------------------------------------------------------------------------------------------------------------------------------------------------|------------------------|
| <i>ccrZ-LgBit ezrA-SmBit</i>                                  | D39V, <i>spv_0476::spv_0476-LgBit, ezrA::ezrA-SmBit</i> ; Ery <sup>R</sup> , Spc <sup>R</sup>                                                                             | This study             |
| <i>ccrZ-LgBit ftsA-SmBit</i>                                  | D39V, <i>spv_0476::spv_0476-LgBit, ftsA::ftsA-SmBit</i> ; Ery <sup>R</sup> , Spc <sup>R</sup>                                                                             | This study             |
| <i>ccrZ-LgBit ftsH-SmBit</i>                                  | D39V, <i>spv_0476::spv_0476-LgBit, ftsH::ftsH-SmBit</i> ; Ery <sup>R</sup> , Spc <sup>R</sup>                                                                             | This study             |
| <i>ccrZ-LgBit ftsW-SmBit</i>                                  | D39V, <i>spv_0476::spv_0476-LgBit, ftsW::ftsW-SmBit</i> ; Ery <sup>R</sup> , Spc <sup>R</sup>                                                                             | This study             |
| <i>ccrZ-LgBit pepN-SmBit</i>                                  | D39V, <i>spv_0476::spv_0476-LgBit, pepN::pepN-SmBit</i> ; Ery <sup>R</sup> , Spc <sup>R</sup>                                                                             | This study             |
| <i>ccrZ-LgBit pbp2x-SmBit</i>                                 | D39V, <i>spv_0476::spv_0476-LgBit, pbp2x::pbp2x-SmBit</i> ; Ery <sup>R</sup> , Spc <sup>R</sup>                                                                           | This study             |
| <i>ccrZ-LgBit zapA-SmBit</i>                                  | D39V, <i>spv_0476::spv_0476-LgBit, zapA::zapA-SmBit</i> ; Ery <sup>R</sup> , Spc <sup>R</sup>                                                                             | This study             |
| <i>ccrZ-LgBit fruA-SmBit</i>                                  | D39V, <i>spv_0476::spv_0476-LgBit, fruA::fruA-SmBit</i> ; Ery <sup>R</sup> , Spc <sup>R</sup>                                                                             | This study             |
| <i>ccrZ-LgBit plsC-SmBit</i>                                  | D39V, <i>spv_0476::spv_0476-LgBit, plsC::plsC-SmBit</i> ; Ery <sup>R</sup> , Spc <sup>R</sup>                                                                             | This study             |
| <i>ccrZ-LgBit scrA-SmBit</i>                                  | D39V, <i>spv_0476::spv_0476-LgBit, scrA::scrA-SmBit</i> ; Ery <sup>R</sup> , Spc <sup>R</sup>                                                                             | This study             |
| <i>ccrZ-LgBit spv_1621-SmBit</i>                              | D39V, <i>spv_0476::spv_0476-LgBit, spv_1621::spv_1621-SmBit</i> ; Ery <sup>R</sup> , Spc <sup>R</sup>                                                                     | This study             |
| <i>comCDE-LgBit</i>                                           | D39V, <i>prs1::P<sub>comC-comC-comD-comE-LgBit</sub></i> ; Cam <sup>R</sup>                                                                                               | Veening Lab collection |
| <i>hlpA-LgBit</i>                                             | D39V, <i>prs1::P<sub>hlpA-hlpA-LgBit</sub></i> ; Cam <sup>R</sup>                                                                                                         | This study             |
| <i>hlpA-LgBit hlpA-SmBit</i>                                  | D39V, <i>prs1::P<sub>hlpA-hlpA-LgBit, hlpA::hlpA-SmBit</sub></i> ; Cam <sup>R</sup> , Spc <sup>R</sup>                                                                    | This study             |
| D39V <i>lacI ccrZ-LgBit</i>                                   | D39V, <i>prs1::lacI, spv_0476::spv_0476-LgBit</i> ; Ery <sup>R</sup> , Gen <sup>R</sup>                                                                                   | This study             |
| <i>ccrZ-LgBit P<sub>lac-ftsZ</sub></i>                        | D39V, <i>prs1::lacI, spv_0476::spv_0476-LgBit, cil::P<sub>lac-ftsZ</sub></i> ; Gen <sup>R</sup> , Ery <sup>R</sup> , Kan <sup>R</sup>                                     | This study             |
| <i>P<sub>lac-dnaA-SmBit</sub></i>                             | D39V, <i>prs1::lacI, zip::P<sub>lac-dnaA-SmBit</sub></i> ; Gen <sup>R</sup> , Spc <sup>R</sup>                                                                            | This study             |
| <i>P<sub>lac-dnaA-SmBit yabA-LgBit</sub></i>                  | D39V, <i>prs1::lacI, zip::P<sub>lac-dnaA-SmBit, yabA::yabA-LgBit</sub></i> ; Gen <sup>R</sup> , Spc <sup>R</sup> , Ery <sup>R</sup>                                       | This study             |
| <i>yabA-LgBit</i>                                             | D39V, <i>yabA::yabA-LgBit</i> ; Ery <sup>R</sup>                                                                                                                          | This study             |
| <i>yabA-LgBit ccrZ-SmBit</i>                                  | D39V, <i>yabA::yabA-LgBit, spv_0476::spv_0476-SmBit</i> ; Spc <sup>R</sup> , Ery <sup>R</sup>                                                                             | This study             |
| <i>P3-gfp</i>                                                 | D39V, <i>cep::P3-sfgfp</i> ; Spc <sup>R</sup>                                                                                                                             | 5                      |
| <i>hlpA-mKate2</i>                                            | D39V, <i>hlpA::hlpA-hlpA-mKate2</i> ; Cam <sup>R</sup>                                                                                                                    | 21                     |
| <i>hlpA-mKate2 ΔccrZ</i>                                      | D39V, <i>hlpA::hlpA-hlpA-mKate2; Δspd_0476</i> ; Cam <sup>R</sup> , Ery <sup>R</sup>                                                                                      | 1                      |
| <i>ftsZ-cfp</i>                                               | D39V, <i>ftsZ::ftsZ-cfp</i> ; Kan <sup>R</sup>                                                                                                                            | 1                      |
| <i>P<sub>Zn-ccrZ<sup>+/+</sup></sub> ftsZ-cfp</i>             | D39V, <i>bgaA::P<sub>Zn-spv_0476, ftsZ::ftsZ-cfp</sub></i> ; Tet <sup>R</sup> , Kan <sup>R</sup>                                                                          | This study             |
| <i>P<sub>Zn-ccrZ<sup>+/+</sup></sub> ftsZ-cfp hlpA-mKate2</i> | D39V, <i>bgaA::P<sub>Zn-spv_0476, ftsZ::ftsZ-cfp, hlpA::hlpA-hlpA-mKate2</sub></i> ; Tet <sup>R</sup> , Kan <sup>R</sup> , Cam <sup>R</sup>                               | This study             |
| <i>P<sub>Zn-ccrZ<sup>+/+</sup></sub> ftsZ-cfp hlpA-mKate2</i> | D39V, <i>bgaA::P<sub>Zn-spv_0476, ftsZ::ftsZ-cfp, hlpA::hlpA-hlpA-mKate2, Δspd_0476</sub></i> ; Tet <sup>R</sup> , Kan <sup>R</sup> , Cam <sup>R</sup> , Ery <sup>R</sup> | This study             |
| <i>ccrZ<sup>supp1</sup></i>                                   | D39V, <i>Δspd_0476, dnaA::dnaA-Q247H, 13_14insA licD2</i> ; Ery <sup>R</sup>                                                                                              | This study             |
| <i>ccrZ<sup>supp2</sup></i>                                   | D39V, <i>Δspd_0476, dnaA::dnaA-S292G</i> ; Ery <sup>R</sup>                                                                                                               | This study             |
| <i>ccrZ<sup>supp3</sup></i>                                   | D39V, <i>Δspd_0476, yabA::yabA-E93*</i> ; Ery <sup>R</sup>                                                                                                                | This study             |
| <i>ΔccrZ dnaA-Q247H</i>                                       | D39V, <i>Δspd_0476, dnaA::dnaA-Q247H</i> ; Ery <sup>R</sup>                                                                                                               | This study             |
| <i>ΔccrZ dnaA-S292G</i>                                       | D39V, <i>Δspd_0476, dnaA::dnaA-S292G</i> ; Ery <sup>R</sup>                                                                                                               | This study             |
| <i>kan-ccrZ</i>                                               | D39V, <i>spv_0476::kan-spv_0476</i> ; Kan <sup>R</sup>                                                                                                                    | This study             |
| <i>dnaA-Q247H</i>                                             | D39V, <i>spv_0476::kan-spv_0476, dnaA::dnaA-Q247H</i> ; Kan <sup>R</sup>                                                                                                  | This study             |
| <i>dnaA-S292G</i>                                             | D39V, <i>spv_0476::kan-spv_0476, dnaA::dnaA-S292G</i> ; Kan <sup>R</sup>                                                                                                  | This study             |
| <i>ΔyabA</i>                                                  | D39V, <i>ΔyabA</i> ; Spc <sup>R</sup>                                                                                                                                     | This study             |
| <i>ΔyabA ΔccrZ</i>                                            | D39V, <i>ΔyabA, Δspd_0476</i> ; Spc <sup>R</sup> , Ery <sup>R</sup>                                                                                                       | This study             |
| <i>ccrZ-N164A</i>                                             | D39V, <i>bgaA::P<sub>Zn-spv_0476, spv_0476::kan-spv_0476-N164A</sub></i> ; Tet <sup>R</sup> , Kan <sup>R</sup>                                                            | This study             |

|                                                                                          |                                                                                                                                                                                |                         |
|------------------------------------------------------------------------------------------|--------------------------------------------------------------------------------------------------------------------------------------------------------------------------------|-------------------------|
| <i>ccrZ-H157A</i>                                                                        | D39V, <i>bgaA::P<sub>Zn</sub>-spv_0476, spv_0476::kan-spv_0476-H157A</i> ; Tet <sup>R</sup> , Kan <sup>R</sup>                                                                 | This study              |
| <i>ccrZ-D177A</i>                                                                        | D39V, <i>bgaA::P<sub>Zn</sub>-spv_0476, spv_0476::kan-spv_0476-D177A</i> ; Tet <sup>R</sup> , Kan <sup>R</sup>                                                                 | This study              |
| <i>P<sub>lac</sub>-ccrZ-gfp</i>                                                          | D39V, <i>prs1::lacI, zip::P<sub>lac</sub>-spv_0476-msfgfp</i> ; Gen <sup>R</sup> , Spc <sup>R</sup>                                                                            | This study              |
| <i>P<sub>lac</sub>-ccrZ-H157A-gfp</i>                                                    | D39V, <i>prs1::lacI, zip::P<sub>lac</sub>-spv_0476-H157A-msfgfp</i> ; Gen <sup>R</sup> , Spc <sup>R</sup>                                                                      | This study              |
| <i>P<sub>lac</sub>-ccrZ-N164A-gfp</i>                                                    | D39V, <i>prs1::lacI, zip::P<sub>lac</sub>-spv_0476-N164A-msfgfp</i> ; Gen <sup>R</sup> , Spc <sup>R</sup>                                                                      | This study              |
| <i>P<sub>lac</sub>-ccrZ-D177A-gfp</i>                                                    | D39V, <i>prs1::lacI, zip::P<sub>lac</sub>-spv_0476-D177A-msfgfp</i> ; Gen <sup>R</sup> , Spc <sup>R</sup>                                                                      | This study              |
| <i>comCDE-parS<sub>p</sub> ccrZ-mKate2</i>                                               | D39V, <i>spv_0476::spv_0476-mKate2, comCDE::comCDE-parS<sub>p</sub></i> ; Ery <sup>R</sup>                                                                                     | This study              |
| <i>parB<sub>p</sub>-YFP comCDE-parS<sub>p</sub> ccrZ-mKate2</i>                          | D39V, <i>spv_0476::spv_0476-mKate2, comCDE::comCDE-parS<sub>p</sub>, bgaA::P<sub>Zn</sub>-parB<sup>p</sup>-msfYFP</i> ; Ery <sup>R</sup> , Tet <sup>R</sup>                    | This study              |
| <i>dnaN-mTQ<sup>ox</sup> parB<sub>p</sub>-YFP comCDE-parS<sub>p</sub> ccrZ-mKate2</i>    | D39V, <i>spv_0476::spv_0476-mKate2, comCDE::comCDE-parS<sub>p</sub>, bgaA::P<sub>Zn</sub>-parB<sup>p</sup>-msfYFP</i> ; Ery <sup>R</sup> , Tet <sup>R</sup> , Cam <sup>R</sup> | This study              |
| <i>comCDE-parS<sub>p</sub> parB<sub>p</sub>-GFP</i>                                      | D39V, <i>comCDE-parS<sub>p</sub> bgaA::parB<sub>p</sub>-sfmGFP</i> ; Kan <sup>R</sup>                                                                                          | 1                       |
| <i>spv_1159-mTurquoise2<sup>ox</sup></i>                                                 | D39V, <i>CEP::P3-spv_1159-sfmTurquoise2<sup>ox</sup>-opt</i> ; Spc <sup>R</sup>                                                                                                | Veening Lab collection  |
| <i>ccrZ-mKate2 P<sub>Zn</sub>-dnaA-GFP</i>                                               | D39V, <i>ccrZ::ccrZ-mKate2, bgaA::P<sub>Zn</sub>-dnaA-msfGFP</i> ; Ery <sup>R</sup> , Tet <sup>R</sup>                                                                         | This study              |
| <i>P<sub>tet</sub>-dCas9</i>                                                             | D39V, <i>prs1::PF6-lacI-tetR, bgaA::Ptet-dcas9</i> ; Gen <sup>R</sup> , Tet <sup>R</sup>                                                                                       | This study              |
| <i>P<sub>tet</sub>-dCas9, P<sub>lac</sub>-ccrZ</i>                                       | D39V, <i>prs1::PF6-lacI-tetR, bgaA::Ptet-dcas9, cil::Plac-spv_0476</i> ; Gen <sup>R</sup> , Tet <sup>R</sup> , Kan <sup>R</sup>                                                | This study              |
| <i>P<sub>tet</sub>-dCas9, P<sub>lac</sub>-ccrZ, ΔccrZ</i>                                | D39V, <i>prs1::PF6-lacI-tetR, bgaA::Ptet-dcas9, cil::Plac-spv_0476, Δspd_0476</i> ; Gen <sup>R</sup> , Tet <sup>R</sup> , Kan <sup>R</sup> , Ery <sup>R</sup>                  | This study              |
| <b>S. aureus strains</b>                                                                 |                                                                                                                                                                                |                         |
| SH1000                                                                                   | <i>S. aureus</i> SH1000                                                                                                                                                        | 22                      |
| SH1000 <i>dcas9</i>                                                                      | SH1000, <i>pLOW-dcas9</i> ; Ery <sup>R</sup>                                                                                                                                   | 12                      |
| <i>ccrZ<sub>Sa</sub><sup>sgRNA</sup></i>                                                 | SH1000, <i>pLOW-dcas9, pCG248-sgRNA(ccrZ<sub>Sa</sub>)</i> ; Ery <sup>R</sup> , Cam <sup>R</sup>                                                                               | This study              |
| <i>ccrZ<sub>Sa</sub><sup>sgRNA</sup> P<sub>ccrZ<sub>Sa</sub></sub>-ccrZ<sub>Bs</sub></i> | SH1000, <i>pLOW-dcas9, pCG248-sgRNA(ccrZ<sub>Sa</sub>)-P<sub>ccrZ<sub>Sa</sub></sub>-ccrZ<sub>Bs</sub></i> ; Ery <sup>R</sup> , Cam <sup>R</sup>                               | This study              |
| <i>P<sub>lac</sub>-gfp-ccrZ<sub>Sa</sub></i>                                             | SH1000, <i>pLOW-m(sf)gfp-ccrZ<sub>Sa</sub></i> ; Ery <sup>R</sup>                                                                                                              | This study              |
| <b>B. subtilis strains</b>                                                               |                                                                                                                                                                                |                         |
| 1A700                                                                                    | <i>B. subtilis</i> 1A700                                                                                                                                                       | Gruber lab collection   |
| 1A700 Δ <i>ccrZ<sub>Bs</sub></i>                                                         | 1A700, Δ <i>ytmP</i> ; Ery <sup>R</sup>                                                                                                                                        | This study              |
| <i>ccrZ<sub>Bs</sub>-gfp</i>                                                             | 1A700, <i>ytmP-msfgfp</i> ; Ery <sup>R</sup>                                                                                                                                   | This study              |
| JH642                                                                                    | <i>B. subtilis</i> JH642                                                                                                                                                       | 23                      |
| JH642 Δ <i>ccrZ<sub>Bs</sub></i>                                                         | JH642, Δ <i>ytmP</i> ; Cam <sup>R</sup>                                                                                                                                        | This study              |
| <i>oriN</i>                                                                              | JH642, <i>oriC::oriN-repN, Ppen-dnaN</i> ; Kan <sup>R</sup>                                                                                                                    | This study              |
| <i>oriN, ΔccrZ<sub>Bs</sub></i>                                                          | JH642, <i>oriC::oriN-repN, Ppen-dnaN, ΔytmP</i> ; Cam <sup>R</sup> ; Can <sup>R</sup>                                                                                          | This study              |
| <i>dnaB134</i>                                                                           | <i>dnaB</i> temperature sensitive mutant                                                                                                                                       | Grossman lab collection |
| <b>Plasmids</b>                                                                          |                                                                                                                                                                                |                         |
| pPEPY                                                                                    | Vector with <i>Plac</i> , allowing integration into <i>S. pneumoniae</i> CIL locus ( <i>spv_2166-spv_2165</i> ); Kan <sup>R</sup>                                              | 24                      |
| pPEPZ                                                                                    | Vector with <i>Plac</i> , allowing integration into <i>S. pneumoniae</i> ZIP locus ( <i>spv_2416-spv_2419</i> ); Spc <sup>R</sup>                                              | 24                      |
| pCG6                                                                                     | pMK17 derivative, encoding <i>ccrZ</i> fused to 3' of <i>msfjfp</i> ; Tet <sup>R</sup>                                                                                         | 3                       |

|                                                               |                                                                                                                                                      |                        |
|---------------------------------------------------------------|------------------------------------------------------------------------------------------------------------------------------------------------------|------------------------|
| pMK11                                                         | Vector with $P_{Zn}$ ( $P_{ccrD}$ ) allowing integration into <i>S. pneumoniae</i> <i>bgaA</i> locus; Tet <sup>R</sup>                               | 1                      |
| pMK17                                                         | pMK11 derivative, encoding <i>msfgfp</i> ; Tet <sup>R</sup>                                                                                          | 1                      |
| pMK19-02                                                      | pMK17 derivative, encoding <i>parB</i> fused to <i>msfyfp</i> ; Tet <sup>R</sup>                                                                     | Veening Lab collection |
| pLOW-dcas9                                                    | <i>dcas9</i> downstream of $P_{lac}$ promoter; Amp <sup>R</sup> , Ery <sup>R</sup>                                                                   | 12                     |
| pCG248-sgRNA( <i>ccrZ<sub>Sa</sub></i> )                      | For constitutive expression of sgRNA( <i>ccrZ<sub>Sa</sub></i> ); Amp <sup>R</sup> , Cam <sup>R</sup>                                                | This study             |
| pCG248-sgRNA( <i>ccrZ<sub>Sa</sub></i> )- $P_{ccrZSa}-ccrZBs$ | For constitutive expression of sgRNA( <i>ccrZ<sub>Sa</sub></i> ), <i>ccrZ<sub>Bs</sub></i> ( <i>ytmP</i> ) expressed from $P_{ccrZSa}; Amp^R, Cam^R$ | This study             |
| pLOW- <i>msfgfp-parB</i>                                      | <i>msfgfp-parB</i> fusion downstream of $P_{lac}$ promoter; Amp <sup>R</sup> , Ery <sup>R</sup>                                                      | Kjos Lab collection    |
| pGK67                                                         | pGEM derivative, carrying a kanamycin resistance cassette; Cam <sup>R</sup>                                                                          | 18                     |
| pDL110                                                        | pJH101 derivative, carrying <i>oriN-repN</i> from pBPA23; Amp <sup>R</sup>                                                                           | 25                     |
| pUT18                                                         | Encoding CyaA T18 domain under control of $P_{lac}$ ; Amp <sup>R</sup>                                                                               | 26                     |
| pST25                                                         | Encoding CyaA T25 domain under control of $P_{lac}$ ; Spc <sup>R</sup>                                                                               | 26                     |
| pUC19                                                         | pUC18 derivative, inverted MCS, Amp <sup>R</sup>                                                                                                     | Addgene                |
| pJET1.2                                                       | pJET1.2                                                                                                                                              | Invitrogen             |
| pSG1525                                                       | pET-Gate2 derivative with MazEF toxin-antitoxin system for Golden gate assembly selection; Kan <sup>R</sup>                                          | 14                     |
| pSG0682                                                       | pJET1.2 derivative with erythromycin ( <i>ermB</i> ) cassette; Ery <sup>R</sup>                                                                      | 14                     |
| pSG3174                                                       | pUC19 derivative, carrying <i>ccrZ<sub>Bs</sub></i> ( <i>ytmP</i> ); Amp <sup>R</sup>                                                                | This study             |
| pSG3177                                                       | pUC19 derivative, carrying sequence of upstream region of <i>ccrZ<sub>Bs</sub></i> ( <i>ytmP</i> ); Amp <sup>R</sup>                                 | This study             |
| pSG3178                                                       | pUC19 derivative, carrying sequence of downstream region of <i>ccrZ<sub>Bs</sub></i> ( <i>ytmP</i> ); Amp <sup>R</sup>                               | This study             |
| pSG3175                                                       | pUC19 derivative, carrying <i>ccrZ<sub>Bs</sub></i> ( <i>ytmP</i> ) with no STOP codon for fusion with <i>msfgfp</i> ; Amp <sup>R</sup>              | This study             |
| pSG3176                                                       | pUC19 derivative, carrying sequence of downstream region of <i>ccrZ<sub>Bs</sub></i> ( <i>ytmP</i> ); Amp <sup>R</sup>                               | This study             |
| pSG3179                                                       | pUC19 derivative, carrying <i>msfgfp</i> ; Amp <sup>R</sup>                                                                                          | This study             |
| pSG2949                                                       | pET-Gate2 derivative, encoding <i>ccrZ</i> with C-terminal cysteine protease domain (CPD) with a 10his tag ; Kan <sup>R</sup>                        | This study             |
| pSG2950                                                       | pET-Gate2 derivative, encoding <i>ccrZ</i> fused to <i>sfgfp</i> with a 10his tag ; Kan <sup>R</sup>                                                 | This study             |
| pSG4227                                                       | pJET1.2 derivative, carrying <i>ftsZ</i> from <i>S. pneumoniae</i> ; Amp <sup>R</sup>                                                                | This study             |
| pSG1694                                                       | pET-Gold1 derivative encoding a <i>ccdB</i> cassette, used for Golden gate assembly ; Amp <sup>R</sup>                                               | Gruber Lab collection  |
| pSG4268                                                       | pETGold1 derivative encoding <i>ftsZ</i> from <i>S. pneumoniae</i> ; Amp <sup>R</sup>                                                                | This study             |
| pSG436                                                        | pET-Gate2 derivative encoding <i>ccdB</i> cassette ; Kan <sup>R</sup>                                                                                | Gruber Lab collection  |
| pSG366                                                        | pJET1.2 derivative carrying short sequence2 for Golden gate assembly ; Amp <sup>R</sup>                                                              | Gruber Lab collection  |
| pSG367                                                        | pJET1.2 derivative carrying short sequence3 for Golden gate assembly ; Amp <sup>R</sup>                                                              | Gruber Lab collection  |
| pSG2559                                                       | pET-Gold1 derivative carrying C-terminal cysteine protease domain (CPD) with a 10his tag; Amp <sup>R</sup>                                           | Gruber Lab collection  |
| pSG2562                                                       | pET-Gold1 derivative carrying <i>sFGFP</i> with a 10his ; Amp <sup>R</sup>                                                                           | Gruber Lab collection  |

---

***E. coli* strains**

---

|               |                                                                                                                                                                                                                                                                                                                                                                                                       |                         |
|---------------|-------------------------------------------------------------------------------------------------------------------------------------------------------------------------------------------------------------------------------------------------------------------------------------------------------------------------------------------------------------------------------------------------------|-------------------------|
| HM1784        | BTH101 derivative, F <sup>-</sup> , <i>cya-99</i> , <i>araD139</i> , <i>galE15</i> , <i>galK16</i> , <i>rpsL1</i> , <i>hsdR2</i> , <i>mcrA1</i> , <i>mcrB1</i> , $\Delta$ <i>rnh::kan</i> ; Str <sup>R</sup>                                                                                                                                                                                          | 26                      |
| IM08B         | K12 DH10B derivative, <i>mcrA</i> , $\Delta$ ( <i>mrr-hsdRMS-mcrBC</i> ), $\phi$ 80 <i>lacZ</i> $\Delta$ <i>M15</i> , $\Delta$ <i>lacX74</i> , <i>recA1</i> , <i>araD139</i> , $\Delta$ ( <i>ara-leu</i> )7697, <i>galU</i> , <i>galK</i> , <i>rpsL</i> , <i>endA1</i> , <i>nupG</i> , $\Delta$ <i>dem</i> , $\Omega$ <i>Phelp-hsdMS</i> (CC8-2), $\Omega$ <i>PN25-hsdS</i> (CC8-1); Str <sup>R</sup> | 27                      |
| BL21 DE3 Gold | B F <sup>-</sup> , <i>ompT</i> , <i>hsdS</i> (r <sub>B</sub> <sup>-</sup> m <sub>B</sub> <sup>-</sup> ), <i>dcm</i> <sup>+</sup> , <i>gal</i> $\lambda$ (DE3), <i>endA</i> , Hte; Tet <sup>R</sup>                                                                                                                                                                                                    | Agilent<br>Technologies |

Abbreviations: Tet<sup>R</sup>: tetracycline resistance; Kan<sup>R</sup>: kanamycin resistance; Cam<sup>R</sup>: chloramphenicol resistance; Ery<sup>R</sup>: erythromycin resistance; Spc<sup>R</sup>: spectinomycin resistance; Gen<sup>R</sup>: gentamycin resistance; Amp<sup>R</sup>: ampicillin resistance; SmBit: Small Bit; LgBit: Large Bit

**Supplementary Table 2: Oligonucleotides used in this study**

| Primer name | forward / reverse | Sequence (5' -> 3')                                                                                                         |
|-------------|-------------------|-----------------------------------------------------------------------------------------------------------------------------|
| 1           | F                 | CGATGGAATTCGAAACTTTATACGGAGGAAAGAAATG                                                                                       |
| 2           | R                 | GCGCACTAGTTCATCTTCTTTCCATACTTGCT                                                                                            |
| 3           | F                 | CACTTATTTTTCCCTAGATTCCA                                                                                                     |
| 4           | R                 | TGTTCATATGAAAATTCCTCCGGGCGGACTTCTTCTCCGTATAAAGTTTCCT                                                                        |
| 5           | F                 | AGTTATCTATTATTTAACGGGAGGAAATAAGACAAGTATGGAAAGAGAAGATGAG                                                                     |
| 6           | R                 | CATATATCCATAGTCAACTC                                                                                                        |
| 7           | F                 | GTCGCGCCCGAGGAATTTTCATATG                                                                                                   |
| 8           | R                 | TTATTCTCCCGTTAAATAATAGA                                                                                                     |
| 9           | R                 | GCGCGGATCCTCATCTTCTTTCCATACTTGCT                                                                                            |
| 10          | F                 | CATTTCTTCGCTGTTTCTC                                                                                                         |
| 11          | R                 | GGAAATATTGTTCTGGGAAG                                                                                                        |
| 12          | F                 | CGGATTTCCAACAAGCTTCA                                                                                                        |
| 13          | R                 | GGAACGTCGTCTCCGTTTTAACGATTTTTGAAAAATGGAGG                                                                                   |
| 14          | F                 | GGAACGTCGTCTCGTAGTTTTCAAAAAATCGTTAAGTAAATGAATG                                                                              |
| 15          | R                 | CCAAATAGTCCAAACAACGAC                                                                                                       |
| 16          | F                 | GGAACGTCGTCTCGAAACGAGGTGAAATCATGAGC                                                                                         |
| 17          | R                 | GGAACGTCGTCTCGACTAATTGAGAGAAGTTTCTATAGAATTTT                                                                                |
| 18          | R                 | GGATTCCCGTCTCCACTCCTTTAGCTGCAGCTTC                                                                                          |
| 19          | F                 | GGATTCCCGTCTCCGAGTGAGCAAGGGCGAGGAG                                                                                          |
| 20          | R                 | GGATTCCCGTCTCCGTTTTACTTGTACAGCTCGTCC                                                                                        |
| 21          | F                 | GGATTCCCGTCTCGAAACGAGGTGAAATCATGAGC                                                                                         |
| 22          | F                 | CAGCCATAGAGGAGATCATCATGTA                                                                                                   |
| 23          | R                 | TGCGCTAGGTCTCCTTTCTTCTCCGTATAAAGTTTC                                                                                        |
| 24          | F                 | TGCGCTAGGTCTCGGAAATGAACAAAAATATAAAATATTCTCAAACT                                                                             |
| 25          | R                 | TGCGCTAGGTCTCGTCTTATTCTCCCGTTAAATAATAGAT                                                                                    |
| 26          | F                 | TGCGCTAGGTCTCGAAGAGATAGCCTAAAATTAGGCTG                                                                                      |
| 27          | R                 | GGCTGCTACACGACCAAACCTCAG                                                                                                    |
| 28          | F                 | GCATGCGGCCGCAAACCTTTATACGGAGGAAAGAAATG                                                                                      |
| 29          | R                 | CGCCACTAGTTCCTTCTTTCCATACTTGCTCGG                                                                                           |
| 30          | F                 | GCATGCGGCCGCATAAAGAGGAAAAATAAATTATGAC                                                                                       |
| 31          | R                 | GCGCACTAGTACGATTTTTGAAAAATGGAGGTGTA                                                                                         |
| 32          | F                 | GCGCACTAGTGATTGGGTGATAATGAGC                                                                                                |
| 33          | R                 | GCATGCGGCCGCTCATCATCTTCTTTCCATACTTGT                                                                                        |
| 34          | F                 | GTAATGCCTGCGTGGTTATC                                                                                                        |
| 35          | R                 | ACGGATCCCCAGCTTGCGCGTCCTTCTCTCAAAGAAAAGCCTCTGGATTG                                                                          |
| 36          | R                 | CTATTCGTCAACCACTCTAACCCGAAGATATAAAACATCAGAGTATGGAC                                                                          |
| 37          | F                 | TCTGATGTTTTATATCTTCGGGTTAGAGTGGTTGACGAATAGGCCAAAACTAGTAGAATAGTAAG<br>GAAACTTTATACGGAGGAAAGAAATGAAACATCTTAGCTCAAAAGGAGAAGAGC |
| 38          | R                 | TCATCTTCTTTCCATACTTGCTC                                                                                                     |
| 39          | F                 | GAGGACGCGCAAGCTGGGGATCCGT                                                                                                   |
| 40          | F                 | CGATGGAATTCATAAAGAGGAAAAATAAATTATG                                                                                          |
| 41          | R                 | GCGCGGATCCTAACGATTTTTGAAAAATGGAGGTG                                                                                         |
| 42          | F                 | TGTCCTCCGTCTCCTAACGAGGTGAAATCATGAGC                                                                                         |
| 43          | R                 | GGAAATTACGGATCAAGATG                                                                                                        |
| 44          | R                 | TGTCCTCCGTCTCCGTTAATTTATTTTCTCTTTATTCGTCA                                                                                   |
| 45          | F                 | GCTATGTGGTCGGATTTGGTT                                                                                                       |
| 46          | R                 | CAGGACACGTCTCGATCTTCTTTCCATACTTGCT                                                                                          |
| 47          | F                 | CAGGACACGTCTCGAGATCCGATCTGGTGGAGAA                                                                                          |
| 48          | R                 | CAGGACACGTCTCGACTTATTTCTCCCGTTAAATAATAGAT                                                                                   |
| 49          | F                 | CAGGACACGTCTCAAGTATGGAAAGAGAAGATGAGAGT                                                                                      |
| 50          | R                 | CCAAACGGCTATCAAATACTTCA                                                                                                     |
| 51          | F                 | GCTATGTGGTCGGATTTGGTT                                                                                                       |
| 52          | F                 | CTTTGAGAAATCGGGTTAGAG                                                                                                       |



53 R GCTGTCAGGTCTCGCCTCTTCTCTTTCCATACTTGTCT  
54 F GCTGTCAGGTCTCCTAACCCGGAGGAATTTCA  
55 R GGCCATGGATCTGAAAAGTTC  
56 F GGAAGGTCGTCTCCTCGTACAACAGATTCAGTCGTTT  
57 R TGCCGATCGTCTCCTACATCGCTG  
58 F GATCGGAAGCATGTTTGACG  
59 R GGAAGGTCGTCTCCACGAACAATCGATTCACGGCG  
60 F TGCCGATCGTCTCGTGTAGATGTTCTAGTCGTGGAATC  
61 R CCAGCTAAAACATGACAAGC  
62 F GACAATTCTTGGTTAGGGCT  
63 R TGAGGGTCGTCTCCCTCTTCTCTTTCCATACTTGTCT  
64 F TGAGGGTCGTCTCCAGAGCGGCTCATCAGGCGGCG  
65 R TGAGGGTCGTCTCCACCTAATTGAGAGAAGTTTCTATAG  
66 F TGAGGGTCGTCTCCAGGTATGAAAAGAGAAGATGAGAGT  
67 R ATTCGGACGGTTTTCTTACGCG  
68 F GATACCCAAGCCAATCCAGAGGC  
69 R TGAGGGTCGTCTCGGTTATTTCCCTCCGTTAAATAATAGAT  
70 F TGAGGGTCGTCTCCTAACTTTATACGGAGAAAAGAAATGG  
71 F CCCGTATCGTCTCTGGCGGCTCATCAGGCGGCGGC  
72 R CCCGTATCGTCTCCCTAATTGAGAGAAGTTTCTATAG  
73 F CCCGTATGGTCTCTGGCGGCTCATCAGGCGGCGGC  
74 R CCCGTATGGTCTCCCTAATTGAGAGAAGTTTCTATAG  
75 F CTACTTAGTGCTGTGAGAGAAGC  
76 R CCCGTATCGTCTCCCGCCTTCGCTCCATCTCTCA  
77 F CCCGTATCGTCTCGTTAGTTTACTTTTGTTTTAGACTACTAG  
78 R GCTTCTGCAATTCGTTGGCTAG  
79 F AGCATAAATAGCAGCACCTA  
80 R CCCGTATCGTCTCCCGCCTTTAACAGCGTCTTTAAGAGCTTTACC  
81 F CCCGTATCGTCTCGTTAGTCAGTCTTTAAAAAGCCTATTGTATC  
82 R GCGATGGTTCAATATCCAAGTG  
83 F GGCTGTATCAGCCGCTTAGCTGTC  
84 R CCCGTATGGTCTCCCGCCTTTGATTTTCTTTTTGATTGATTCA  
85 F CCCGTATGGTCTCGTTAGTTTGTGGATAACTTTTAGTTTTTATC  
86 R CACCAGTAACCTGATCAGTATCGA  
87 F GGCCTTAAGTCATATTGTGGATCGT  
88 R CCCGTATGGTCTCCCGCAAAACGAATCGTTTCACGTGTTTTC  
89 F CCCGTATGGTCTCGTTAGTAAAAGAAAAGATTTTATTGTGTGAG  
90 R TGCCTCTGCAGCCTTCAAATGGCGG  
91 F GATGCAGCAGCAACTGCTATC  
92 R CCCGTATCGTCTCCCGCCTTCGTCAAAACATGCTTCCGATC  
93 F CCCGTATCGTCTCGTTAGAGAGGAAAAATAAATTATGAC  
94 R CTCACGGTAGTTAGTAGCAGATCTA  
95 F GAGGTAATGACGAACGTGAACAAAC  
96 R CCCGTATCGTCTCCCGCCTTTTTCGTATTCATTTTTGACTTTAC  
97 F CCCGTATCGTCTCGTTAGCCCTGAGAGAGGCTGGAGCCTC  
98 R TTAGGCACGCCGCCAGCGTTCGTCC  
99 F GCGCCTTGCAGTTGGTTCGAAAACC  
100 R CCCGTATCGTCTCCCGCCTTCAACAGAAGGTTTCATTGGTTG  
101 F CCCGTATCGTCTCGTTAGGATAAAGAAAGGATAGTTTATGTCTC  
102 R GAATATCAAACAAGGCACGACGG  
103 F CACTGAAAATACTGCCACTATATT  
104 R CCCGTATCGTCTCCCGCCTGCATTTCCGTATTGAAGAACAACCTGC  
105 F CCCGTATCGTCTCGTTAGATAAGCCTAAAATAAAAAGAAAACCTCAGC  
106 R CGATAGATTTCTTCTGCCCATAGC  
107 F GAAGGATTGACTGGTGGCAGAATG  
108 R CCCGTATCGTCTCCCGCCTCTCCTAAAGTTAATGTAATTTTT  
109 F CCCGTATCGTCTCGTTAGTATGTTTATTCCATCAGTGCTG

110 R CATCAGCTTCGCCTTATCTACAACC  
111 F GAGATCACGCGCAATGACAGAAGAA  
112 R CCCGTATCGTCTCCCGCTAAGGAATCCTCAATCTTGCTCTGT  
113 F CCCGTATCGTCTCGTTAGCAGAGCAAGATTGAGGATTCCCTTATG  
114 R CGACGGATTTCGCGCAATCTTTCAC  
115 F GATGAGTGGTGTATCTCAAATG  
116 R CCCGTATCGTCTCCCGCTGCTTGTGGTTTTCGCTAGGTAACCA  
117 F CCCGTATCGTCTCGTTAGAAAAATAGAAAAATGAAAAAGATTGG  
118 R CAAAGCTAGCAAAGGTTGCTTCTAA  
119 F GGTCAATGAGATTGAGCTTGTCC  
120 R CCCGTATCGTCTCCCGCTGCAAGTCTTCTCTTTTCTTATCT  
121 F CCCGTATCGTCTCGTTAGAAAGAAATGAACCTTGCCAAACAGC  
122 R TTCCTACGTTCCGACATTACCCACTA  
123 F CATGTCTATCCTTGGACTCTTTGTC  
124 R CCCGTATCGTCTCCCGCCGATTTTCACTTCGATCACAGCATCCC  
125 F CCCGTATCGTCTCGTTAGTCAATCCTCTCTAATGTGAAAACG  
126 R GTCGCTACCGTCCGTAATCACTTAA  
127 F GACCTGCCATGAGTTTGTGAAACT  
128 R CCCGTATCGTCTCCCGCCAAGAGTATAGGCCATGGCCCCTGC  
129 F CCCGTATCGTCTCGTTAGAAATCTCTTTAAACCATGTCAGC  
130 R GCGGCTGTCGCAGAGTTGAGACAAA  
131 F ATGTCTTTTCTGATTTAAAGCTGTTTGCCC  
132 R CTATTTCTTCCAATTTTATTTATTTTGAAGGCGAATGCTCTATCCAGC  
133 F GCTGGATAGAGCATTTCGCTTCAAATAAAATAAAATTGGAAGAAATAG  
134 R GCCGCCGCCGCTGATGAGCCGCTTTAACAGCGTCTTTAAGAGCTTTAC  
135 F GTAAAGCTTTAAAGACGCTGTTAAAGGCGGCTCATCAGGCGGCGGCGGC  
136 R CTTGTCCCACTGACAATGGTAATATC  
137 F GATTGTAACCGATTCTCTG  
138 R GGAATGCTTGGTCAAATCTA  
139 F CAAGCAAAAACATATTGTCCTAACG  
140 R CGTTAGGACAATATGTTTTTGCTTG  
141 F GCCATTTTACAACGTAACGGAAC  
142 R GTTCCGTTTTACGTTGAAAATGGC  
143 F TCTTCTTTTATCCCAACCTG  
144 R GAGTCTGTGAAATCTGTGGA  
145 R ACCCTGACGCTCTCGTTTCTTCCCGTATAAAGTTTC  
146 F ACCCTGACGCTCTCCGAAATGGATTGGGTGATAATGAGC  
147 F GCTACTTCTCTATATTGCCAGTC  
148 R CACGAACCGTCTCGCATAAAACAGCCCTTTCCTTTCTTTATCATTC  
149 F CACGAACCGTCTCGTATGAGCAATTTGATTAACGGAAAAATAC  
150 R CACGAACCGTCTCGGCCTAATTGAGAGAAGTTTCTATAGAATTTTC  
151 F CACGAACCGTCTCCAGGCATGCAGATTCAAAAAAGTTTAAAG  
152 R CCCTTTCTTTCATCTTCTCC  
153 F GTACGACATAGTGCTTGGATTGAGAC  
154 R GTCTCAATCCAAGCACTATGTCGTAC  
155 F GCGACCATTGTCGCTGGAGATGTACG  
156 R CGTACATCTCCAGCGACAATGGTCGC  
157 F GATTTATTTAGTAGCTTGGGATTCCG  
158 R CCGAATCCCAAGCTACTAAATAAATC  
159 R GCGTCACGCTCAGCATTATTTTCTCCTTATTTAT  
160 F GCGTCACGCTCACGGATCCCTCCAGTAACTCGAGAA  
161 F GCGTCACGCTCAATGCAAATTTATACGGAGGAAAGAAATGG  
162 R GCGTCACGCTCATCCGCTTACTTATAAAGCTCATCCATGCC  
163 F GCCAATAAATTGCTTCTTGTGTTTIG  
164 R AATAATTCTTTCTTTGACACCGTATATG  
165 F GATGTTATTGAACATCAAGTGAGACTAGAG  
166 R AATCGCCATCTTCCAATCCC

167 F AATTGCGGCCGAGGAGTTATCATGTCAATTTATCAAGAATTG  
168 R AGTGGGTCTCCCTTTCCTTAATTTGTACGAACTGG  
169 F AGTGGGTCTCGAAAGGAGAATCCATGATTCATTTT  
170 R AGTGGGTCTCGATCCATTTGTACGAACTGGTGAATG  
171 F GGTGCTCTTCGAAAGAGGTTGAGCCTGGCTC  
172 R CAAAGGCGTCTTACGTCCTTG  
173 F TCACGGTCTCGGGATCCGGATCTGGTGGA  
174 R TCACGGTCTCGTAGCTTATTATTTGTATAGTTTCGTCCATGC  
175 F TCACGGTCTCCGCTAGTAGGAGGCATATCAAATGA  
176 R TGAGGCTCTCGTTCTGCCGCTTATAAAAGCCAG  
177 F GCATGCGGCCGCAATAGTAAAGGAGGAGAAAGGATTG  
178 R CGCCACTAGTTTGTATTTCTTTTGATTGATTCA  
179 R TATAGTTATTATACCAGGGGGACAGTGC  
180 F GCTGATAATGCCGCAATAAAGTTAAGAGCTATGCTGGAAACAG  
181 F TCGAGGATCCTAGAGTTTATCGCCTACAGAG  
182 R GTAATTGCCCAACCAGTTCAT CTCGTCCACCTCACTTCAA  
183 F TTGAAAGTGAGGTGGACGAG ATGAACTGGTTGGGACAATTAC  
184 R ACTGGGTACCTTAATCAACAATTCGTTTCATGAGGA  
185 F GATCCCATGGAGCAGTTTTATCAATTAGG  
186 R TCCGGGGATCCAAATAAACATGTTACTATTCATAACT  
187 F GTTACAGAATTCGGTCTCGCGAGTAGCACCGATTGTTCCGGAACC  
188 R GTTACATCTAGAGGTCTCGTATTTCAAGCAAAACTCTTAAGATCTGATGC  
189 F GTTACAGAATTCGGTCTCGAGGTCATATCCTCATGAAACGAAATGTTG  
190 R GTTACATCTAGAGGTCTCTATGGCAATATCTGCGTTTTAGCC  
191 R GTTACAGAATTCGGTCTCGCCTGTAATCAGGAATACGAATCCATTGC  
192 R GTTACATCTAGAGGTCTCGACCTAGTAATTGTCCCAACCAGTTCAT  
193 F GTTACAGAATTCGGTCTCGTCTACGAAGTTTGCTATAGCGCTAAAATTTAAAG  
194 R GTTACATCTAGAGGTCTCGTCCATCAACAATTCGTTTCATGAGG  
195 F GTTACAGAATTCGGTCTCAGGAGCAGGCGGTAGCGCAGCGGTGGCTCA  
196 R GTTACATCTAGAGGTCTCAGGTCATTTGTATAGTTCATCCATGC  
197 F CAAATCGAGACTGACGTATGTCAG  
198 R TCAGGAATACGAATCCATTTGCTC  
199 F GGGTAGAGCAAATGGATTTCGATTCTCTGAGGCTTAACTATGCGGCATCAG  
200 R GCTGGATAGACTAGAAACGATTAGCCCGGATTTTCTCCTTACGCATCTG  
201 F GGCTAATCGTTTCTAGTCTATCCAG  
202 R CAAGCTGTGATGCATGGAATTG  
203 F TACGCCAACCATACTTAATAGCA  
204 R CGCAACTGTCCATACTCTGATGTCTATTATGGTTGCAAGAAAATAAAAG  
205 F CTTTTATTTCTTGCAACCATAATAGACATCAGAGTATGGACAGTTGCG  
206 R GGAAAAGATTTTAGGAGGAAGCTGAACCATTTGAGGTGATAGGTAAG  
207 F GTTGAACAAATGGGTGCAGCTTCTCCTAAAATCTTTCCCAT  
208 R CGTTTTTTCGAAAGAAGAATATGTAGAAGAAGTATTGATG  
209 F CTTTACATATTCTTTTCCGAAAAAACGGTTGCATTTA  
210 R TCCTCCTAACGATAATGTATGCAGCCGACTCAAACATCAAATC  
211 F GCTGCATACATTATCCGTTAGGAGGATAAAAATGAAATTCACGAT TCAAAAAGATCGTC  
212 R CTGTATCAATTGAAATCGGATTTGC  
213 F CTCGAGGGTCTCACGAGAATAATTTGTTTAACTTTAAGAAGGAGATATACATATGGATTGGGTGA  
TAATGAGCTAACACTG  
214 R GCTGCAGGTCTCAGCCAGCTTCTCTTTCCATACTTGTCTCGAAATG  
215 F GCAGCCGTCATATGATGACATTTTCATTTGATACAGCTGCTGC  
216 R CGTCTCACAGGTTAACGATTTTGGAAAAATGGAGGTGTATCC  
217 F GCATCAACATCTTGTGTGCACG  
218 R GCTTGGTAAATCAAACACGCC  
219 F GCACTCAAACCTAGAAGAGC  
220 R CAACTCACATGAACTACATGATG  
222 F GCCAATAAATTGCTTCTTGTGTTT  
223 R GCGTCACGTCTCAGCATTATTTTCTCCTTATTTAT

|      |   |                                              |
|------|---|----------------------------------------------|
| 224  | F | GCGTCACGTCTCACGGATCCCTCCAGTAACTCGAGAA        |
| 225  | R | AATAATTCTTTCTTTGACACCGTATATG                 |
| 226  | F | GCGTCACGTCTCAATGCAATAGTAAAGGAGGAGAAAGGATTG   |
| 227  | R | GCGTCACGTCTCATCCGTTATTATAGGATTTCTTCGA        |
| 228  | F | CCCTGTACGTCTCCaggctcatcaggcggcggcg           |
| 229  | R | CCCTGTACGTCTCCgcTTATTTCTCCCGTTAAATAATAGATAAC |
| 230  | F | gatgtcaccttgattaagccag                       |
| 231  | R | CCCTGTACGTCTCCcctccctgtatagcaactcg           |
| 232  | F | CCCTGTACGTCTCGAAgcatgcagattcaaaaagtt         |
| 233  | R | gtcaacttcatcagctcttctatct                    |
| OT1  | F | ACGGTCTATCCCAGCTGTTG                         |
| OT2  | R | ATAGGCGCGTGCTTCTCTA                          |
| OT3  | F | GAAAAGTACCATCCCCAGCA                         |
| OT4  | R | AGCCTTGGTGCCTATCATTG                         |
| OT5  | F | TGCATATCCGCGTCAAATAG                         |
| OT6  | R | GCATGAATGACGGTTCGTATG                        |
| OT7  | F | CGCGGTAGGTATTGCGTTA                          |
| OT8  | R | CTTCGCGCACTTGAATAACA                         |
| OT9  | F | TTGCCGCAGATTGAAGAG                           |
| OT10 | R | AGGTGGACACTGCAAATAC                          |
| OT11 | F | CGCGCTGACTCTGATATTATG                        |
| OT12 | R | CAAAGAGGAGCTGCTGTAAC                         |

**Supplementary Table 3: Ratio of spectral counts between GFP-CcrZ and GFP from LC-MS/MS**

| Identified Proteins | Fold change<br>(GFP-CcrZ / GFP) |
|---------------------|---------------------------------|
| SPV_0476 (CcrZ)     | 27                              |
| ScrA                | 12                              |
| PepN                | 8.5                             |
| Pbp2X               | 8.3                             |
| FruA                | 7.4                             |
| EzrA                | 7.4                             |
| SPV_1621            | 6.8                             |
| FtsZ                | 6.6                             |
| PlsC                | 6                               |
| FtsH                | 5.1                             |
| DnaA                | 2.8                             |

### Supplementary Table 4. CRISPRi-seq results for *ccrZ*-complementation vs *ccrZ*-depletion

Significance of differential sgRNA depletion/enrichment (absolute  $\log_2FC > 1$ , FDR-adjusted  $P$  value  $< 0.05$ ) was tested with the DESeq2 package (see Methods).

| sgRNA Locus Tag                                                                                                                            | sgRNA Genes Name                                                                                                                                                         | ccrZ + FC | ccrZ - FC | $\Delta FC$ | adjusted p-value |
|--------------------------------------------------------------------------------------------------------------------------------------------|--------------------------------------------------------------------------------------------------------------------------------------------------------------------------|-----------|-----------|-------------|------------------|
| SPV_0826                                                                                                                                   | holB                                                                                                                                                                     | -2.17930  | 0.68752   | 2.88021     | 1.8E-23          |
| SPV_0827                                                                                                                                   | yabA                                                                                                                                                                     | -0.59237  | 1.90685   | 2.50661     | 1.1E-21          |
| SPV_0878                                                                                                                                   | orfX                                                                                                                                                                     | -0.55568  | -2.93204  | -2.35409    | 1.2E-07          |
| SPV_1694, SPV_1683, SPV_1686, SPV_1691, SPV_1689, SPV_1682, SPV_1684, SPV_1692, SPV_1688, SPV_1695, SPV_1685, SPV_1690, SPV_1693, SPV_1687 | tRNA-Thr-2, tRNA-Ile-1, tRNA-fMet-1, tRNA-Arg-3, tRNA-Met-1, tRNA-Ser-2, tRNA-Gly-1, tRNA-Leu-2, tRNA-Ile2-1, tRNA-Leu-3, tRNA-Phe-1, tRNA-Pro-1, tRNA-Gly-2, tRNA-Ser-3 | -2.89305  | -0.90916  | 1.99195     | 6.4E-06          |
| SPV_1428                                                                                                                                   | cmk                                                                                                                                                                      | -1.97401  | -0.27583  | 1.71463     | 2.0E-05          |
| SPV_1885                                                                                                                                   | tRNA-fMet-2                                                                                                                                                              | -3.43986  | -1.49497  | 1.95470     | 5.5E-05          |
| SPV_0506                                                                                                                                   | pheT                                                                                                                                                                     | -2.48212  | -0.78336  | 1.70863     | 8.0E-05          |
| SPV_1416, SPV_1417                                                                                                                         | murT, gatD                                                                                                                                                               | -1.92621  | -0.19268  | 1.75009     | 8.0E-05          |
| SPV_1477                                                                                                                                   | sepF                                                                                                                                                                     | -3.55870  | -1.58888  | 1.98277     | 2.4E-04          |
| SPV_0721                                                                                                                                   | fold                                                                                                                                                                     | -1.65240  | -0.18280  | 1.48331     | 4.7E-04          |
| SPV_0825                                                                                                                                   | tmk                                                                                                                                                                      | -3.86986  | -1.89413  | 1.98323     | 7.1E-04          |
| SPV_2447                                                                                                                                   | srf-27                                                                                                                                                                   | -2.31680  | -0.47976  | 1.84793     | 8.2E-04          |
| SPV_0098                                                                                                                                   | unknown                                                                                                                                                                  | -2.12298  | -0.49091  | 1.64505     | 2.5E-03          |
| SPV_0774                                                                                                                                   | ftsK                                                                                                                                                                     | -0.17089  | -1.70687  | -1.51904    | 2.5E-03          |
| SPV_1039, SPV_1040                                                                                                                         | ptsI, ptsH                                                                                                                                                               | -3.17079  | -1.28447  | 1.90596     | 3.4E-03          |
| SPV_1216, SPV_1217                                                                                                                         | alaS, unknown                                                                                                                                                            | -2.97262  | -1.31148  | 1.67317     | 3.4E-03          |
| SPV_1548, SPV_1547                                                                                                                         | gmk, rpoZ                                                                                                                                                                | -2.89919  | -1.12040  | 1.78808     | 3.4E-03          |
| SPV_1123, SPV_1127, SPV_1125, SPV_1124, SPV_1126                                                                                           | licC, tarI, licA, licB, tarJ                                                                                                                                             | -1.68717  | -0.14800  | 1.55259     | 1.4E-02          |
| SPV_1128                                                                                                                                   | tacF                                                                                                                                                                     | -1.64076  | -0.16633  | 1.48908     | 1.8E-02          |
| SPV_1305, SPV_2339, SPV_1303, SPV_1304                                                                                                     | glyQ, unknown, unknown, glyS                                                                                                                                             | -2.68473  | -1.06266  | 1.63681     | 2.3E-02          |
| SPV_0346, SPV_0349, SPV_0347, SPV_0348                                                                                                     | mvk, fni, mvaD, mvaK2                                                                                                                                                    | -0.73104  | 0.66488   | 1.41140     | 3.5E-02          |
| SPV_1129                                                                                                                                   | licD1                                                                                                                                                                    | -1.25224  | 0.17989   | 1.44633     | 3.5E-02          |
| SPV_0967                                                                                                                                   | murA-1                                                                                                                                                                   | -0.74607  | 0.70383   | 1.46592     | 3.9E-02          |
| SPV_1475                                                                                                                                   | ylmH                                                                                                                                                                     | -3.10233  | -1.26574  | 1.85460     | 3.9E-02          |
| SPV_1476                                                                                                                                   | ylmG                                                                                                                                                                     | -3.37976  | -1.69753  | 1.69454     | 4.2E-02          |
| SPV_0099                                                                                                                                   | aatA                                                                                                                                                                     | -2.23984  | -0.61836  | 1.63300     | 5.2E-02          |
| SPV_1484                                                                                                                                   | ddl                                                                                                                                                                      | -5.03792  | -3.13035  | 1.92305     | 5.2E-02          |
| SPV_0968                                                                                                                                   | unknown                                                                                                                                                                  | -0.40840  | 0.94624   | 1.36594     | 6.6E-02          |
| SPV_1373                                                                                                                                   | aspC                                                                                                                                                                     | -2.66016  | -1.17033  | 1.50242     | 6.8E-02          |
| SPV_0248                                                                                                                                   | glmS                                                                                                                                                                     | -2.36386  | -0.85340  | 1.52023     | 9.9E-02          |
| SPV_0477, SPV_0476                                                                                                                         | trmB, unknown                                                                                                                                                            | -1.59225  | -0.13290  | 1.48177     | 1.0E-01          |
| SPV_1790                                                                                                                                   | rpmH                                                                                                                                                                     | -2.32602  | -0.82953  | 1.51143     | 1.3E-01          |
| SPV_1639                                                                                                                                   | sczA                                                                                                                                                                     | -2.11368  | -0.53646  | 1.59522     | 1.3E-01          |
| SPV_0526                                                                                                                                   | fba                                                                                                                                                                      | -1.90239  | -0.53794  | 1.37655     | 1.5E-01          |
| SPV_1791                                                                                                                                   | unknown                                                                                                                                                                  | -3.65783  | -1.94843  | 1.71258     | 1.5E-01          |
| SPV_1358                                                                                                                                   | ytgP                                                                                                                                                                     | -1.92015  | -0.53300  | 1.40307     | 1.6E-01          |
| SPV_1940, SPV_1941                                                                                                                         | unknown, aspS                                                                                                                                                            | -2.89975  | -1.33455  | 1.57645     | 2.4E-01          |
| SPV_2421                                                                                                                                   | srf-23                                                                                                                                                                   | -2.98851  | -1.47692  | 1.52779     | 2.7E-01          |
| SPV_2330                                                                                                                                   | srf-20                                                                                                                                                                   | -4.22250  | -2.43257  | 1.80152     | 3.3E-01          |
| SPV_1374                                                                                                                                   | unknown                                                                                                                                                                  | -2.78366  | -1.38349  | 1.41504     | 4.0E-01          |
| SPV_1886                                                                                                                                   | tRNA-Ser-4                                                                                                                                                               | -3.43400  | -1.96408  | 1.48260     | 4.2E-01          |
| SPV_2449                                                                                                                                   | srf-28                                                                                                                                                                   | -1.21815  | 0.11773   | 1.35248     | 5.2E-01          |
| SPV_0664                                                                                                                                   | metK                                                                                                                                                                     | -2.55487  | -1.14934  | 1.41806     | 5.4E-01          |
| SPV_0244, SPV_0243, SPV_0245, SPV_0246                                                                                                     | cdsA, uppS, eep, proS                                                                                                                                                    | -2.78046  | -1.38060  | 1.41361     | 6.1E-01          |
| SPV_2066                                                                                                                                   | tRNA-Arg-5                                                                                                                                                               | -2.87606  | -1.58010  | 1.30915     | 6.1E-01          |
| SPV_1200, SPV_1197, SPV_1198, SPV_1199, SPV_1201                                                                                           | unknown, tarQ, tarP, cps23FU, licD3                                                                                                                                      | -0.80883  | 0.56746   | 1.39351     | 6.2E-01          |
| SPV_0834                                                                                                                                   | pyrH                                                                                                                                                                     | -1.84418  | -0.47869  | 1.37997     | 6.5E-01          |
| SPV_1041, SPV_1042, SPV_1043                                                                                                               | nrdH, nrdE, nrdF                                                                                                                                                         | -5.31669  | -3.61374  | 1.71968     | 7.9E-01          |
| SPV_1472                                                                                                                                   | ileS                                                                                                                                                                     | -3.23326  | -1.83165  | 1.41615     | 9.0E-01          |
| SPV_0019                                                                                                                                   | rrfA                                                                                                                                                                     | -2.82999  | -1.44210  | 1.40219     | 9.5E-01          |
| SPV_1628, SPV_1629                                                                                                                         | NA, pbuX                                                                                                                                                                 | -0.04137  | 0.05785   | 0.11339     | 1                |
| SPV_0001, SPV_0002                                                                                                                         | dnaA, dnaN                                                                                                                                                               | -2.87828  | -3.49810  | -0.60566    | 1                |
| SPV_0003                                                                                                                                   | unknown                                                                                                                                                                  | 0.13287   | -0.21255  | -0.32910    | 1                |
| SPV_0004                                                                                                                                   | ychF                                                                                                                                                                     | -0.21524  | -0.05853  | 0.17299     | 1                |

|                                                                                                                        |                                                                           |          |          |          |   |
|------------------------------------------------------------------------------------------------------------------------|---------------------------------------------------------------------------|----------|----------|----------|---|
| SPV_0005                                                                                                               | pth                                                                       | 0.04314  | 0.25657  | 0.22820  | 1 |
| SPV_0006                                                                                                               | mfd                                                                       | 0.03865  | 0.16602  | 0.14424  | 1 |
| SPV_0007, SPV_0008                                                                                                     | unknown, divIC                                                            | -0.46091 | 0.15123  | 0.62513  | 1 |
| SPV_0010                                                                                                               | unknown                                                                   | -0.42058 | -0.08736 | 0.35188  | 1 |
| SPV_0011                                                                                                               | tilS                                                                      | -0.22678 | -0.08684 | 0.15099  | 1 |
| SPV_0012                                                                                                               | hpt                                                                       | -0.61879 | -0.68118 | -0.05081 | 1 |
| SPV_0013                                                                                                               | ftsH                                                                      | -0.25060 | -0.37279 | -0.11047 | 1 |
| SPV_0014                                                                                                               | comX1                                                                     | 0.12194  | 0.13112  | 0.02359  | 1 |
| SPV_0016                                                                                                               | rrsA                                                                      | -0.26622 | -0.55192 | -0.27175 | 1 |
| SPV_0017                                                                                                               | tRNA-Ala-1                                                                | 0.08545  | -0.08251 | -0.15582 | 1 |
| SPV_0018                                                                                                               | rrlA                                                                      | -3.04883 | -2.04468 | 1.01509  | 1 |
| SPV_0025, SPV_0026                                                                                                     | unknown, scRNA                                                            | -0.02723 | 0.12527  | 0.16124  | 1 |
| SPV_0026                                                                                                               | scRNA                                                                     | -0.25914 | -0.05052 | 0.22194  | 1 |
| SPV_0029, SPV_0027, SPV_0028                                                                                           | radA, dut, unknown                                                        | -0.07174 | 0.06255  | 0.14911  | 1 |
| SPV_0030, SPV_2079                                                                                                     | unknown, prsW                                                             | -0.25432 | 0.76406  | 1.03112  | 1 |
| SPV_0033                                                                                                               | prs1                                                                      | -2.00358 | -1.06580 | 0.94864  | 1 |
| SPV_0034                                                                                                               | unknown                                                                   | 0.05659  | 0.10022  | 0.06248  | 1 |
| SPV_0038                                                                                                               | polA                                                                      | -0.05992 | -0.22017 | -0.15087 | 1 |
| SPV_0039                                                                                                               | unknown                                                                   | 0.21695  | -0.04187 | -0.25231 | 1 |
| SPV_0040                                                                                                               | yeiH                                                                      | 0.01764  | 0.02924  | 0.02319  | 1 |
| SPV_0041, SPV_0045, SPV_0043, SPV_0042, SPV_0044                                                                       | araT, unknown, plsX, recO, unknown                                        | -0.18768 | -0.17497 | 0.02937  | 1 |
| SPV_0046                                                                                                               | blpU                                                                      | 0.21196  | -0.03617 | -0.22929 | 1 |
| SPV_0047                                                                                                               | unknown                                                                   | 0.05435  | -0.03059 | -0.06751 | 1 |
| SPV_0060, SPV_0056, SPV_0057, SPV_0055, SPV_0054, SPV_0062, SPV_0052, SPV_0061, SPV_0051, SPV_0059, SPV_0053, SPV_0058 | purK, vanZ, purH, purN, purM, purB, purL, unknown, purC, purE, purF, purD | -0.00973 | 0.10750  | 0.12774  | 1 |
| SPV_0060, SPV_0062, SPV_0061, SPV_0059, SPV_0058                                                                       | purK, purB, unknown, purE, purD                                           | 0.24252  | 0.07007  | -0.15220 | 1 |
| SPV_0062, SPV_0061                                                                                                     | purB, unknown                                                             | -0.63402 | -0.09203 | 0.55972  | 1 |
| SPV_0063                                                                                                               | strH                                                                      | 0.13033  | 0.06744  | -0.04544 | 1 |
| SPV_0064                                                                                                               | cpsR                                                                      | -0.20488 | -0.16572 | 0.05407  | 1 |
| SPV_0066, SPV_0065, SPV_0068, SPV_0067, SPV_0071, SPV_0069, SPV_0070                                                   | gadV, bgaC, gadE, gadW, galM, gadF, agaS                                  | 0.00431  | -0.01246 | -0.00262 | 1 |
| SPV_0073                                                                                                               | unknown                                                                   | -0.00888 | -0.00313 | 0.02176  | 1 |
| SPV_0073, SPV_0072                                                                                                     | unknown, unknown                                                          | 0.07242  | -0.07479 | -0.13308 | 1 |
| SPV_0074                                                                                                               | unknown                                                                   | 0.03079  | 0.07028  | 0.05352  | 1 |
| SPV_0076                                                                                                               | unknown                                                                   | 0.01245  | 0.08752  | 0.08585  | 1 |
| SPV_0077                                                                                                               | cabP                                                                      | 0.02176  | 0.08028  | 0.07328  | 1 |
| SPV_0080                                                                                                               | pavB                                                                      | 0.02653  | 0.00699  | -0.00076 | 1 |
| SPV_0082, SPV_0081                                                                                                     | unknown, unknown                                                          | 0.06198  | 0.01506  | -0.02824 | 1 |
| SPV_0083                                                                                                               | rpsD                                                                      | -3.36441 | -2.39486 | 0.98529  | 1 |
| SPV_0086                                                                                                               | unknown                                                                   | 0.04821  | 0.02632  | -0.00673 | 1 |
| SPV_0087                                                                                                               | unknown                                                                   | -0.00491 | 0.11419  | 0.13041  | 1 |
| SPV_0088                                                                                                               | unknown                                                                   | 0.21833  | -0.05030 | -0.24940 | 1 |
| SPV_0089                                                                                                               | unknown                                                                   | 0.21134  | -0.01796 | -0.21252 | 1 |
| SPV_0090                                                                                                               | unknown                                                                   | -0.01205 | 0.04289  | 0.06088  | 1 |
| SPV_0091                                                                                                               | unknown                                                                   | -0.09572 | 0.05070  | 0.15995  | 1 |
| SPV_0092                                                                                                               | unknown                                                                   | -0.08541 | 0.06534  | 0.16691  | 1 |
| SPV_0093, SPV_0095, SPV_0094, SPV_0096                                                                                 | ptvC, ptvA, ptvB, ptvR                                                    | 0.08385  | 0.05394  | -0.01715 | 1 |
| SPV_0097                                                                                                               | unknown                                                                   | 0.24712  | 0.00676  | -0.22539 | 1 |
| SPV_0101, SPV_0102, SPV_0103, SPV_2095                                                                                 | gph, sdhA, sdhB, unknown                                                  | 0.08914  | 0.03150  | -0.03805 | 1 |
| SPV_0104                                                                                                               | unknown                                                                   | -0.00191 | 0.05235  | 0.06531  | 1 |
| SPV_0106                                                                                                               | unknown                                                                   | -0.07350 | 0.01574  | 0.09804  | 1 |
| SPV_0107, SPV_0108                                                                                                     | unknown, unknown                                                          | -0.10741 | 0.10449  | 0.21994  | 1 |
| SPV_0109                                                                                                               | unknown                                                                   | 0.11159  | 0.19738  | 0.09766  | 1 |
| SPV_0110                                                                                                               | argG                                                                      | 0.03558  | -0.02995 | -0.04690 | 1 |
| SPV_0111                                                                                                               | argH                                                                      | 0.03371  | 0.11819  | 0.10138  | 1 |
| SPV_0112                                                                                                               | unknown                                                                   | 0.36199  | -0.01985 | -0.36709 | 1 |
| SPV_0113                                                                                                               | unknown                                                                   | 0.01663  | -0.04900 | -0.05171 | 1 |
| SPV_0114                                                                                                               | unknown                                                                   | 0.01649  | 0.06643  | 0.06621  | 1 |
| SPV_0115                                                                                                               | unknown                                                                   | 0.02838  | 0.06719  | 0.05230  | 1 |
| SPV_0116                                                                                                               | unknown                                                                   | 0.10109  | 0.03659  | -0.05038 | 1 |
| SPV_0117                                                                                                               | unknown                                                                   | 0.17255  | 0.09601  | -0.06442 | 1 |

|                                                                                                                                                                                                                            |                                                                                                                                    |          |          |          |   |
|----------------------------------------------------------------------------------------------------------------------------------------------------------------------------------------------------------------------------|------------------------------------------------------------------------------------------------------------------------------------|----------|----------|----------|---|
| SPV_0118                                                                                                                                                                                                                   | unknown                                                                                                                            | 0.17230  | 0.04600  | -0.11072 | 1 |
| SPV_0123, SPV_2103, SPV_0124                                                                                                                                                                                               | unknown, unknown, unknown                                                                                                          | -0.00752 | 0.03021  | 0.04781  | 1 |
| SPV_0126                                                                                                                                                                                                                   | pspA                                                                                                                               | 0.30846  | 0.05882  | -0.23130 | 1 |
| SPV_0129, SPV_0128, SPV_0127, SPV_2107                                                                                                                                                                                     | mnmG, unknown, mnmA, srf-04                                                                                                        | -2.47899 | -1.62238 | 0.86947  | 1 |
| SPV_0129, SPV_0128, SPV_2107                                                                                                                                                                                               | mnmG, unknown, srf-04                                                                                                              | 0.05888  | -0.07267 | -0.11872 | 1 |
| SPV_0130                                                                                                                                                                                                                   | rnjA                                                                                                                               | -1.88700 | -0.70523 | 1.19623  | 1 |
| SPV_0131                                                                                                                                                                                                                   | unknown                                                                                                                            | -1.46584 | -0.44449 | 1.03742  | 1 |
| SPV_0134                                                                                                                                                                                                                   | unknown                                                                                                                            | -0.89447 | -0.78437 | 0.12516  | 1 |
| SPV_0135                                                                                                                                                                                                                   | rimI                                                                                                                               | -0.67355 | -0.72673 | -0.04121 | 1 |
| SPV_0136                                                                                                                                                                                                                   | tsaD                                                                                                                               | -0.80454 | -0.76366 | 0.05595  | 1 |
| SPV_0138                                                                                                                                                                                                                   | epsF                                                                                                                               | -0.13205 | 0.08622  | 0.23162  | 1 |
| SPV_0139                                                                                                                                                                                                                   | unknown                                                                                                                            | 0.00280  | 0.06856  | 0.07732  | 1 |
| SPV_0140                                                                                                                                                                                                                   | unknown                                                                                                                            | 0.12481  | 0.07802  | -0.03251 | 1 |
| SPV_0141                                                                                                                                                                                                                   | unknown                                                                                                                            | -0.15297 | 0.10075  | 0.26750  | 1 |
| SPV_0142                                                                                                                                                                                                                   | unknown                                                                                                                            | -0.08599 | 0.00981  | 0.10649  | 1 |
| SPV_0143                                                                                                                                                                                                                   | ugd                                                                                                                                | 0.09886  | 0.10761  | 0.02337  | 1 |
| SPV_0144                                                                                                                                                                                                                   | mutR1                                                                                                                              | 0.36824  | 0.00816  | -0.34571 | 1 |
| SPV_0147, SPV_0148                                                                                                                                                                                                         | unknown, unknown                                                                                                                   | -0.18271 | 0.08138  | 0.27579  | 1 |
| SPV_0147, SPV_0148, SPV_0146                                                                                                                                                                                               | unknown, unknown, unknown                                                                                                          | -0.04135 | 0.07338  | 0.12960  | 1 |
| SPV_0147, SPV_0148, SPV_0146, SPV_0145                                                                                                                                                                                     | unknown, unknown, unknown, unknown                                                                                                 | 0.51005  | -0.07544 | -0.56539 | 1 |
| SPV_0149                                                                                                                                                                                                                   | azlC                                                                                                                               | -1.00861 | 0.04576  | 1.07190  | 1 |
| SPV_0150                                                                                                                                                                                                                   | gshT                                                                                                                               | 0.23809  | 0.01105  | -0.21319 | 1 |
| SPV_0151                                                                                                                                                                                                                   | metQ                                                                                                                               | 0.20129  | 0.01178  | -0.17496 | 1 |
| SPV_0152                                                                                                                                                                                                                   | dapE                                                                                                                               | 0.20991  | 0.14256  | -0.05421 | 1 |
| SPV_0154, SPV_0153                                                                                                                                                                                                         | metP, metN                                                                                                                         | 0.26826  | -0.01508 | -0.26730 | 1 |
| SPV_0155                                                                                                                                                                                                                   | unknown                                                                                                                            | 0.41569  | -0.01152 | -0.41200 | 1 |
| SPV_0157, SPV_0156, SPV_0158                                                                                                                                                                                               | unknown, unknown, unknown                                                                                                          | -0.13360 | 0.08031  | 0.22644  | 1 |
| SPV_0159                                                                                                                                                                                                                   | unknown                                                                                                                            | 0.13495  | 0.16080  | 0.03752  | 1 |
| SPV_0160                                                                                                                                                                                                                   | nrdI                                                                                                                               | 0.14662  | 0.02383  | -0.10111 | 1 |
| SPV_0161                                                                                                                                                                                                                   | unknown                                                                                                                            | -0.08949 | 0.01644  | 0.12268  | 1 |
| SPV_0163, SPV_0162                                                                                                                                                                                                         | unknown, unknown                                                                                                                   | 0.26470  | 0.09811  | -0.14937 | 1 |
| SPV_0165                                                                                                                                                                                                                   | hexB                                                                                                                               | -0.04935 | 0.02202  | 0.08222  | 1 |
| SPV_0167, SPV_0168, SPV_0166, SPV_0169                                                                                                                                                                                     | ribB, ribE, ribH, ribD                                                                                                             | 0.11449  | 0.01852  | -0.08197 | 1 |
| SPV_0171, SPV_0170                                                                                                                                                                                                         | tag, ruvA                                                                                                                          | -0.09515 | -0.05244 | 0.05362  | 1 |
| SPV_0172                                                                                                                                                                                                                   | unknown                                                                                                                            | -0.05388 | -0.01198 | 0.05406  | 1 |
| SPV_0173                                                                                                                                                                                                                   | unknown                                                                                                                            | 0.13536  | 0.09854  | -0.01957 | 1 |
| SPV_0175, SPV_0174                                                                                                                                                                                                         | corA1, unknown                                                                                                                     | -1.05038 | -0.66909 | 0.38539  | 1 |
| SPV_0177, SPV_0176                                                                                                                                                                                                         | ypdF, uvrA                                                                                                                         | 0.19855  | 0.06316  | -0.12274 | 1 |
| SPV_0178                                                                                                                                                                                                                   | spxA2                                                                                                                              | -0.82448 | -0.48613 | 0.35199  | 1 |
| SPV_0179                                                                                                                                                                                                                   | unknown                                                                                                                            | 0.42592  | -0.00557 | -0.41248 | 1 |
| SPV_0181, SPV_0182, SPV_0180                                                                                                                                                                                               | yqgF, unknown, unknown                                                                                                             | 0.18555  | -0.53610 | -0.70614 | 1 |
| SPV_0183                                                                                                                                                                                                                   | folC                                                                                                                               | -0.18140 | 0.02948  | 0.22148  | 1 |
| SPV_0184                                                                                                                                                                                                                   | unknown                                                                                                                            | -0.00190 | 0.06152  | 0.07873  | 1 |
| SPV_0185                                                                                                                                                                                                                   | cls                                                                                                                                | 0.17556  | -0.23744 | -0.39939 | 1 |
| SPV_0186                                                                                                                                                                                                                   | unknown                                                                                                                            | 0.14089  | -0.08215 | -0.20620 | 1 |
| SPV_0189, SPV_0187, SPV_0190, SPV_0191, SPV_0188                                                                                                                                                                           | unknown, nrdD, nrdG, unknown, unknown                                                                                              | -0.11068 | -0.02552 | 0.09966  | 1 |
| SPV_0191                                                                                                                                                                                                                   | unknown                                                                                                                            | 0.24007  | 0.10513  | -0.12004 | 1 |
| SPV_0210, SPV_0204, SPV_0213, SPV_0206, SPV_0203, SPV_0209, SPV_0196, SPV_0192, SPV_0211, SPV_0194, SPV_0208, SPV_0202, SPV_0200, SPV_0212, SPV_0195, SPV_0199, SPV_0193, SPV_0201, SPV_0198, SPV_0205, SPV_0207, SPV_0197 | rpsE, rplX, secY, rpsN, rplN, rplR, rplB, rpsJ, rpmD, rplD, rplF, rpsQ, rplP, rplO, rplW, rpsC, rplC, rpmC, rplV, rplE, rpsH, rpsS | -3.63622 | -2.97779 | 0.67464  | 1 |
| SPV_0210, SPV_0204, SPV_0213, SPV_0206, SPV_0203, SPV_0209, SPV_0196, SPV_0211, SPV_0194, SPV_0208, SPV_0202, SPV_0200, SPV_0212, SPV_0195, SPV_0199, SPV_0193, SPV_0201, SPV_0198, SPV_0205, SPV_0207, SPV_0197           | rpsE, rplX, secY, rpsN, rplN, rplR, rplB, rpmD, rplD, rplF, rpsQ, rplP, rplO, rplW, rpsC, rplC, rpmC, rplV, rplE, rpsH, rpsS       | -0.43576 | -0.07678 | 0.36886  | 1 |



|                                                                                                                                  |                                                                              |          |          |          |   |
|----------------------------------------------------------------------------------------------------------------------------------|------------------------------------------------------------------------------|----------|----------|----------|---|
| SPV_0210, SPV_0204, SPV_0213, SPV_0206, SPV_0203, SPV_0209, SPV_0211, SPV_0208, SPV_0202, SPV_0212, SPV_0201, SPV_0205, SPV_0207 | rpsE, rplX, secY, rpsN, rplN, rplR, rpmD, rplF, rpsQ, rplO, rpmC, rplE, rpsH | -3.87978 | -3.12225 | 0.77014  | 1 |
| SPV_0214                                                                                                                         | adk                                                                          | -2.91157 | -1.76949 | 1.16353  | 1 |
| SPV_0218, SPV_0217, SPV_0216, SPV_0219, SPV_0215, SPV_2122                                                                       | rpoA, rpsK, rpsM, rplQ, infA, rpmJ                                           | -3.20607 | -2.55720 | 0.66782  | 1 |
| SPV_0220, SPV_0221                                                                                                               | unknown, unknown                                                             | -0.07474 | 0.09267  | 0.18442  | 1 |
| SPV_0222                                                                                                                         | gpmB1                                                                        | -0.00926 | 0.08474  | 0.10061  | 1 |
| SPV_0225                                                                                                                         | unknown                                                                      | 0.20737  | 0.01988  | -0.18005 | 1 |
| SPV_0229, SPV_0228                                                                                                               | unknown, unknown                                                             | 0.12385  | -0.05011 | -0.15444 | 1 |
| SPV_0230                                                                                                                         | deoR                                                                         | 0.06195  | 0.04663  | 0.00167  | 1 |
| SPV_0231                                                                                                                         | unknown                                                                      | -0.02640 | 0.05736  | 0.09501  | 1 |
| SPV_0232                                                                                                                         | unknown                                                                      | 0.18563  | 0.01399  | -0.15263 | 1 |
| SPV_0233                                                                                                                         | unknown                                                                      | -0.05175 | 0.18960  | 0.25043  | 1 |
| SPV_0234                                                                                                                         | unknown                                                                      | -0.19636 | 0.06000  | 0.26882  | 1 |
| SPV_0235                                                                                                                         | unknown                                                                      | 0.03273  | 0.05266  | 0.03399  | 1 |
| SPV_0236                                                                                                                         | talC                                                                         | 0.12664  | 0.00335  | -0.10987 | 1 |
| SPV_0237                                                                                                                         | gldA                                                                         | 0.03269  | 0.00016  | -0.02383 | 1 |
| SPV_0238                                                                                                                         | leuS                                                                         | -2.81320 | -1.88731 | 0.93930  | 1 |
| SPV_0239                                                                                                                         | unknown                                                                      | 0.03761  | 0.07136  | 0.04797  | 1 |
| SPV_0240                                                                                                                         | unknown                                                                      | 0.25363  | 0.03038  | -0.20578 | 1 |
| SPV_0241                                                                                                                         | ruvB                                                                         | -0.04621 | -0.32302 | -0.25515 | 1 |
| SPV_0242                                                                                                                         | unknown                                                                      | -2.57690 | -1.34596 | 1.24210  | 1 |
| SPV_0247                                                                                                                         | bglA                                                                         | 0.28680  | 0.03702  | -0.22748 | 1 |
| SPV_0249                                                                                                                         | unknown                                                                      | 0.26918  | 0.09006  | -0.16076 | 1 |
| SPV_0250                                                                                                                         | spuA                                                                         | 0.28915  | 0.15102  | -0.11746 | 1 |
| SPV_0251, SPV_0252                                                                                                               | rpsL, rpsG                                                                   | -3.96070 | -2.85478 | 1.11989  | 1 |
| SPV_0253                                                                                                                         | fusA                                                                         | -2.73332 | -2.44312 | 0.30405  | 1 |
| SPV_0254                                                                                                                         | polC                                                                         | -1.89947 | -1.11847 | 0.78593  | 1 |
| SPV_0255                                                                                                                         | spb1                                                                         | 0.16283  | 0.02636  | -0.12396 | 1 |
| SPV_0256                                                                                                                         | relE1                                                                        | -0.23048 | -0.05823 | 0.18548  | 1 |
| SPV_0257                                                                                                                         | unknown                                                                      | -0.00551 | 0.13954  | 0.15884  | 1 |
| SPV_0258                                                                                                                         | pepS                                                                         | 0.20382  | 0.13967  | -0.05038 | 1 |
| SPV_0259                                                                                                                         | unknown                                                                      | 0.09062  | 0.04130  | -0.03832 | 1 |
| SPV_0260                                                                                                                         | rsuA-1                                                                       | 0.22743  | 0.07510  | -0.13665 | 1 |
| SPV_0261                                                                                                                         | pepC                                                                         | 0.07948  | -0.02226 | -0.08659 | 1 |
| SPV_0262, SPV_0263, SPV_0264                                                                                                     | manN, manM, manL                                                             | -0.06821 | 0.11662  | 0.19813  | 1 |
| SPV_0265                                                                                                                         | adhA                                                                         | -0.03893 | 0.03450  | 0.08308  | 1 |
| SPV_0266                                                                                                                         | unknown                                                                      | -0.03319 | 0.04181  | 0.08934  | 1 |
| SPV_0267                                                                                                                         | unknown                                                                      | 0.22413  | 0.02205  | -0.18846 | 1 |
| SPV_0268                                                                                                                         | unknown                                                                      | 0.09156  | -0.08937 | -0.16201 | 1 |
| SPV_0269                                                                                                                         | sulA                                                                         | -1.28587 | -0.33511 | 0.95684  | 1 |
| SPV_0270                                                                                                                         | sulB                                                                         | -1.10273 | -0.22310 | 0.89389  | 1 |
| SPV_0271                                                                                                                         | sulC                                                                         | -1.21005 | -0.11633 | 1.10562  | 1 |
| SPV_0272                                                                                                                         | sulD                                                                         | -0.16295 | 0.07456  | 0.25938  | 1 |
| SPV_0273                                                                                                                         | unknown                                                                      | 0.10487  | 0.04762  | -0.04869 | 1 |
| SPV_0274, SPV_0275                                                                                                               | rplM, rpsI                                                                   | -3.38618 | -2.59039 | 0.81158  | 1 |
| SPV_0276                                                                                                                         | unknown                                                                      | 0.13739  | 0.18552  | 0.06196  | 1 |
| SPV_0283, SPV_0280, SPV_0278, SPV_0277, SPV_0281, SPV_0279, SPV_0282                                                             | celD, celR, unknown, celA, celC, celB, unknown                               | 0.03771  | 0.18629  | 0.16386  | 1 |
| SPV_0283, SPV_0280, SPV_0281, SPV_0279, SPV_0282                                                                                 | celD, celR, celC, celB, unknown                                              | 0.07666  | 0.03227  | -0.02597 | 1 |
| SPV_0283, SPV_0280, SPV_0281, SPV_0282                                                                                           | celD, celR, celC, unknown                                                    | 0.03469  | 0.11611  | 0.09213  | 1 |
| SPV_0284                                                                                                                         | unknown                                                                      | 0.14922  | 0.06032  | -0.08200 | 1 |
| SPV_0285                                                                                                                         | unknown                                                                      | 0.08721  | 0.11821  | 0.04326  | 1 |
| SPV_0286                                                                                                                         | basA                                                                         | 0.05982  | 0.10308  | 0.06014  | 1 |
| SPV_0287                                                                                                                         | spnHL                                                                        | 0.13870  | 0.03617  | -0.08699 | 1 |
| SPV_0289, SPV_0290, SPV_0291, SPV_0292                                                                                           | eda, unknown, unknown, unknown                                               | -0.04923 | 0.05354  | 0.11503  | 1 |
| SPV_0293                                                                                                                         | unknown                                                                      | 0.20802  | -0.09008 | -0.28112 | 1 |
| SPV_0294                                                                                                                         | ugl                                                                          | 0.00278  | 0.14041  | 0.15015  | 1 |
| SPV_0295                                                                                                                         | unknown                                                                      | 0.20158  | 0.00847  | -0.17283 | 1 |
| SPV_0296                                                                                                                         | unknown                                                                      | 0.14614  | 0.11207  | -0.02300 | 1 |
| SPV_0297                                                                                                                         | unknown                                                                      | -0.10446 | 0.11126  | 0.22653  | 1 |

|                                                                                                                                                                |                                                                                                                |          |          |          |   |
|----------------------------------------------------------------------------------------------------------------------------------------------------------------|----------------------------------------------------------------------------------------------------------------|----------|----------|----------|---|
| SPV_0298                                                                                                                                                       | yajC-1                                                                                                         | 0.12348  | 0.05316  | -0.05029 | 1 |
| SPV_0301                                                                                                                                                       | regR                                                                                                           | 0.02630  | 0.01488  | 0.00486  | 1 |
| SPV_0302                                                                                                                                                       | unknown                                                                                                        | 0.18554  | -0.04205 | -0.21411 | 1 |
| SPV_0303                                                                                                                                                       | unknown                                                                                                        | 0.22515  | 0.01381  | -0.19721 | 1 |
| SPV_0304                                                                                                                                                       | mraW                                                                                                           | -6.58252 | -4.96591 | 1.59861  | 1 |
| SPV_0305                                                                                                                                                       | ftsL                                                                                                           | -6.37725 | -4.98683 | 1.40334  | 1 |
| SPV_0307, SPV_0306                                                                                                                                             | mraY, pbp2x                                                                                                    | -5.55005 | -4.60387 | 0.96889  | 1 |
| SPV_0308                                                                                                                                                       | clpL                                                                                                           | 0.14329  | 0.02380  | -0.10231 | 1 |
| SPV_0309                                                                                                                                                       | luxS                                                                                                           | 0.00439  | -0.06003 | -0.04781 | 1 |
| SPV_0310                                                                                                                                                       | unknown                                                                                                        | -0.03550 | 0.06892  | 0.12006  | 1 |
| SPV_0311, SPV_0313                                                                                                                                             | dexB, unknown                                                                                                  | -0.09099 | 0.06623  | 0.17048  | 1 |
| SPV_0326, SPV_0329, SPV_0330, SPV_0323, SPV_0320, SPV_0317, SPV_0315, SPV_0319, SPV_0324, SPV_0328, SPV_0321, SPV_0322, SPV_0316, SPV_0327, SPV_0318, SPV_0325 | cps2K, cps2M, cps2N, cps2H, cps2T, cps2C, cps2A, cps2E, cps2I, cps2L, cps2F, cps2G, cps2B, cps2P, cps2D, cps2J | 0.34644  | 0.57611  | 0.23666  | 1 |
| SPV_0326, SPV_0329, SPV_0330, SPV_0323, SPV_0324, SPV_0328, SPV_0321, SPV_0322, SPV_0327, SPV_0325                                                             | cps2K, cps2M, cps2N, cps2H, cps2I, cps2L, cps2F, cps2G, cps2P, cps2J                                           | 0.37310  | 0.36427  | 0.00362  | 1 |
| SPV_0331                                                                                                                                                       | cps2O                                                                                                          | -0.53262 | -0.62518 | -0.07676 | 1 |
| SPV_0334                                                                                                                                                       | aliA                                                                                                           | 0.07127  | 0.07356  | 0.01649  | 1 |
| SPV_0335                                                                                                                                                       | eng                                                                                                            | 0.12040  | -0.05158 | -0.15339 | 1 |
| SPV_0337, SPV_0336                                                                                                                                             | recU, pbp1a                                                                                                    | -0.49687 | -0.61120 | -0.10342 | 1 |
| SPV_0338                                                                                                                                                       | unknown                                                                                                        | -0.00921 | 0.03462  | 0.05914  | 1 |
| SPV_0339                                                                                                                                                       | gpsB                                                                                                           | -1.73158 | -0.50203 | 1.25508  | 1 |
| SPV_0340                                                                                                                                                       | rnpB                                                                                                           | -2.05910 | -0.94412 | 1.12723  | 1 |
| SPV_0341                                                                                                                                                       | rimL                                                                                                           | -0.00587 | -0.20645 | -0.18668 | 1 |
| SPV_0342                                                                                                                                                       | mapZ                                                                                                           | -0.08648 | -0.25995 | -0.15998 | 1 |
| SPV_0344, SPV_0343                                                                                                                                             | ritR, gnd                                                                                                      | -4.07428 | -2.53280 | 1.55838  | 1 |
| SPV_0345                                                                                                                                                       | cbpF                                                                                                           | 0.27566  | 0.05064  | -0.20944 | 1 |
| SPV_0352, SPV_2148, SPV_0350, SPV_0351                                                                                                                         | vraR, alkD, vraT, vraS                                                                                         | 0.09689  | -0.12111 | -0.20589 | 1 |
| SPV_0355, SPV_0357, SPV_0356                                                                                                                                   | unknown, cbpK, cbpG                                                                                            | 0.01664  | 0.09716  | 0.09650  | 1 |
| SPV_0358                                                                                                                                                       | unknown                                                                                                        | 0.29688  | -0.08751 | -0.37134 | 1 |
| SPV_0360                                                                                                                                                       | mtlA                                                                                                           | -0.02763 | -0.00423 | 0.03783  | 1 |
| SPV_0361                                                                                                                                                       | mtlR                                                                                                           | -0.10601 | -0.02359 | 0.09456  | 1 |
| SPV_0362                                                                                                                                                       | mtlA2                                                                                                          | 0.30639  | 0.01025  | -0.28032 | 1 |
| SPV_0363                                                                                                                                                       | mtlD                                                                                                           | 0.20708  | 0.14682  | -0.04485 | 1 |
| SPV_0364                                                                                                                                                       | unknown                                                                                                        | 0.21433  | 0.10866  | -0.09176 | 1 |
| SPV_0365                                                                                                                                                       | tig                                                                                                            | -0.07710 | -0.54365 | -0.45267 | 1 |
| SPV_0366                                                                                                                                                       | yrrC                                                                                                           | 0.11179  | -0.16587 | -0.26078 | 1 |
| SPV_0367, SPV_0368                                                                                                                                             | lepB, rnhC                                                                                                     | -1.43412 | -0.78629 | 0.66173  | 1 |
| SPV_0370, SPV_0369                                                                                                                                             | zapB, zapA                                                                                                     | 0.06697  | -0.09311 | -0.14447 | 1 |
| SPV_0371                                                                                                                                                       | mutS2                                                                                                          | 0.07682  | 0.00928  | -0.05502 | 1 |
| SPV_0372                                                                                                                                                       | glyP                                                                                                           | -0.17912 | -0.22218 | -0.02580 | 1 |
| SPV_0373                                                                                                                                                       | mip                                                                                                            | 0.21579  | -0.04616 | -0.24255 | 1 |
| SPV_0374                                                                                                                                                       | shetA                                                                                                          | 0.28984  | 0.13805  | -0.14036 | 1 |
| SPV_0375                                                                                                                                                       | serS                                                                                                           | -2.35755 | -1.12159 | 1.25477  | 1 |
| SPV_0376, SPV_0375, SPV_0377                                                                                                                                   | manO, serS, lysC                                                                                               | -0.16951 | 0.18361  | 0.36561  | 1 |
| SPV_0380, SPV_0378, SPV_0379, SPV_0381                                                                                                                         | fabH, fabM, fabT, acpP                                                                                         | 0.13670  | 0.07010  | -0.05159 | 1 |
| SPV_0380, SPV_0379, SPV_0381                                                                                                                                   | fabH, fabT, acpP                                                                                               | -1.13298 | 0.07042  | 1.21433  | 1 |
| SPV_0385, SPV_0389, SPV_0388, SPV_0386, SPV_0383, SPV_0390, SPV_0384, SPV_0387, SPV_0382                                                                       | fabF, accD, accC, accB, fabD, accA, fabG1, fabZ, fabK                                                          | -0.77397 | -0.01569 | 0.77006  | 1 |
| SPV_0393, SPV_0395, SPV_0394                                                                                                                                   | nusB, efp, unknown                                                                                             | -0.59633 | -0.64154 | -0.03192 | 1 |
| SPV_0397, SPV_0398, SPV_0396                                                                                                                                   | gatA, gatC, gatB                                                                                               | -2.82509 | -1.63406 | 1.20899  | 1 |
| SPV_0399                                                                                                                                                       | prfC                                                                                                           | 0.14445  | -0.10518 | -0.23923 | 1 |
| SPV_0400                                                                                                                                                       | unknown                                                                                                        | -0.01860 | 0.02002  | 0.04937  | 1 |
| SPV_0401                                                                                                                                                       | rpmB                                                                                                           | -0.06776 | -0.12400 | -0.04493 | 1 |
| SPV_0402                                                                                                                                                       | asp23                                                                                                          | -0.16988 | 0.05183  | 0.23942  | 1 |
| SPV_0403                                                                                                                                                       | unknown                                                                                                        | -0.72419 | 0.02993  | 0.76777  | 1 |
| SPV_0404, SPV_0406, SPV_2159, SPV_0405, SPV_0408                                                                                                               | ilvB, ilvC, unknown, ilvH, unknown                                                                             | 0.25748  | 0.05257  | -0.19343 | 1 |
| SPV_0409                                                                                                                                                       | ilvA                                                                                                           | -0.04539 | 0.07936  | 0.13685  | 1 |
| SPV_0410                                                                                                                                                       | unknown                                                                                                        | 0.06594  | -0.52094 | -0.57124 | 1 |

|                                                            |                                          |          |          |          |   |
|------------------------------------------------------------|------------------------------------------|----------|----------|----------|---|
| SPV_0412, SPV_0411                                         | glnHP1, glnQ1                            | 0.28242  | 0.17193  | -0.09530 | 1 |
| SPV_0413                                                   | unknown                                  | 0.09110  | 0.13602  | 0.05953  | 1 |
| SPV_0414                                                   | unknown                                  | -0.05549 | 0.00900  | 0.07849  | 1 |
| SPV_0417                                                   | uppP                                     | -0.08128 | 0.43174  | 0.52786  | 1 |
| SPV_0418                                                   | unknown                                  | -0.12997 | 0.15774  | 0.29774  | 1 |
| SPV_0419                                                   | dinP                                     | 0.05788  | -0.04646 | -0.08952 | 1 |
| SPV_0420                                                   | pfl                                      | 0.45774  | 0.07944  | -0.37325 | 1 |
| SPV_0422                                                   | unknown                                  | 0.26254  | -0.10224 | -0.34890 | 1 |
| SPV_0423                                                   | xylR                                     | 0.23092  | 0.15477  | -0.05900 | 1 |
| SPV_0424                                                   | unknown                                  | 0.10311  | -0.05218 | -0.14279 | 1 |
| SPV_0425                                                   | unknown                                  | 0.11161  | 0.09851  | 0.01008  | 1 |
| SPV_0426                                                   | lacF-1                                   | -0.15460 | 0.15099  | 0.31843  | 1 |
| SPV_0427                                                   | lacG-1                                   | 0.02227  | 0.06471  | 0.05444  | 1 |
| SPV_0428                                                   | lacE-1                                   | 0.02728  | 0.11501  | 0.09865  | 1 |
| SPV_0429, SPV_0430                                         | trkH, trkA                               | 0.58664  | -0.13824 | -0.71186 | 1 |
| SPV_0431                                                   | unknown                                  | 0.15054  | 0.05768  | -0.08120 | 1 |
| SPV_0432                                                   | mtsA                                     | 0.11331  | 0.01480  | -0.08612 | 1 |
| SPV_0433                                                   | unknown                                  | -0.05947 | 0.29641  | 0.36973  | 1 |
| SPV_0434                                                   | mtsB                                     | 0.14951  | 0.07275  | -0.05823 | 1 |
| SPV_0435                                                   | mtsC                                     | 0.14255  | 0.03691  | -0.08856 | 1 |
| SPV_0436                                                   | cspR                                     | 0.15446  | 0.06780  | -0.07622 | 1 |
| SPV_0438                                                   | unknown                                  | -0.10839 | -0.01015 | 0.11607  | 1 |
| SPV_0439                                                   | unknown                                  | -0.02984 | -0.13167 | -0.09279 | 1 |
| SPV_0440                                                   | unknown                                  | -0.02933 | -0.01177 | 0.03434  | 1 |
| SPV_0441                                                   | rpoE                                     | -1.83291 | -0.99776 | 0.85037  | 1 |
| SPV_0442                                                   | pyrG                                     | 0.34006  | -0.01387 | -0.33841 | 1 |
| SPV_0443                                                   | nptA                                     | 0.02284  | -0.40834 | -0.42017 | 1 |
| SPV_0444                                                   | endoD                                    | 0.15320  | 0.13504  | -0.00568 | 1 |
| SPV_0445                                                   | pgk                                      | -0.81264 | -0.38398 | 0.44499  | 1 |
| SPV_0446                                                   | unknown                                  | 0.05472  | 0.24296  | 0.20510  | 1 |
| SPV_0447, SPV_0448                                         | glnR, glnA                               | 0.00704  | 0.36223  | 0.36884  | 1 |
| SPV_0449                                                   | unknown                                  | 0.14123  | 0.07323  | -0.05400 | 1 |
| SPV_0452                                                   | creX                                     | -0.02768 | -0.07400 | -0.03408 | 1 |
| SPV_0453                                                   | unknown                                  | 0.06503  | 0.08365  | 0.03369  | 1 |
| SPV_0455, SPV_0454, SPV_2170                               | hsdR, hsdM, hsdS-F                       | -0.08873 | 0.05944  | 0.16494  | 1 |
| SPV_0456                                                   | unknown                                  | 0.06306  | -0.07847 | -0.12931 | 1 |
| SPV_0457                                                   | unknown                                  | 0.04632  | 0.07274  | 0.04300  | 1 |
| SPV_0458, SPV_0460, SPV_0459, SPV_0461, SPV_2171           | hrcA, dnaK, grpE, dnaJ, unknown          | -0.11540 | -0.21046 | -0.07891 | 1 |
| SPV_0463, SPV_0462                                         | unknown, unknown                         | 0.13936  | 0.03654  | -0.09253 | 1 |
| SPV_0464, SPV_0465                                         | ecsA, ecsB                               | 0.10041  | 0.05241  | -0.03143 | 1 |
| SPV_0466                                                   | blpT                                     | -0.02233 | 0.11618  | 0.15940  | 1 |
| SPV_0467, SPV_0468, SPV_0469                               | blpS, blpR, blpH                         | -0.04846 | 0.01196  | 0.06803  | 1 |
| SPV_0470, SPV_0471, SPV_0472                               | blpC, blpB, blpA                         | 0.21683  | 0.01138  | -0.19202 | 1 |
| SPV_0475, SPV_2176, SPV_0474, SPV_0473                     | pncP, pncW, blpZ, blpY                   | 0.01410  | 0.11327  | 0.11524  | 1 |
| SPV_0482, SPV_0480, SPV_0478, SPV_0483, SPV_0481, SPV_0479 | infB, unknown, rimP, rbfA, unknown, nusA | -1.27275 | -0.16381 | 1.12372  | 1 |
| SPV_0484                                                   | unknown                                  | 0.10492  | 0.02840  | -0.05774 | 1 |
| SPV_0485                                                   | unknown                                  | -0.07502 | 0.08955  | 0.17929  | 1 |
| SPV_0486                                                   | unknown                                  | -0.02167 | -0.02499 | 0.01411  | 1 |
| SPV_0487, SPV_0488                                         | unknown, unknown                         | 0.00428  | -0.03228 | -0.02034 | 1 |
| SPV_0489                                                   | unknown                                  | -0.14977 | 0.12619  | 0.29077  | 1 |
| SPV_0490                                                   | unknown                                  | -0.03522 | -0.09135 | -0.04469 | 1 |
| SPV_0493                                                   | unknown                                  | -2.59525 | -1.14465 | 1.46753  | 1 |
| SPV_0494                                                   | valS                                     | -2.36302 | -1.10772 | 1.26657  | 1 |
| SPV_0496, SPV_0495                                         | unknown, unknown                         | -2.55889 | -2.12430 | 0.45166  | 1 |
| SPV_0501                                                   | bglG                                     | 0.00549  | 0.10682  | 0.11507  | 1 |
| SPV_0502                                                   | bglF                                     | 0.18066  | 0.04900  | -0.11933 | 1 |
| SPV_0503                                                   | bglA-2                                   | 0.04343  | 0.09364  | 0.05806  | 1 |
| SPV_0504, SPV_0505                                         | pheS, paiA                               | -1.54581 | -0.72243 | 0.83476  | 1 |
| SPV_0507                                                   | unknown                                  | 0.02884  | 0.10551  | 0.08713  | 1 |
| SPV_0508                                                   | unknown                                  | -0.18913 | 0.08887  | 0.28955  | 1 |
| SPV_0509                                                   | higA                                     | 0.05167  | 0.04235  | 0.00923  | 1 |
| SPV_0510, SPV_0511                                         | metE, metF                               | 0.11407  | 0.00544  | -0.09685 | 1 |
| SPV_0512, SPV_0516, SPV_0513, SPV_0517, SPV_0514, SPV_0515 | pnp, mrnC, cysE, unknown, unknown, cysS  | -1.75566 | -0.77501 | 0.99155  | 1 |
| SPV_0523, SPV_0522, SPV_0521                               | vex3, vex2, vex1                         | 0.04216  | 0.08388  | 0.05705  | 1 |

|                                                  |                                   |          |          |          |   |
|--------------------------------------------------|-----------------------------------|----------|----------|----------|---|
| SPV_0525, SPV_0524                               | vncS, vncR                        | 0.04919  | -0.05010 | -0.07849 | 1 |
| SPV_0527                                         | unknown                           | 0.22916  | 0.03902  | -0.17091 | 1 |
| SPV_0531, SPV_0529, SPV_0528, SPV_0530           | glnQ2, glnP2a, glnP2b, glnH2      | 0.07257  | 0.08752  | 0.02677  | 1 |
| SPV_0532                                         | recJ                              | 0.08371  | -0.01361 | -0.08565 | 1 |
| SPV_0533                                         | rnjB                              | -1.58751 | -0.37082 | 1.22999  | 1 |
| SPV_0534                                         | estA                              | 0.00561  | 0.14064  | 0.14673  | 1 |
| SPV_0535, SPV_0536                               | murM, murN                        | 0.11470  | 0.37268  | 0.27268  | 1 |
| SPV_0537                                         | unknown                           | 0.14950  | 0.08780  | -0.04606 | 1 |
| SPV_0539, SPV_0538                               | unknown, uvrC                     | 0.03502  | 0.00132  | -0.01996 | 1 |
| SPV_0540                                         | unknown                           | 0.21167  | 0.01556  | -0.18551 | 1 |
| SPV_0542, SPV_0541                               | pepV, nrd                         | -0.21149 | -0.21147 | 0.01532  | 1 |
| SPV_0543                                         | unknown                           | -0.07820 | -0.01726 | 0.07432  | 1 |
| SPV_0546                                         | brnQ                              | 0.05477  | 0.10710  | 0.06652  | 1 |
| SPV_0548, SPV_0547, SPV_0549                     | unknown, unknown, ldcB            | 0.03469  | 0.14425  | 0.12221  | 1 |
| SPV_0550, SPV_0551                               | rplK, rplA                        | -2.34347 | -1.18926 | 1.17160  | 1 |
| SPV_0552                                         | unknown                           | 0.03475  | 0.07458  | 0.05252  | 1 |
| SPV_0553                                         | unknown                           | -0.02051 | 0.03486  | 0.06677  | 1 |
| SPV_0554                                         | unknown                           | 0.13617  | 0.04512  | -0.07718 | 1 |
| SPV_0555                                         | unknown                           | 0.28349  | 0.10408  | -0.16479 | 1 |
| SPV_0556                                         | unknown                           | 0.09684  | 0.08425  | 0.00148  | 1 |
| SPV_0557                                         | unknown                           | 0.05433  | 0.14968  | 0.10862  | 1 |
| SPV_0558                                         | prtA                              | 0.46555  | 0.47523  | 0.02781  | 1 |
| SPV_0561, SPV_0560, SPV_0562, SPV_0559           | unknown, unknown, bgaA, unknown   | 0.05537  | 0.07374  | 0.03530  | 1 |
| SPV_0563                                         | unknown                           | 0.02600  | 0.10879  | 0.09399  | 1 |
| SPV_0564                                         | unknown                           | -0.02262 | 0.28166  | 0.31775  | 1 |
| SPV_0567                                         | ytqB                              | -0.00334 | 0.10975  | 0.12758  | 1 |
| SPV_0568                                         | unknown                           | 0.06939  | 0.15578  | 0.10056  | 1 |
| SPV_0569                                         | nha2                              | 0.16565  | 0.05754  | -0.09109 | 1 |
| SPV_0570                                         | yihY                              | -0.00415 | 0.05909  | 0.07240  | 1 |
| SPV_0573, SPV_0572, SPV_0571                     | mnrAB2, unknown, ccdA-1           | -0.00427 | -0.00571 | 0.01597  | 1 |
| SPV_0575, SPV_0574                               | yesM, yesN                        | 0.05653  | 0.04247  | -0.00180 | 1 |
| SPV_0576                                         | ywlG                              | 0.13193  | 0.03114  | -0.08667 | 1 |
| SPV_0577                                         | zmpB                              | 0.08700  | 0.01374  | -0.05394 | 1 |
| SPV_0578                                         | pabB                              | 0.00672  | 0.04391  | 0.05157  | 1 |
| SPV_0579                                         | cbpL                              | 0.08114  | 0.05154  | -0.01505 | 1 |
| SPV_0580                                         | gki                               | -0.16347 | 0.04778  | 0.22525  | 1 |
| SPV_0581                                         | thyA                              | -1.10597 | -0.33562 | 0.78719  | 1 |
| SPV_0582                                         | unknown                           | 0.08123  | 0.01658  | -0.06244 | 1 |
| SPV_0585, SPV_0584, SPV_0586, SPV_0583, SPV_0587 | unknown, hflX, rnz, miaA, unknown | -0.30867 | -0.77679 | -0.45339 | 1 |
| SPV_0588                                         | mtaR                              | 0.04281  | 0.11922  | 0.09343  | 1 |
| SPV_0590, SPV_0589                               | unknown, unknown                  | -0.09307 | 0.12528  | 0.23074  | 1 |
| SPV_0591                                         | unknown                           | -0.07786 | 0.13795  | 0.22839  | 1 |
| SPV_0592                                         | rsuA-2                            | 0.34401  | 0.03819  | -0.28953 | 1 |
| SPV_0594, SPV_0593                               | unknown, typA                     | 0.09221  | -0.28433 | -0.36155 | 1 |
| SPV_0597, SPV_0596, SPV_0595                     | unknown, unknown, unknown         | 0.03128  | 0.01968  | 0.00304  | 1 |
| SPV_0599, SPV_0598                               | murG, murD                        | -5.39552 | -4.34685 | 1.06701  | 1 |
| SPV_0600                                         | divIB                             | -0.21389 | 0.55813  | 0.78886  | 1 |
| SPV_0601                                         | unknown                           | -0.09653 | 0.29296  | 0.39998  | 1 |
| SPV_0602                                         | unknown                           | 0.07468  | 0.36131  | 0.30360  | 1 |
| SPV_0605                                         | unknown                           | 0.11142  | -0.01486 | -0.11797 | 1 |
| SPV_0606                                         | unknown                           | -0.06722 | 0.14665  | 0.22570  | 1 |
| SPV_0607                                         | unknown                           | 0.18093  | 0.10768  | -0.05818 | 1 |
| SPV_0608, SPV_0610, SPV_0609                     | pyrF, unknown, pyrE               | -0.08780 | -0.02167 | 0.08092  | 1 |
| SPV_0610                                         | unknown                           | 0.33599  | 0.06150  | -0.25533 | 1 |
| SPV_0611                                         | unknown                           | 0.07579  | 0.18567  | 0.12537  | 1 |
| SPV_0612                                         | unknown                           | 0.10579  | 0.12533  | 0.03151  | 1 |
| SPV_0613                                         | unknown                           | -0.11827 | -0.12781 | -0.00151 | 1 |
| SPV_0614                                         | unknown                           | 0.09822  | -0.02576 | -0.10535 | 1 |
| SPV_0616, SPV_0618, SPV_0615, SPV_0617           | glnQ3, glnP3a, glnH3, glnP3b      | 0.08684  | -0.02191 | -0.09264 | 1 |
| SPV_0619                                         | unknown                           | -0.09685 | 0.09363  | 0.19988  | 1 |
| SPV_0620                                         | lysS                              | -2.05287 | -1.06378 | 1.00437  | 1 |
| SPV_0621                                         | lctO                              | 0.04107  | -0.07397 | -0.10284 | 1 |
| SPV_0623                                         | thiM-1                            | -0.03917 | 0.11266  | 0.16890  | 1 |
| SPV_0624                                         | thiE-1                            | -0.15252 | 0.11510  | 0.28019  | 1 |

|                              |                           |          |          |          |   |
|------------------------------|---------------------------|----------|----------|----------|---|
| SPV_0632                     | thiD                      | 0.09987  | 0.11622  | 0.02933  | 1 |
| SPV_0634, SPV_0635, SPV_0633 | cupA, ctpA, copY          | 0.17704  | -0.00759 | -0.17090 | 1 |
| SPV_0636                     | spxB                      | 0.13725  | -0.10783 | -0.23082 | 1 |
| SPV_0637                     | unknown                   | -0.06813 | 0.11425  | 0.19371  | 1 |
| SPV_0640                     | unknown                   | 0.14222  | -0.01585 | -0.14203 | 1 |
| SPV_0641                     | manA                      | -0.12257 | 0.04116  | 0.18020  | 1 |
| SPV_0642                     | unknown                   | 0.10912  | -0.01592 | -0.11247 | 1 |
| SPV_0643                     | unknown                   | -0.03928 | 0.08981  | 0.14159  | 1 |
| SPV_0644, SPV_0645           | unknown, unknown          | 0.20532  | 0.12372  | -0.05982 | 1 |
| SPV_0646                     | unknown                   | 0.15450  | 0.10223  | -0.03612 | 1 |
| SPV_0647, SPV_0648           | unknown, comEB            | 0.06314  | 0.08524  | 0.03380  | 1 |
| SPV_0649                     | upp                       | -0.74002 | -0.65872 | 0.09543  | 1 |
| SPV_0650                     | clpP                      | -0.18293 | -0.90231 | -0.70382 | 1 |
| SPV_0651                     | unknown                   | 0.35451  | 0.14163  | -0.19238 | 1 |
| SPV_0652                     | livJ                      | 0.29225  | 0.06582  | -0.20932 | 1 |
| SPV_0653                     | livH                      | 0.11417  | 0.05342  | -0.04117 | 1 |
| SPV_0654                     | livM                      | -0.07490 | 0.06079  | 0.15792  | 1 |
| SPV_0655                     | livG                      | 0.06357  | 0.06176  | 0.01413  | 1 |
| SPV_0656                     | livF                      | 0.28733  | 0.06701  | -0.19988 | 1 |
| SPV_0657                     | unknown                   | -0.11202 | -0.03024 | 0.09411  | 1 |
| SPV_0659, SPV_0660, SPV_2217 | ftsE, ftsX, NA            | -1.76081 | -1.88719 | -0.10769 | 1 |
| SPV_0661                     | malT                      | 0.11175  | 0.03133  | -0.06420 | 1 |
| SPV_0662                     | unknown                   | 0.08929  | 0.10076  | 0.02406  | 1 |
| SPV_0663                     | yqfR                      | -0.91709 | -0.45739 | 0.47140  | 1 |
| SPV_0666, SPV_0665           | holA, pyrDa               | 0.12448  | -0.00490 | -0.11475 | 1 |
| SPV_0667                     | sodA                      | 0.06261  | -0.11073 | -0.15097 | 1 |
| SPV_0668                     | unknown                   | -0.05124 | 0.13916  | 0.20143  | 1 |
| SPV_0669                     | rimN                      | 0.20592  | 0.02629  | -0.16566 | 1 |
| SPV_0670                     | unknown                   | 0.19043  | 0.01256  | -0.15848 | 1 |
| SPV_0671                     | unknown                   | 0.03263  | 0.07941  | 0.06032  | 1 |
| SPV_0672                     | ppiA                      | 0.10383  | 0.13405  | 0.04116  | 1 |
| SPV_0674, SPV_0675           | rpsP, khpA                | -3.24441 | -2.82587 | 0.43315  | 1 |
| SPV_0678                     | rimM                      | -0.13056 | 0.07339  | 0.21974  | 1 |
| SPV_0679                     | trmD                      | -0.11560 | 0.06344  | 0.19265  | 1 |
| SPV_0680                     | unknown                   | 0.34877  | 0.24287  | -0.09037 | 1 |
| SPV_0681                     | unknown                   | -0.08939 | -0.09688 | 0.00511  | 1 |
| SPV_0682                     | unknown                   | 0.20807  | 0.06665  | -0.12506 | 1 |
| SPV_0683                     | unknown                   | 0.26518  | 0.07058  | -0.18280 | 1 |
| SPV_0684                     | bioY                      | 0.18998  | -0.06564 | -0.23907 | 1 |
| SPV_0685                     | gor                       | 0.04774  | -0.00719 | -0.04165 | 1 |
| SPV_0686, SPV_0687, SPV_0688 | unknown, unknown, unknown | 0.28582  | 0.08643  | -0.18710 | 1 |
| SPV_0689                     | metG                      | -2.66448 | -1.43362 | 1.24792  | 1 |
| SPV_0690                     | unknown                   | 0.23304  | 0.06851  | -0.14863 | 1 |
| SPV_0691                     | unknown                   | -0.01946 | -0.06703 | -0.03237 | 1 |
| SPV_0692                     | unknown                   | 0.36476  | 0.03633  | -0.31220 | 1 |
| SPV_0693                     | unknown                   | -0.13141 | 0.11159  | 0.25242  | 1 |
| SPV_0695, SPV_0694           | fabG2, unknown            | -0.02913 | 0.03030  | 0.07393  | 1 |
| SPV_0696                     | unknown                   | 0.15133  | -0.00477 | -0.13915 | 1 |
| SPV_0697                     | unknown                   | 0.05887  | -0.11854 | -0.16305 | 1 |
| SPV_0698                     | unknown                   | 0.03254  | 0.02858  | 0.00724  | 1 |
| SPV_0699                     | unknown                   | -0.08544 | -0.05888 | 0.03914  | 1 |
| SPV_0700                     | pepN                      | -0.20406 | -0.05833 | 0.16336  | 1 |
| SPV_0701, SPV_0702           | ciaR, ciaH                | 0.02323  | 0.13885  | 0.12548  | 1 |
| SPV_0703                     | unknown                   | -0.10194 | 0.38352  | 0.49521  | 1 |
| SPV_0704                     | unknown                   | 0.09922  | 0.04377  | -0.04050 | 1 |
| SPV_0705                     | yoaA                      | 0.15721  | 0.11192  | -0.03019 | 1 |
| SPV_0706                     | rodA                      | 0.12079  | 0.03367  | -0.07480 | 1 |
| SPV_0707                     | thiJ                      | 0.18952  | 0.07192  | -0.09985 | 1 |
| SPV_0708                     | unknown                   | -2.88000 | -1.50163 | 1.38738  | 1 |
| SPV_0709                     | gyrB                      | -0.31422 | -0.10979 | 0.21904  | 1 |
| SPV_0710                     | ezrA                      | -1.83525 | -1.84176 | 0.00687  | 1 |
| SPV_0713                     | unknown                   | -0.42602 | 0.62595  | 1.06588  | 1 |
| SPV_0714                     | unknown                   | 0.16113  | 0.15351  | 0.00629  | 1 |
| SPV_0715                     | unknown                   | 0.12257  | 0.08312  | -0.02485 | 1 |
| SPV_0717                     | clpE                      | 0.17211  | 0.07195  | -0.08545 | 1 |
| SPV_0718                     | unknown                   | 0.04626  | -0.33313 | -0.36763 | 1 |
| SPV_0721, SPV_0720, SPV_0719 | folD, glnQ4, glnP4        | -0.32877 | 0.08487  | 0.42760  | 1 |
| SPV_0722                     | nnrD                      | -0.05890 | 0.06694  | 0.13910  | 1 |

|                                                  |                                       |          |          |          |   |
|--------------------------------------------------|---------------------------------------|----------|----------|----------|---|
| SPV_0723, SPV_0725, SPV_0726, SPV_0724           | rpiA, unknown, unknown, deoB          | 0.01175  | -0.10204 | -0.10059 | 1 |
| SPV_0729                                         | unknown                               | 0.10897  | 0.07969  | -0.01556 | 1 |
| SPV_0730                                         | deoD                                  | -0.04179 | 0.06694  | 0.12451  | 1 |
| SPV_0731                                         | flaR                                  | 0.22505  | 0.04508  | -0.16939 | 1 |
| SPV_0732                                         | rpsT                                  | 0.07220  | 0.02382  | -0.02981 | 1 |
| SPV_0733                                         | coaA                                  | -0.17535 | 0.13294  | 0.32120  | 1 |
| SPV_0734                                         | unknown                               | 0.16115  | 0.03356  | -0.11586 | 1 |
| SPV_0735                                         | unknown                               | -0.10449 | -0.01511 | 0.10139  | 1 |
| SPV_0736                                         | pdp                                   | 0.23669  | 0.05825  | -0.16661 | 1 |
| SPV_0738, SPV_0739, SPV_0737                     | cdd-1, unknown, deoC                  | 0.15020  | 0.20298  | 0.07089  | 1 |
| SPV_0740                                         | unknown                               | 0.10212  | -0.06046 | -0.14947 | 1 |
| SPV_0741                                         | unknown                               | 0.18515  | 0.19893  | 0.02900  | 1 |
| SPV_0742                                         | unknown                               | 0.07166  | 0.00888  | -0.04988 | 1 |
| SPV_0745                                         | plsY                                  | -0.96649 | -0.62627 | 0.35784  | 1 |
| SPV_0746                                         | parE                                  | -2.04661 | -1.53584 | 0.52587  | 1 |
| SPV_0747                                         | unknown                               | -1.22686 | -1.09338 | 0.14892  | 1 |
| SPV_0748                                         | parC                                  | -1.50164 | -1.54207 | -0.02488 | 1 |
| SPV_0750, SPV_0752, SPV_0751, SPV_0753, SPV_0749 | unknown, unknown, unknown, pcp1, ilvE | -0.15324 | -0.57492 | -0.40614 | 1 |
| SPV_0754, SPV_0755                               | unknown, tRNA-Tyr-1                   | 0.12409  | -0.35232 | -0.46047 | 1 |
| SPV_0755                                         | tRNA-Tyr-1                            | -1.95250 | -0.83243 | 1.13899  | 1 |
| SPV_0756                                         | tRNA-Gln-1                            | -3.64923 | -2.64520 | 1.02242  | 1 |
| SPV_0757                                         | rpsA                                  | -0.93129 | -0.56620 | 0.37863  | 1 |
| SPV_0758                                         | unknown                               | -0.06099 | 0.11537  | 0.18612  | 1 |
| SPV_0759                                         | unknown                               | -2.92287 | -1.71355 | 1.22284  | 1 |
| SPV_0760                                         | dnaX                                  | -2.69116 | -1.97302 | 0.73240  | 1 |
| SPV_0761                                         | unknown                               | -0.68513 | -0.47282 | 0.22292  | 1 |
| SPV_0764, SPV_0766, SPV_0763, SPV_0762, SPV_0765 | sufS, sufB, sufD, sufC, sufE2         | -0.02610 | 0.00058  | 0.04318  | 1 |
| SPV_0767                                         | pbp3                                  | 0.05063  | 0.27708  | 0.24283  | 1 |
| SPV_0768                                         | cozE                                  | -0.74983 | -0.46535 | 0.29760  | 1 |
| SPV_0769                                         | ssrA                                  | -0.03976 | -0.20404 | -0.15386 | 1 |
| SPV_0770                                         | tRNA-Ser-1                            | -0.00848 | 0.11496  | 0.13379  | 1 |
| SPV_0771, SPV_0772                               | fruR, fruB                            | -0.06030 | 0.00886  | 0.07858  | 1 |
| SPV_0773                                         | fruA                                  | 0.08329  | 0.12170  | 0.04721  | 1 |
| SPV_0775                                         | unknown                               | 0.19319  | 0.14414  | -0.03536 | 1 |
| SPV_0776, SPV_0777                               | unknown, thil                         | 0.07740  | 0.11536  | 0.05398  | 1 |
| SPV_0783, SPV_0782, SPV_0785, SPV_0784           | unknown, unknown, unknown, unknown    | 0.18164  | -0.04412 | -0.20727 | 1 |
| SPV_0785, SPV_0784                               | unknown, unknown                      | 0.03158  | 0.04765  | 0.02994  | 1 |
| SPV_0786, SPV_0787                               | argR2, pepX                           | 0.03589  | -0.01077 | -0.03157 | 1 |
| SPV_0788                                         | dnaE                                  | -0.16385 | -0.03310 | 0.14422  | 1 |
| SPV_0789, SPV_0790                               | pfkA, pyk                             | -3.73243 | -3.12291 | 0.62504  | 1 |
| SPV_0790                                         | pyk                                   | -2.67211 | -2.71600 | -0.03308 | 1 |
| SPV_0792, SPV_0793                               | unknown, unknown                      | 0.07522  | 0.05587  | -0.00284 | 1 |
| SPV_0794                                         | unknown                               | 0.09956  | 0.00678  | -0.07504 | 1 |
| SPV_0795                                         | unknown                               | -0.10213 | 0.01632  | 0.13302  | 1 |
| SPV_0796                                         | unknown                               | 0.15129  | -0.06677 | -0.20471 | 1 |
| SPV_0797                                         | unknown                               | -0.06068 | 0.03329  | 0.10237  | 1 |
| SPV_0798                                         | unknown                               | 0.03551  | 0.03249  | 0.01321  | 1 |
| SPV_0799                                         | unknown                               | 0.01489  | -0.00109 | -0.00568 | 1 |
| SPV_0802                                         | tex                                   | 0.13966  | -0.05781 | -0.18412 | 1 |
| SPV_0803                                         | unknown                               | -0.00288 | 0.00578  | 0.02591  | 1 |
| SPV_0804                                         | unknown                               | 0.08093  | 0.02800  | -0.04029 | 1 |
| SPV_0805                                         | unknown                               | 0.18294  | 0.03274  | -0.13672 | 1 |
| SPV_0806                                         | unknown                               | 0.12169  | 0.13283  | 0.02728  | 1 |
| SPV_0807                                         | unknown                               | 0.08520  | 0.07103  | 0.00093  | 1 |
| SPV_0809                                         | cad                                   | 0.03672  | 0.03630  | 0.01362  | 1 |
| SPV_0810                                         | unknown                               | 0.01543  | 0.00706  | 0.00616  | 1 |
| SPV_0811                                         | speE                                  | -0.03760 | -0.11378 | -0.05932 | 1 |
| SPV_0812                                         | lys1                                  | 0.26365  | 0.05832  | -0.18898 | 1 |
| SPV_0813                                         | nspC                                  | 0.04590  | -0.01755 | -0.04931 | 1 |
| SPV_0814                                         | aguA                                  | 0.16035  | -0.04375 | -0.18902 | 1 |
| SPV_0815                                         | unknown                               | 0.11561  | 0.06575  | -0.03469 | 1 |
| SPV_0816                                         | unknown                               | 0.05828  | 0.11309  | 0.07048  | 1 |
| SPV_0819, SPV_0818                               | lspA, cmbR                            | 0.03753  | -0.05121 | -0.07315 | 1 |
| SPV_0820                                         | rluD1                                 | 0.22671  | -0.20005 | -0.41041 | 1 |

|                              |                        |          |          |          |   |
|------------------------------|------------------------|----------|----------|----------|---|
| SPV_0821                     | cbpE                   | 0.27456  | -0.00436 | -0.26661 | 1 |
| SPV_0822                     | proB                   | 0.04272  | 0.22925  | 0.20241  | 1 |
| SPV_0823                     | proA                   | -0.15775 | 0.15752  | 0.32756  | 1 |
| SPV_0824                     | proC                   | 0.36782  | 0.27499  | -0.07184 | 1 |
| SPV_0828                     | unknown                | 0.14399  | 1.14658  | 1.01869  | 1 |
| SPV_0829                     | unknown                | 0.03884  | 0.25941  | 0.23556  | 1 |
| SPV_0831                     | unknown                | 0.15779  | 0.06648  | -0.07755 | 1 |
| SPV_0833                     | trmFO                  | 0.08251  | -0.06628 | -0.13582 | 1 |
| SPV_0835                     | frr                    | -0.27657 | -0.51670 | -0.22439 | 1 |
| SPV_0836                     | unknown                | -0.09208 | -0.64375 | -0.53854 | 1 |
| SPV_0837                     | unknown                | 0.05024  | -0.04118 | -0.08005 | 1 |
| SPV_0838, SPV_2252, SPV_0839 | phoH, unknown, unknown | -0.16770 | 0.17423  | 0.35424  | 1 |
| SPV_0841                     | ald                    | -0.19006 | 0.07808  | 0.27864  | 1 |
| SPV_0842                     | unknown                | 0.10706  | 0.07002  | -0.02531 | 1 |
| SPV_0847                     | infC                   | -3.11600 | -2.06731 | 1.06371  | 1 |
| SPV_0848                     | rpmI                   | -3.50099 | -2.59448 | 0.91960  | 1 |
| SPV_0849                     | rplT                   | -2.56772 | -1.37239 | 1.20977  | 1 |
| SPV_0850                     | glcA                   | 0.07041  | -0.03459 | -0.09035 | 1 |
| SPV_0852, SPV_0853, SPV_0851 | pyrDb, lytB, pyrK      | 0.13468  | -0.02542 | -0.14674 | 1 |
| SPV_0853                     | lytB                   | 0.09781  | 0.04161  | -0.04172 | 1 |
| SPV_0854                     | pavA                   | -0.21518 | -0.02126 | 0.20695  | 1 |
| SPV_0855, SPV_0856           | ybeY, dgkA             | -1.12346 | -0.83801 | 0.29996  | 1 |
| SPV_0857                     | era                    | -0.61830 | -0.76992 | -0.14022 | 1 |
| SPV_0858                     | mutM                   | -0.53367 | -0.10443 | 0.44133  | 1 |
| SPV_0859                     | coaE                   | -0.25228 | -0.21225 | 0.05115  | 1 |
| SPV_0860                     | pmrA                   | -0.04866 | -0.08534 | -0.02069 | 1 |
| SPV_0861                     | secG                   | -1.11841 | -0.67313 | 0.45513  | 1 |
| SPV_0862                     | rnr                    | -0.16006 | -0.49784 | -0.32457 | 1 |
| SPV_0863                     | smpB                   | -0.29194 | -0.73928 | -0.43727 | 1 |
| SPV_0864                     | tehB                   | -0.11989 | -0.14025 | -0.00632 | 1 |
| SPV_0865                     | coiA                   | -0.03420 | 0.13541  | 0.18220  | 1 |
| SPV_0866, SPV_0867           | pepF1, unknown         | 0.02785  | 0.09026  | 0.07896  | 1 |
| SPV_0868                     | prsA                   | 0.23650  | 0.02161  | -0.20275 | 1 |
| SPV_0870                     | gpmB2                  | 0.04419  | 0.04544  | 0.01427  | 1 |
| SPV_0871, SPV_0872           | ebsC, unknown          | -0.10226 | 0.32871  | 0.44564  | 1 |
| SPV_0873                     | unknown                | 0.25917  | -0.02222 | -0.26605 | 1 |
| SPV_0875, SPV_0874           | unknown, glmU          | -1.52365 | -0.42915 | 1.10373  | 1 |
| SPV_0876                     | unknown                | -0.12561 | -0.54356 | -0.39946 | 1 |
| SPV_0877                     | mtnN                   | -0.03681 | -0.60151 | -0.54942 | 1 |
| SPV_0879                     | dnaQ                   | -0.06881 | -0.03292 | 0.04835  | 1 |
| SPV_0880                     | unknown                | -0.68829 | -0.19247 | 0.51327  | 1 |
| SPV_0883                     | unknown                | 0.01263  | -0.00520 | -0.00419 | 1 |
| SPV_0884                     | unknown                | 0.27587  | -0.00997 | -0.26589 | 1 |
| SPV_0886                     | unknown                | 0.10557  | 0.06811  | -0.02688 | 1 |
| SPV_0886, SPV_0885           | unknown, ccdA-2        | -0.01997 | 0.06518  | 0.09964  | 1 |
| SPV_0887                     | yfnA                   | 0.18586  | 0.01010  | -0.15778 | 1 |
| SPV_0890                     | phtE                   | 0.00705  | 0.06187  | 0.06640  | 1 |
| SPV_0894                     | pepT                   | 0.19613  | -0.11838 | -0.30432 | 1 |
| SPV_0895                     | hemH                   | 0.19057  | 0.08422  | -0.09543 | 1 |
| SPV_0896                     | mscL                   | 0.01663  | -0.02672 | -0.02857 | 1 |
| SPV_0897                     | mesH                   | 0.01117  | 0.13167  | 0.13456  | 1 |
| SPV_0898                     | queT                   | 0.06332  | 0.02167  | -0.03162 | 1 |
| SPV_0899                     | tRNA-Thr-1             | 0.06109  | 0.03710  | -0.01420 | 1 |
| SPV_0901, SPV_0900           | dapA, asd              | -0.06391 | 0.11736  | 0.19423  | 1 |
| SPV_0902                     | mnmE                   | -0.07492 | -0.31228 | -0.22393 | 1 |
| SPV_0903                     | xyIH                   | -0.12593 | 0.00380  | 0.14498  | 1 |
| SPV_0904                     | tdk                    | -0.89026 | -0.80697 | 0.09882  | 1 |
| SPV_0905                     | bltD                   | -1.09815 | -0.77353 | 0.33870  | 1 |
| SPV_0906                     | prfA                   | -0.70845 | -0.29180 | 0.43193  | 1 |
| SPV_0907                     | hemK                   | -0.75701 | -0.41071 | 0.35836  | 1 |
| SPV_0908                     | tsaC                   | -1.14381 | -0.41679 | 0.73800  | 1 |
| SPV_0909                     | unknown                | -0.73977 | -0.28146 | 0.47044  | 1 |
| SPV_0910                     | glyA                   | -0.20379 | 0.05880  | 0.27665  | 1 |
| SPV_0911                     | unknown                | -0.06733 | 0.34986  | 0.42826  | 1 |
| SPV_0912                     | pvaA                   | 0.01045  | 0.32857  | 0.33758  | 1 |
| SPV_0913                     | unknown                | -0.11670 | 0.13605  | 0.26692  | 1 |
| SPV_0914                     | rlmCD                  | 0.22663  | -0.24715 | -0.46038 | 1 |
| SPV_0920                     | unknown                | -0.10658 | -0.01632 | 0.09754  | 1 |

|                                        |                            |          |          |          |   |
|----------------------------------------|----------------------------|----------|----------|----------|---|
| SPV_0922, SPV_0921                     | unknown, ccrB              | -0.01413 | 0.10989  | 0.13982  | 1 |
| SPV_0923                               | unknown                    | 0.01382  | 0.10834  | 0.10578  | 1 |
| SPV_0924                               | unknown                    | -0.05461 | 0.03140  | 0.09779  | 1 |
| SPV_0925                               | unknown                    | 0.09480  | 0.00951  | -0.07438 | 1 |
| SPV_0926                               | unknown                    | 0.15569  | 0.02638  | -0.11056 | 1 |
| SPV_0934                               | unknown                    | 0.13367  | 0.01902  | -0.10120 | 1 |
| SPV_0935                               | unknown                    | 0.10468  | 0.13900  | 0.04142  | 1 |
| SPV_0939                               | mutR2                      | 0.01803  | 0.04113  | 0.03522  | 1 |
| SPV_0940                               | rffD                       | 0.31442  | -0.07627 | -0.37674 | 1 |
| SPV_0941                               | unknown                    | -0.05169 | 0.03985  | 0.10320  | 1 |
| SPV_0943                               | unknown                    | 0.17012  | -0.12346 | -0.27591 | 1 |
| SPV_0944                               | unknown                    | -0.06947 | 0.09562  | 0.17763  | 1 |
| SPV_0945                               | unknown                    | 0.12197  | 0.16973  | 0.06413  | 1 |
| SPV_0946                               | unknown                    | -0.03533 | 0.05617  | 0.10069  | 1 |
| SPV_0947                               | unknown                    | 0.10736  | 0.13970  | 0.05262  | 1 |
| SPV_0948                               | nikS                       | -0.00420 | -0.10373 | -0.08519 | 1 |
| SPV_0949                               | unknown                    | -0.03547 | 0.07714  | 0.12541  | 1 |
| SPV_0950                               | mefE                       | 0.02387  | 0.02027  | 0.01244  | 1 |
| SPV_0951                               | unknown                    | 0.10793  | -0.00648 | -0.09726 | 1 |
| SPV_0953, SPV_0952                     | ppc, ftsW                  | -0.92804 | -0.49642 | 0.44848  | 1 |
| SPV_0955                               | trpY                       | 0.12912  | 0.15210  | 0.03523  | 1 |
| SPV_0956                               | unknown                    | 0.36904  | 0.02534  | -0.33019 | 1 |
| SPV_0959, SPV_0957, SPV_0958           | unknown, dnaG, rpoD        | -2.98893 | -2.21109 | 0.78240  | 1 |
| SPV_0960                               | lafB                       | -0.66630 | -0.54597 | 0.13290  | 1 |
| SPV_0961                               | lafA                       | -0.30548 | -0.12400 | 0.19889  | 1 |
| SPV_0962                               | unknown                    | 0.03022  | 0.21479  | 0.20179  | 1 |
| SPV_0963                               | unknown                    | -1.02913 | -0.71623 | 0.32553  | 1 |
| SPV_0964                               | obgE                       | -0.62198 | -0.43853 | 0.20149  | 1 |
| SPV_0965                               | unknown                    | -0.62859 | -0.48472 | 0.15217  | 1 |
| SPV_0969                               | unknown                    | 0.25039  | -0.43712 | -0.67098 | 1 |
| SPV_0970                               | map                        | -0.05981 | -0.71993 | -0.64492 | 1 |
| SPV_0973                               | pcrA                       | -0.47836 | -0.47829 | 0.01486  | 1 |
| SPV_0975                               | radC                       | -0.03091 | 0.11725  | 0.15943  | 1 |
| SPV_0976, SPV_0974                     | rex, unknown               | 0.11946  | 0.11421  | 0.01533  | 1 |
| SPV_0977                               | unknown                    | 0.01181  | 0.05692  | 0.05355  | 1 |
| SPV_0978                               | unknown                    | 0.16464  | -0.08615 | -0.23184 | 1 |
| SPV_0979                               | nifS                       | -1.19294 | -0.82592 | 0.38215  | 1 |
| SPV_0980                               | prs2                       | -1.33514 | -0.78991 | 0.56214  | 1 |
| SPV_0981                               | unknown                    | 0.06071  | 0.06899  | 0.02169  | 1 |
| SPV_0983, SPV_0984, SPV_0982, SPV_0985 | ppnK, rluD3, unknown, eutD | -2.20726 | -1.30531 | 0.91383  | 1 |
| SPV_0986                               | unknown                    | -0.04630 | 0.08932  | 0.14695  | 1 |
| SPV_0987                               | unknown                    | 0.02239  | 0.10794  | 0.09939  | 1 |
| SPV_0988                               | unknown                    | 0.15868  | 0.04128  | -0.10453 | 1 |
| SPV_0989                               | rplU                       | -3.50302 | -2.58755 | 0.92879  | 1 |
| SPV_0990                               | unknown                    | -3.22686 | -2.46750 | 0.77357  | 1 |
| SPV_0991                               | rpmA                       | -2.93317 | -1.76804 | 1.17882  | 1 |
| SPV_0992                               | unknown                    | 0.28123  | 0.04411  | -0.22173 | 1 |
| SPV_0993                               | unknown                    | -0.04051 | -0.06628 | -0.00768 | 1 |
| SPV_0994                               | ribF                       | -1.56889 | -0.99119 | 0.59415  | 1 |
| SPV_0995                               | unknown                    | -0.04512 | 0.06130  | 0.12185  | 1 |
| SPV_0996                               | unknown                    | -0.03279 | -0.18003 | -0.13563 | 1 |
| SPV_0997                               | hlpA                       | -0.57284 | -1.61427 | -1.02428 | 1 |
| SPV_0999, SPV_0998, SPV_1000           | rggD, unknown, unknown     | 0.29277  | -0.05962 | -0.33481 | 1 |
| SPV_1000                               | unknown                    | 0.02394  | 0.06845  | 0.06180  | 1 |
| SPV_1001, SPV_1002                     | ligA, pulA                 | -0.43769 | -0.14641 | 0.30661  | 1 |
| SPV_1003                               | unknown                    | 0.12508  | 0.06227  | -0.05039 | 1 |
| SPV_1004                               | gapN                       | -0.20242 | 0.09035  | 0.30633  | 1 |
| SPV_1008, SPV_1007                     | glgA, glgD                 | 0.15530  | -0.02581 | -0.16233 | 1 |
| SPV_1008, SPV_1007, SPV_1005, SPV_1006 | glgA, glgD, glgB, glgC     | 0.11593  | 0.10053  | -0.00174 | 1 |
| SPV_1009                               | serB                       | 0.09154  | -0.07620 | -0.14683 | 1 |
| SPV_1010                               | unknown                    | 0.11048  | 0.05553  | -0.03989 | 1 |
| SPV_1011                               | glxK                       | -0.02698 | 0.10819  | 0.14958  | 1 |
| SPV_1012                               | eno                        | -2.43202 | -1.54925 | 0.89347  | 1 |
| SPV_1013                               | unknown                    | -0.00281 | 0.04479  | 0.06140  | 1 |
| SPV_1017, SPV_1015, SPV_1016           | unknown, rexB, rexA        | -0.09666 | -0.08992 | 0.01999  | 1 |
| SPV_1018                               | zmpA                       | 0.15568  | 0.04486  | -0.09687 | 1 |



|                                        |                                |          |          |          |   |
|----------------------------------------|--------------------------------|----------|----------|----------|---|
| SPV_1020, SPV_1019                     | rnhB, rbgA                     | -0.86895 | -0.30166 | 0.58259  | 1 |
| SPV_1021                               | unknown                        | 0.10876  | 0.08196  | -0.00654 | 1 |
| SPV_1023                               | xerS                           | 0.00523  | 0.01438  | 0.02621  | 1 |
| SPV_1024                               | lplA                           | -0.11395 | 0.14633  | 0.27287  | 1 |
| SPV_1025                               | acoL                           | 0.42460  | -0.08153 | -0.48753 | 1 |
| SPV_1026                               | acoC                           | 0.03217  | 0.13522  | 0.11717  | 1 |
| SPV_1027                               | acoB                           | 0.02570  | 0.12807  | 0.11730  | 1 |
| SPV_1028                               | acoA                           | 0.08813  | 0.00150  | -0.07121 | 1 |
| SPV_1029                               | pdrM                           | -0.20973 | 0.05838  | 0.27765  | 1 |
| SPV_1030, SPV_1032, SPV_1031           | pyrC, ung, mutX                | -0.06491 | -0.03216 | 0.04950  | 1 |
| SPV_1034, SPV_1033                     | unknown, unknown               | 0.04924  | 0.04595  | 0.00964  | 1 |
| SPV_1038                               | phtA                           | 0.06339  | -0.02192 | -0.07152 | 1 |
| SPV_1043                               | nrdf                           | -1.48964 | -0.64390 | 0.85964  | 1 |
| SPV_1044                               | lacR                           | -0.16257 | 0.06431  | 0.23958  | 1 |
| SPV_1046                               | lacG-2                         | 0.03463  | 0.00504  | -0.01263 | 1 |
| SPV_1047                               | lacE-2                         | 0.15984  | 0.09356  | -0.04984 | 1 |
| SPV_1048                               | lacF-2                         | 0.03758  | 0.03218  | -0.00026 | 1 |
| SPV_1049                               | lacT                           | 0.07356  | 0.02399  | -0.03714 | 1 |
| SPV_1053, SPV_1052, SPV_1051, SPV_2301 | lacA, lacB, lacC, lacD         | 0.17799  | 0.03976  | -0.11924 | 1 |
| SPV_1054                               | unknown                        | 0.19008  | -0.01677 | -0.19291 | 1 |
| SPV_1057                               | unknown                        | 0.03044  | 0.05276  | 0.03334  | 1 |
| SPV_1059                               | unknown                        | 0.33821  | 0.12006  | -0.19829 | 1 |
| SPV_1060                               | lepA                           | 0.06507  | 0.02102  | -0.02942 | 1 |
| SPV_1061                               | pphA                           | 0.22491  | 0.02613  | -0.18226 | 1 |
| SPV_1062                               | recN                           | -0.45381 | -0.67486 | -0.20389 | 1 |
| SPV_1063                               | ahrC                           | -0.33315 | -0.19648 | 0.15490  | 1 |
| SPV_1064, SPV_1065                     | unknown, ispA                  | -0.93927 | 0.04215  | 0.99303  | 1 |
| SPV_1066                               | xseB                           | -0.83303 | -0.01505 | 0.82986  | 1 |
| SPV_1067                               | xseA                           | -0.69296 | -0.12308 | 0.58175  | 1 |
| SPV_1068                               | udk                            | 0.19820  | -0.03150 | -0.20864 | 1 |
| SPV_1069                               | unknown                        | -0.15656 | 0.14265  | 0.31538  | 1 |
| SPV_1070                               | truB                           | -0.06465 | 0.03721  | 0.11749  | 1 |
| SPV_1071                               | unknown                        | -0.01042 | 0.02814  | 0.05315  | 1 |
| SPV_1072                               | unknown                        | -0.02111 | -0.13450 | -0.10080 | 1 |
| SPV_1075                               | nirC                           | 0.06338  | 0.04855  | -0.00585 | 1 |
| SPV_1076                               | srtA                           | -0.16064 | -0.13247 | 0.04146  | 1 |
| SPV_1077                               | gyrA                           | -1.69156 | -0.82506 | 0.88077  | 1 |
| SPV_1078                               | ldh                            | -0.42571 | -0.06680 | 0.37486  | 1 |
| SPV_1079                               | unknown                        | -0.02637 | 0.10943  | 0.15438  | 1 |
| SPV_1080, SPV_1079                     | unknown, unknown               | 0.14462  | 0.02360  | -0.10352 | 1 |
| SPV_1081, SPV_1082, SPV_1080, SPV_1079 | relE2, relB2, unknown, unknown | 0.29695  | -0.17364 | -0.45749 | 1 |
| SPV_1083, SPV_1085, SPV_1084           | vicX, vicR, vicK               | -2.46750 | -2.02247 | 0.46008  | 1 |
| SPV_1083, SPV_1085, SPV_1086, SPV_1084 | vicX, vicR, mutY, vicK         | -0.08092 | 0.12623  | 0.22266  | 1 |
| SPV_1087                               | fhs                            | -1.10450 | -0.13835 | 0.98237  | 1 |
| SPV_1090, SPV_1088, SPV_1089           | panT, coaB, coaC               | -0.03257 | 0.01381  | 0.05834  | 1 |
| SPV_1091, SPV_1093                     | niaX, niaR                     | 0.10542  | 0.18192  | 0.09469  | 1 |
| SPV_1092                               | unknown                        | -0.17111 | -0.00652 | 0.17812  | 1 |
| SPV_1093                               | niaR                           | 0.10788  | 0.08236  | -0.01413 | 1 |
| SPV_1094                               | unknown                        | 0.02295  | 0.02768  | 0.01838  | 1 |
| SPV_1095                               | unknown                        | 0.20152  | 0.05798  | -0.12088 | 1 |
| SPV_1096                               | uvrB                           | 0.32857  | -0.06391 | -0.37541 | 1 |
| SPV_1097                               | unknown                        | 0.04921  | 0.04303  | 0.00645  | 1 |
| SPV_1099, SPV_1098                     | glnQ5, glnHP5                  | -1.83679 | -0.55989 | 1.29076  | 1 |
| SPV_1100                               | zwf                            | -1.30042 | -0.46080 | 0.85350  | 1 |
| SPV_1101                               | ftsY                           | -0.05001 | -0.08465 | -0.01877 | 1 |
| SPV_1102                               | unknown                        | 0.11771  | -0.45656 | -0.56013 | 1 |
| SPV_1103                               | unknown                        | -0.19495 | -0.52000 | -0.30927 | 1 |
| SPV_1104                               | smc                            | -0.43910 | -0.67173 | -0.21541 | 1 |
| SPV_1105                               | rnc                            | -0.65944 | -0.34124 | 0.32836  | 1 |
| SPV_1107, SPV_1106                     | guaC, tRNA-Arg-1               | -0.05532 | 0.10846  | 0.17582  | 1 |
| SPV_1108                               | unknown                        | -0.06659 | 0.08055  | 0.15974  | 1 |
| SPV_1109                               | unknown                        | 0.06327  | -0.08187 | -0.12754 | 1 |
| SPV_1110                               | unknown                        | 0.29463  | 0.07695  | -0.20696 | 1 |
| SPV_1111                               | unknown                        | 0.07885  | 0.01640  | -0.04401 | 1 |
| SPV_1112                               | unknown                        | -0.02009 | 0.04234  | 0.07639  | 1 |

|                                                            |                                                      |          |          |          |   |
|------------------------------------------------------------|------------------------------------------------------|----------|----------|----------|---|
| SPV_1113                                                   | unknown                                              | 0.33592  | 0.01853  | -0.29804 | 1 |
| SPV_1115                                                   | leuB                                                 | 0.40073  | -0.01420 | -0.39658 | 1 |
| SPV_1116                                                   | leuA                                                 | 0.00601  | 0.00120  | 0.00995  | 1 |
| SPV_1117                                                   | unknown                                              | -0.01389 | 0.05142  | 0.07813  | 1 |
| SPV_1118                                                   | cutC                                                 | 0.06149  | 0.00327  | -0.04317 | 1 |
| SPV_1118, SPV_1119                                         | cutC, unknown                                        | 0.42172  | -0.04997 | -0.45828 | 1 |
| SPV_1120                                                   | topA                                                 | -0.32131 | -0.54344 | -0.20625 | 1 |
| SPV_1121                                                   | unknown                                              | -0.03312 | 0.16126  | 0.20125  | 1 |
| SPV_1122                                                   | dprA                                                 | 0.05762  | 0.14287  | 0.09380  | 1 |
| SPV_1130                                                   | licD2                                                | 0.00696  | 0.24682  | 0.25948  | 1 |
| SPV_1134, SPV_1131, SPV_1132, SPV_1133                     | pyrR, carB, carA, pyrB                               | -0.04836 | 0.04331  | 0.10515  | 1 |
| SPV_1135                                                   | nth                                                  | 0.30759  | -0.00129 | -0.29343 | 1 |
| SPV_1136                                                   | unknown                                              | 0.03733  | -0.08469 | -0.10762 | 1 |
| SPV_1137                                                   | unknown                                              | 0.44402  | -0.02962 | -0.46135 | 1 |
| SPV_1139, SPV_1138                                         | lemA, htpX                                           | 0.20624  | 0.04197  | -0.14828 | 1 |
| SPV_1140                                                   | rsmG                                                 | -0.04105 | 0.01127  | 0.06648  | 1 |
| SPV_1141                                                   | uraA                                                 | -0.05985 | 0.01044  | 0.08330  | 1 |
| SPV_1142                                                   | ffh                                                  | -0.40395 | -0.35188 | 0.06393  | 1 |
| SPV_1143                                                   | unknown                                              | -0.32737 | -0.38559 | -0.04556 | 1 |
| SPV_1144                                                   | unknown                                              | 0.19441  | -0.07728 | -0.25680 | 1 |
| SPV_1146, SPV_1145                                         | yidA, unknown                                        | 0.01151  | 0.20587  | 0.20697  | 1 |
| SPV_1147                                                   | tRNA-Arg-2                                           | 0.03177  | 0.10240  | 0.08992  | 1 |
| SPV_1148                                                   | rplS                                                 | -3.31667 | -2.61883 | 0.70763  | 1 |
| SPV_1151, SPV_1150, SPV_1149                               | unknown, crcB2, crcB1                                | 0.22637  | 0.01320  | -0.20153 | 1 |
| SPV_1152                                                   | fid                                                  | -0.10258 | -0.03430 | 0.08287  | 1 |
| SPV_1153                                                   | pde2                                                 | -0.02706 | 0.00504  | 0.04301  | 1 |
| SPV_1154                                                   | rpmE2                                                | -1.47667 | -1.76652 | -0.27271 | 1 |
| SPV_1155                                                   | efeU                                                 | 0.15589  | -0.04609 | -0.18617 | 1 |
| SPV_1156                                                   | efeB                                                 | 0.00909  | 0.03436  | 0.04118  | 1 |
| SPV_1158                                                   | gdhA                                                 | -0.09204 | -0.05175 | 0.05141  | 1 |
| SPV_1159                                                   | unknown                                              | 0.08162  | 0.07708  | 0.01250  | 1 |
| SPV_1160                                                   | unknown                                              | 0.16331  | 0.02072  | -0.12772 | 1 |
| SPV_1162                                                   | unknown                                              | 0.07865  | 0.02323  | -0.04311 | 1 |
| SPV_1164                                                   | cdd-2                                                | 0.04130  | -0.03892 | -0.06746 | 1 |
| SPV_1165                                                   | unknown                                              | 0.24372  | -0.07283 | -0.30504 | 1 |
| SPV_1166                                                   | unknown                                              | -0.02716 | 0.13823  | 0.17900  | 1 |
| SPV_1167                                                   | appD                                                 | 0.24911  | 0.02944  | -0.20343 | 1 |
| SPV_1168                                                   | appC                                                 | -0.14408 | 0.08323  | 0.23997  | 1 |
| SPV_1169                                                   | appB                                                 | -0.07936 | 0.15745  | 0.25381  | 1 |
| SPV_1173, SPV_1170, SPV_1171, SPV_1172                     | unknown, appA, unknown, nanE-2                       | 0.08894  | 0.02863  | -0.04981 | 1 |
| SPV_1174                                                   | unknown                                              | -0.03638 | -0.04537 | 0.00402  | 1 |
| SPV_1175                                                   | unknown                                              | 0.18646  | 0.06229  | -0.11113 | 1 |
| SPV_1176                                                   | unknown                                              | 0.04743  | 0.02737  | -0.00828 | 1 |
| SPV_1177                                                   | unknown                                              | 0.09717  | -0.01863 | -0.10034 | 1 |
| SPV_1178                                                   | ptrB                                                 | 0.35731  | 0.28212  | -0.06314 | 1 |
| SPV_1179                                                   | lanL                                                 | -0.20625 | 0.05198  | 0.27543  | 1 |
| SPV_1182, SPV_2329, SPV_2327, SPV_1185, SPV_1180, SPV_2328 | unknown, unknown, unknown, unknown, unknown, unknown | -0.05680 | 0.04307  | 0.11136  | 1 |
| SPV_1186                                                   | unknown                                              | -0.14756 | 0.11546  | 0.27633  | 1 |
| SPV_1187                                                   | rplL                                                 | -0.27882 | -0.23876 | 0.05344  | 1 |
| SPV_1188                                                   | rplJ                                                 | -2.24878 | -0.95140 | 1.30618  | 1 |
| SPV_1189                                                   | unknown                                              | -0.01874 | 0.07196  | 0.10887  | 1 |
| SPV_1190                                                   | trzA                                                 | 0.00939  | 0.25333  | 0.26049  | 1 |
| SPV_1191                                                   | unknown                                              | 0.01522  | -0.08167 | -0.08855 | 1 |
| SPV_1192                                                   | unknown                                              | -0.04857 | -0.00845 | 0.05644  | 1 |
| SPV_1193                                                   | msrAB1                                               | 0.04859  | -0.02208 | -0.05355 | 1 |
| SPV_1195, SPV_1193, SPV_2331, SPV_1194                     | hom, msrAB1, unknown, thrB                           | -0.11477 | 0.32095  | 0.45490  | 1 |
| SPV_1196                                                   | mecA                                                 | 0.08006  | -0.21105 | -0.27510 | 1 |
| SPV_1205, SPV_1203, SPV_1204, SPV_1202                     | aroA, pheA, aroK, psr                                | -0.01993 | 0.16946  | 0.20312  | 1 |
| SPV_1206                                                   | unknown                                              | 0.08674  | 0.07088  | -0.00264 | 1 |
| SPV_1207                                                   | tyrA                                                 | -0.04179 | 0.14803  | 0.20481  | 1 |
| SPV_1208                                                   | aroC                                                 | -0.05049 | 0.16731  | 0.23327  | 1 |
| SPV_1209                                                   | aroB                                                 | -0.01868 | 0.07252  | 0.10295  | 1 |
| SPV_1210                                                   | aroE                                                 | -0.08134 | -0.01643 | 0.07539  | 1 |

|                                                  |                              |          |          |          |   |
|--------------------------------------------------|------------------------------|----------|----------|----------|---|
| SPV_1211                                         | aroD                         | 0.03655  | -0.25300 | -0.27511 | 1 |
| SPV_1212                                         | ywbD                         | -0.06585 | -0.21660 | -0.13605 | 1 |
| SPV_1213, SPV_1214                               | unknown, unknown             | 0.10718  | 0.11784  | 0.02013  | 1 |
| SPV_1215                                         | amy                          | 0.05334  | 0.12217  | 0.07858  | 1 |
| SPV_1218, SPV_1220, SPV_1219, SPV_1221, SPV_1222 | potD, potB, potC, potA, murB | -5.68637 | -5.30092 | 0.39547  | 1 |
| SPV_1223                                         | unknown                      | -0.15848 | 0.06175  | 0.23217  | 1 |
| SPV_1224                                         | budA                         | -0.07279 | 0.05959  | 0.14598  | 1 |
| SPV_1225                                         | unknown                      | 0.06697  | 0.06965  | 0.01888  | 1 |
| SPV_1226                                         | unknown                      | 0.31620  | 0.07960  | -0.21731 | 1 |
| SPV_1227                                         | phoU2                        | 0.11136  | 0.02315  | -0.07210 | 1 |
| SPV_1228                                         | pstB2-2                      | 0.03573  | 0.04361  | 0.02340  | 1 |
| SPV_1229                                         | pstB2-1                      | 0.14882  | -0.09315 | -0.22691 | 1 |
| SPV_1230                                         | pstA2                        | -0.07326 | -0.06169 | 0.02767  | 1 |
| SPV_1231                                         | pstC2                        | 0.05631  | 0.04398  | 0.00380  | 1 |
| SPV_1232                                         | pstS2                        | -0.01547 | -0.12010 | -0.09169 | 1 |
| SPV_1233                                         | unknown                      | 0.11380  | 0.04815  | -0.04972 | 1 |
| SPV_1234, SPV_1235, SPV_1236                     | unknown, unknown, spxA1      | 0.03414  | 0.21353  | 0.19207  | 1 |
| SPV_1237                                         | unknown                      | -0.03510 | 0.02860  | 0.07655  | 1 |
| SPV_1238, SPV_1240, SPV_1239                     | nagD, hemN, unknown          | 0.03673  | 0.11306  | 0.09019  | 1 |
| SPV_1241                                         | unknown                      | 0.06138  | 0.11584  | 0.06113  | 1 |
| SPV_1242                                         | unknown                      | -0.04414 | 0.12060  | 0.17579  | 1 |
| SPV_1244, SPV_1243                               | hprK, lgt                    | -0.06158 | 0.17358  | 0.24987  | 1 |
| SPV_1245                                         | rpsU                         | -1.42669 | -2.13911 | -0.69625 | 1 |
| SPV_1246                                         | nagB                         | 0.21057  | -0.08185 | -0.27691 | 1 |
| SPV_1247                                         | queA                         | -0.08749 | -0.00110 | 0.10223  | 1 |
| SPV_1248                                         | cbpM                         | -0.06171 | -0.00362 | 0.07562  | 1 |
| SPV_1249, SPV_1250, SPV_1251                     | unknown, nadE, pncB          | -0.42029 | -0.46179 | -0.03247 | 1 |
| SPV_1252                                         | unknown                      | 0.19564  | -0.01587 | -0.19883 | 1 |
| SPV_1253                                         | unknown                      | 0.14074  | -0.11183 | -0.24014 | 1 |
| SPV_1254                                         | unknown                      | -0.19083 | 0.01693  | 0.22046  | 1 |
| SPV_1255                                         | unknown                      | -0.00143 | -0.00498 | 0.01137  | 1 |
| SPV_1256                                         | unknown                      | 0.22316  | -0.01514 | -0.22285 | 1 |
| SPV_1257                                         | unknown                      | 0.03753  | 0.05513  | 0.03241  | 1 |
| SPV_1258                                         | unknown                      | 0.09181  | -0.10360 | -0.18048 | 1 |
| SPV_1260, SPV_1259                               | unknown, unknown             | 0.07582  | 0.07364  | 0.00854  | 1 |
| SPV_1261                                         | unknown                      | 0.16448  | 0.02630  | -0.12106 | 1 |
| SPV_1262                                         | unknown                      | 0.20332  | 0.08781  | -0.10065 | 1 |
| SPV_1263                                         | unknown                      | -0.09013 | 0.07647  | 0.18104  | 1 |
| SPV_1264                                         | unknown                      | -0.02627 | 0.06006  | 0.09847  | 1 |
| SPV_1265                                         | unknown                      | 0.10748  | -0.03630 | -0.12878 | 1 |
| SPV_1266                                         | unknown                      | 0.23649  | 0.02150  | -0.20050 | 1 |
| SPV_1267                                         | unknown                      | 0.02500  | 0.00801  | -0.00153 | 1 |
| SPV_1272                                         | unknown                      | 0.12307  | 0.01242  | -0.09819 | 1 |
| SPV_1273                                         | unknown                      | 0.04185  | 0.07474  | 0.05391  | 1 |
| SPV_1274                                         | guaA                         | 0.05672  | 0.42498  | 0.38213  | 1 |
| SPV_1275                                         | nagR                         | 0.16017  | 0.09438  | -0.04573 | 1 |
| SPV_1276                                         | unknown                      | 0.12533  | 0.11004  | -0.00023 | 1 |
| SPV_1277                                         | unknown                      | -0.12786 | 0.07656  | 0.21702  | 1 |
| SPV_1278                                         | cppA                         | 0.07891  | 0.14006  | 0.08207  | 1 |
| SPV_1279                                         | unknown                      | 0.05857  | -0.02341 | -0.06971 | 1 |
| SPV_1280, SPV_2338                               | unknown, capA                | 0.24172  | -0.04035 | -0.26546 | 1 |
| SPV_1284                                         | unknown                      | 0.03256  | 0.21149  | 0.19336  | 1 |
| SPV_1285                                         | def1                         | 0.08338  | -0.39324 | -0.45970 | 1 |
| SPV_1286                                         | trmH                         | 0.18987  | -0.11357 | -0.28944 | 1 |
| SPV_1287                                         | trxB                         | -0.69027 | -0.05107 | 0.66404  | 1 |
| SPV_1288                                         | unknown                      | -0.05635 | 0.86069  | 0.93424  | 1 |
| SPV_1290, SPV_1289                               | unknown, unknown             | 0.03481  | -0.24035 | -0.26069 | 1 |
| SPV_1292, SPV_1293, SPV_1291                     | ogt, unknown, unknown        | 0.05326  | -0.03432 | -0.07342 | 1 |
| SPV_1294, SPV_1295                               | unknown, unknown             | 0.06886  | 0.11155  | 0.05439  | 1 |
| SPV_1296                                         | pdxT                         | -0.12667 | 0.06532  | 0.20491  | 1 |
| SPV_1297                                         | pdxS                         | 0.03101  | 0.05532  | 0.03733  | 1 |
| SPV_1298                                         | nox                          | 0.23126  | 0.22454  | 0.00841  | 1 |
| SPV_1299                                         | unknown                      | -0.13216 | 0.04735  | 0.19305  | 1 |
| SPV_1302, SPV_1301, SPV_1300                     | unknown, unknown, apbE       | 0.02837  | 0.08222  | 0.07703  | 1 |
| SPV_1308                                         | unknown                      | 0.15336  | 0.02106  | -0.11561 | 1 |
| SPV_1309, SPV_1308                               | pgdA, unknown                | -0.04197 | -0.27668 | -0.22487 | 1 |
| SPV_1311                                         | mocA                         | 0.13756  | -0.09693 | -0.20565 | 1 |

|                                                                                |                                                |          |          |          |   |
|--------------------------------------------------------------------------------|------------------------------------------------|----------|----------|----------|---|
| SPV_1312                                                                       | yfmL                                           | -0.01440 | -0.04148 | -0.01382 | 1 |
| SPV_1315                                                                       | unknown                                        | 0.03956  | -0.06923 | -0.09280 | 1 |
| SPV_1317                                                                       | unknown                                        | 0.10560  | 0.10564  | 0.00985  | 1 |
| SPV_1318                                                                       | tuf                                            | -3.54041 | -2.42416 | 1.12932  | 1 |
| SPV_1319                                                                       | unknown                                        | 0.04626  | 0.15060  | 0.11788  | 1 |
| SPV_1320                                                                       | unknown                                        | -0.34712 | 0.35454  | 0.71870  | 1 |
| SPV_1321                                                                       | mucB                                           | 0.16709  | -0.03749 | -0.18706 | 1 |
| SPV_1322                                                                       | unknown                                        | 0.15348  | -0.02037 | -0.15265 | 1 |
| SPV_1323                                                                       | unknown                                        | -0.04403 | 0.08284  | 0.14389  | 1 |
| SPV_1326                                                                       | pgm                                            | -0.05124 | 0.34877  | 0.41564  | 1 |
| SPV_1327                                                                       | bta                                            | 0.05005  | 0.97629  | 0.93913  | 1 |
| SPV_1329, SPV_1328, SPV_1330                                                   | glnQ6, glnH6, glnP6                            | 0.22919  | 0.14275  | -0.08009 | 1 |
| SPV_1331, SPV_1332                                                             | unknown, unknown                               | 0.20830  | 0.17280  | -0.02359 | 1 |
| SPV_1333                                                                       | unknown                                        | 0.01248  | 0.03797  | 0.04027  | 1 |
| SPV_1339, SPV_1340, SPV_1338, SPV_1336, SPV_1337, SPV_1341, SPV_1335, SPV_1334 | atpF, atpB, atpH, atpG, atpA, atpE, atpD, atpC | -1.57957 | -0.71995 | 0.88247  | 1 |
| SPV_1343                                                                       | unknown                                        | 0.30865  | 0.06531  | -0.23168 | 1 |
| SPV_1344                                                                       | unknown                                        | 0.10238  | 0.14104  | 0.05399  | 1 |
| SPV_1346, SPV_1345                                                             | mltG, greA                                     | -0.17890 | 0.19617  | 0.39218  | 1 |
| SPV_1347                                                                       | unknown                                        | -0.21008 | 0.44177  | 0.66818  | 1 |
| SPV_1348                                                                       | unknown                                        | -5.86888 | -4.74299 | 1.13605  | 1 |
| SPV_1349                                                                       | murC                                           | -5.81127 | -4.81010 | 1.02559  | 1 |
| SPV_1350                                                                       | unknown                                        | -6.20981 | -4.90787 | 1.31648  | 1 |
| SPV_1351                                                                       | snf                                            | 0.04105  | 0.75264  | 0.72693  | 1 |
| SPV_1353, SPV_1352                                                             | metB, patB2                                    | 0.35424  | 0.11163  | -0.23219 | 1 |
| SPV_1357                                                                       | aliB                                           | 0.11257  | -0.02245 | -0.12413 | 1 |
| SPV_1359                                                                       | murE                                           | -5.27234 | -4.21521 | 1.06303  | 1 |
| SPV_1360                                                                       | unknown                                        | 0.10387  | 0.00124  | -0.08849 | 1 |
| SPV_1361                                                                       | unknown                                        | 0.07071  | 0.04373  | -0.01580 | 1 |
| SPV_1362                                                                       | unknown                                        | 0.10166  | 0.09589  | 0.01462  | 1 |
| SPV_1363                                                                       | ppaC                                           | -1.23357 | -0.50538 | 0.74664  | 1 |
| SPV_1365, SPV_1364                                                             | unknown, unknown                               | 0.00657  | 0.15668  | 0.16202  | 1 |
| SPV_1367, SPV_1365, SPV_1366, SPV_1364                                         | unknown, unknown, unknown, unknown             | -0.12647 | 0.42472  | 0.56472  | 1 |
| SPV_1369, SPV_1368                                                             | ssbA, rpsR                                     | -3.19480 | -2.33523 | 0.87242  | 1 |
| SPV_1370                                                                       | rpsF                                           | -4.06394 | -3.19361 | 0.88513  | 1 |
| SPV_1371                                                                       | asnC                                           | -2.67622 | -1.56722 | 1.12111  | 1 |
| SPV_1372                                                                       | unknown                                        | -2.57125 | -1.33795 | 1.24925  | 1 |
| SPV_1375                                                                       | unknown                                        | 0.18326  | 0.07202  | -0.09397 | 1 |
| SPV_1376                                                                       | pclA                                           | 0.28112  | 0.10545  | -0.16366 | 1 |
| SPV_1377                                                                       | mga1                                           | 0.03768  | 0.01815  | -0.00341 | 1 |
| SPV_1378                                                                       | yaaA                                           | 0.09679  | 0.04226  | -0.03786 | 1 |
| SPV_1379                                                                       | unknown                                        | 0.17596  | -0.02418 | -0.19031 | 1 |
| SPV_1381, SPV_1380, SPV_1379                                                   | def2, unknown, unknown                         | 0.05681  | -0.02722 | -0.06835 | 1 |
| SPV_1383, SPV_1382                                                             | pacL, unknown                                  | 0.15654  | 0.13438  | -0.00841 | 1 |
| SPV_1384                                                                       | mntE                                           | -0.05591 | 0.05402  | 0.12433  | 1 |
| SPV_1385, SPV_1389, SPV_1388, SPV_1387, SPV_1386                               | unknown, unknown, unknown, dapB, cca           | -0.65494 | -0.42066 | 0.24846  | 1 |
| SPV_1390, SPV_1391, SPV_1392                                                   | glmM, unknown, disA                            | -1.40021 | -0.14217 | 1.27429  | 1 |
| SPV_1393                                                                       | unknown                                        | 0.24999  | -0.24924 | -0.48407 | 1 |
| SPV_1394, SPV_1396, SPV_1395                                                   | unknown, unknown, unknown                      | -0.00219 | -0.04752 | -0.03243 | 1 |
| SPV_1397                                                                       | aldR                                           | 0.02835  | -0.03113 | -0.04798 | 1 |
| SPV_1398                                                                       | engB                                           | -0.92944 | -0.72870 | 0.21467  | 1 |
| SPV_1399                                                                       | clpX                                           | -2.05698 | -1.05922 | 1.01270  | 1 |
| SPV_1400                                                                       | unknown                                        | -0.24991 | -0.24015 | 0.02370  | 1 |
| SPV_1401                                                                       | foiA                                           | -2.90783 | -1.66179 | 1.26498  | 1 |
| SPV_1402                                                                       | dpr                                            | -0.12751 | 0.05622  | 0.19714  | 1 |
| SPV_1404, SPV_1403                                                             | tpiA, lytC                                     | -1.41125 | -1.54058 | -0.11389 | 1 |
| SPV_1405, SPV_1406                                                             | dnaD, metA                                     | -2.65411 | -2.48517 | 0.18525  | 1 |
| SPV_1407                                                                       | apt                                            | -0.11899 | -0.03374 | 0.09883  | 1 |
| SPV_1408                                                                       | unknown                                        | 0.01529  | -0.04742 | -0.07052 | 1 |
| SPV_1409                                                                       | msmK                                           | 0.20040  | 0.05205  | -0.13467 | 1 |
| SPV_1410                                                                       | tRNA-Leu-1                                     | -0.16259 | -0.06272 | 0.11497  | 1 |
| SPV_1411, SPV_1412                                                             | unknown, codY                                  | 0.10929  | 0.15392  | 0.05661  | 1 |
| SPV_1413                                                                       | cshA                                           | -0.04024 | 0.18358  | 0.23584  | 1 |
| SPV_1414                                                                       | oxIT                                           | 0.02796  | -0.01895 | -0.03231 | 1 |
| SPV_1415                                                                       | merA                                           | 0.24797  | 0.10505  | -0.12832 | 1 |

|                              |                   |          |          |          |   |
|------------------------------|-------------------|----------|----------|----------|---|
| SPV_1419, SPV_1418           | unknown, pepQ     | 0.03730  | 0.07376  | 0.05096  | 1 |
| SPV_1420                     | unknown           | 0.17822  | 0.03346  | -0.12882 | 1 |
| SPV_1423, SPV_1424, SPV_1422 | pdxK, truA, pdxU2 | -1.57345 | -0.85433 | 0.73295  | 1 |
| SPV_1425                     | unknown           | 0.17788  | -0.02910 | -0.18830 | 1 |
| SPV_1426                     | unknown           | 0.05651  | 0.10213  | 0.05554  | 1 |
| SPV_1427                     | phnA              | -0.03755 | 0.19502  | 0.25096  | 1 |
| SPV_1429                     | unknown           | -1.06854 | 0.07300  | 1.15596  | 1 |
| SPV_1430                     | fer               | -0.51943 | 0.26558  | 0.79739  | 1 |
| SPV_1431, SPV_1432           | gtrB, galE-1      | 0.10454  | 0.32947  | 0.24927  | 1 |
| SPV_1433                     | unknown           | 0.15488  | -0.00495 | -0.14367 | 1 |
| SPV_1434                     | ybgI              | -0.24775 | -0.05458 | 0.20677  | 1 |
| SPV_1435                     | unknown           | -0.09900 | -0.00727 | 0.11280  | 1 |
| SPV_1436                     | ctpE              | 0.16866  | 0.30528  | 0.16132  | 1 |
| SPV_1437                     | plsC              | -0.79442 | 0.15508  | 0.96377  | 1 |
| SPV_1438                     | cadD              | -0.15453 | 0.11063  | 0.27781  | 1 |
| SPV_1439                     | rpsO              | 0.11596  | 0.02603  | -0.07381 | 1 |
| SPV_1440                     | unknown           | 0.02505  | -0.01702 | -0.02860 | 1 |
| SPV_1441                     | unknown           | 0.16382  | 0.08088  | -0.06990 | 1 |
| SPV_1446, SPV_1445           | unknown, unknown  | 0.08162  | 0.09016  | 0.02385  | 1 |
| SPV_1447                     | unknown           | 0.09861  | -0.04083 | -0.12444 | 1 |
| SPV_1448                     | unknown           | -0.06448 | -0.21178 | -0.13901 | 1 |
| SPV_1449                     | unknown           | 0.08647  | 0.05665  | -0.01343 | 1 |
| SPV_1451, SPV_1450           | unknown, mntR     | -0.18338 | -0.21601 | -0.01994 | 1 |
| SPV_1454                     | unknown           | -0.07003 | -0.02257 | 0.06676  | 1 |
| SPV_1457                     | dtd               | 0.43824  | -0.03017 | -0.45063 | 1 |
| SPV_1458                     | relA              | 0.23061  | 0.00356  | -0.21250 | 1 |
| SPV_1459                     | unknown           | 0.03920  | 0.06974  | 0.04795  | 1 |
| SPV_1460                     | pepO              | 0.34741  | 0.02775  | -0.30480 | 1 |
| SPV_1461, SPV_1463, SPV_1462 | psaB, psaA, psaC  | -0.47219 | -0.05661 | 0.43200  | 1 |
| SPV_1464                     | psaD              | -0.11108 | -0.05267 | 0.06906  | 1 |
| SPV_1465                     | unknown           | 0.15652  | 0.11919  | -0.01823 | 1 |
| SPV_1466                     | unknown           | 0.04279  | 0.02639  | 0.00148  | 1 |
| SPV_1467                     | unknown           | 0.01205  | 0.03956  | 0.04262  | 1 |
| SPV_1468                     | gpmA              | -1.41366 | -1.00117 | 0.42524  | 1 |
| SPV_1469                     | unknown           | -0.01810 | 0.26660  | 0.29642  | 1 |
| SPV_1474                     | divlVA            | -1.91873 | -1.13764 | 0.79280  | 1 |
| SPV_1478                     | ylmE              | -0.08039 | 0.27100  | 0.36686  | 1 |
| SPV_1480, SPV_1479           | ftsA, ftsZ        | -4.61327 | -3.29809 | 1.32948  | 1 |
| SPV_1481                     | unknown           | -0.05727 | 0.25225  | 0.32819  | 1 |
| SPV_1482                     | unknown           | -0.02435 | 0.50048  | 0.53748  | 1 |
| SPV_1483                     | murF              | -3.13062 | -1.85529 | 1.28902  | 1 |
| SPV_1485                     | recR              | 0.22931  | 0.40099  | 0.18351  | 1 |
| SPV_1486                     | pbp2b             | 0.19694  | -0.06353 | -0.24627 | 1 |
| SPV_1487                     | nanR              | -0.01473 | 0.18796  | 0.21870  | 1 |
| SPV_1488                     | nanK              | 0.03080  | 0.04296  | 0.02207  | 1 |
| SPV_1490                     | unknown           | -0.14024 | 0.08219  | 0.23097  | 1 |
| SPV_1491                     | unknown           | 0.08953  | 0.08682  | 0.01440  | 1 |
| SPV_1492                     | yjgK              | 0.18405  | 0.00395  | -0.16806 | 1 |
| SPV_1493                     | satC              | -0.09218 | 0.01928  | 0.13069  | 1 |
| SPV_1494                     | satB              | -0.16981 | 0.16990  | 0.35169  | 1 |
| SPV_1495                     | satA              | -0.08596 | -0.00776 | 0.09220  | 1 |
| SPV_1496                     | nanP              | 0.26171  | -0.07195 | -0.32761 | 1 |
| SPV_1497                     | nanE-1            | -0.03594 | 0.10117  | 0.14137  | 1 |
| SPV_1498                     | unknown           | -0.00665 | 0.07787  | 0.09871  | 1 |
| SPV_1499                     | nanB              | -0.05308 | 0.02421  | 0.09098  | 1 |
| SPV_1500                     | unknown           | -0.03637 | 0.03992  | 0.08877  | 1 |
| SPV_1501                     | ycjO              | 0.07849  | 0.01711  | -0.04379 | 1 |
| SPV_1502                     | unknown           | -0.13242 | 0.10295  | 0.24864  | 1 |
| SPV_1503                     | unknown           | 0.11064  | 0.07305  | -0.02417 | 1 |
| SPV_1504, SPV_1505           | nanA, unknown     | 0.07299  | 0.00729  | -0.05211 | 1 |
| SPV_1506                     | axe1              | -0.13160 | 0.11367  | 0.25782  | 1 |
| SPV_1507                     | recG              | 0.23999  | 0.13117  | -0.09415 | 1 |
| SPV_1508                     | alr               | -2.23272 | -1.22075 | 1.02248  | 1 |
| SPV_1509                     | acpS              | -1.86491 | -1.11027 | 0.76993  | 1 |
| SPV_1510                     | aroF              | -2.05898 | -1.07787 | 0.99649  | 1 |
| SPV_1511                     | aroG              | -1.32412 | -0.79108 | 0.55410  | 1 |
| SPV_1512                     | secA              | -1.64107 | -0.71292 | 0.94829  | 1 |
| SPV_1513                     | unknown           | -0.10504 | 0.08741  | 0.20633  | 1 |

|                                                                                |                                                             |          |          |          |   |
|--------------------------------------------------------------------------------|-------------------------------------------------------------|----------|----------|----------|---|
| SPV_1514                                                                       | unknown                                                     | 0.01663  | 0.18907  | 0.18656  | 1 |
| SPV_1515                                                                       | unknown                                                     | 0.22191  | 0.12134  | -0.08981 | 1 |
| SPV_1516                                                                       | unknown                                                     | 0.09478  | 0.05298  | -0.02659 | 1 |
| SPV_1517                                                                       | unknown                                                     | 0.24483  | 0.08027  | -0.15110 | 1 |
| SPV_1518                                                                       | unknown                                                     | -0.00420 | 0.15289  | 0.16879  | 1 |
| SPV_1519                                                                       | engA                                                        | -1.00854 | -0.48670 | 0.53584  | 1 |
| SPV_1520                                                                       | frp                                                         | -2.61686 | -1.51161 | 1.12046  | 1 |
| SPV_1521                                                                       | dnal                                                        | -3.49371 | -2.27645 | 1.23419  | 1 |
| SPV_1522, SPV_1523                                                             | dnaB, nrdR                                                  | -3.96051 | -2.66387 | 1.31036  | 1 |
| SPV_1526, SPV_1524, SPV_1525                                                   | unknown, gntR, unknown                                      | -0.05813 | 0.17235  | 0.24750  | 1 |
| SPV_1527, SPV_1528, SPV_2383                                                   | qsrB, qsrA, srf-22                                          | 0.11720  | -0.01915 | -0.12107 | 1 |
| SPV_1529                                                                       | unknown                                                     | 0.19379  | 0.06856  | -0.11013 | 1 |
| SPV_1530                                                                       | unknown                                                     | 0.05611  | 0.09936  | 0.05891  | 1 |
| SPV_1531                                                                       | scrK                                                        | -0.05063 | 0.19467  | 0.26185  | 1 |
| SPV_1532                                                                       | scrA                                                        | -0.19659 | 0.05732  | 0.26823  | 1 |
| SPV_1533                                                                       | unknown                                                     | -0.16756 | 0.01600  | 0.19585  | 1 |
| SPV_1534, SPV_1535                                                             | scrB, scrR                                                  | -1.23211 | -1.26130 | -0.01525 | 1 |
| SPV_1536, SPV_1537                                                             | mvaA, mvaS                                                  | -0.68605 | 0.59957  | 1.29841  | 1 |
| SPV_1538                                                                       | unknown                                                     | -0.06977 | 0.11364  | 0.20064  | 1 |
| SPV_1539                                                                       | unknown                                                     | 0.03448  | 0.15696  | 0.13550  | 1 |
| SPV_1540                                                                       | unknown                                                     | 0.29953  | 0.01832  | -0.26362 | 1 |
| SPV_1541                                                                       | unknown                                                     | 0.06984  | 0.08362  | 0.02735  | 1 |
| SPV_1543, SPV_1542                                                             | phpP, stkP                                                  | -0.26155 | -0.31611 | -0.04092 | 1 |
| SPV_1544                                                                       | sun                                                         | 0.08298  | -0.03493 | -0.10281 | 1 |
| SPV_1545                                                                       | fmt                                                         | -0.40672 | -0.12103 | 0.30215  | 1 |
| SPV_1546                                                                       | priA                                                        | -0.49589 | -0.55831 | -0.04978 | 1 |
| SPV_1549                                                                       | rmy                                                         | -0.23249 | -0.01121 | 0.23789  | 1 |
| SPV_1551, SPV_1550                                                             | yefM, yoeB                                                  | -0.05207 | -0.21539 | -0.14705 | 1 |
| SPV_1552                                                                       | unknown                                                     | -0.33494 | -0.22667 | 0.12414  | 1 |
| SPV_1553                                                                       | unknown                                                     | -0.10246 | -0.17647 | -0.05785 | 1 |
| SPV_1554                                                                       | rsfA                                                        | -0.36283 | 0.02377  | 0.40177  | 1 |
| SPV_1557, SPV_1556, SPV_1558, SPV_1559, SPV_1561, SPV_1555, SPV_1560           | nadD, yqeK, unknown, yqeH, corA2, unknown, unknown          | -2.84749 | -1.41461 | 1.44641  | 1 |
| SPV_1562, SPV_1557, SPV_1556, SPV_1558, SPV_1559, SPV_1561, SPV_1555, SPV_1560 | unknown, nadD, yqeK, unknown, yqeH, corA2, unknown, unknown | 0.05642  | -0.03475 | -0.07875 | 1 |
| SPV_1564                                                                       | unknown                                                     | -0.04293 | -0.03206 | 0.02287  | 1 |
| SPV_1565                                                                       | unknown                                                     | 0.00993  | 0.05201  | 0.05630  | 1 |
| SPV_1567, SPV_1566                                                             | trxA, unknown                                               | 0.21019  | 0.02986  | -0.16670 | 1 |
| SPV_1568                                                                       | queF                                                        | 0.15191  | 0.04178  | -0.09442 | 1 |
| SPV_1569                                                                       | aqzZ                                                        | 0.13376  | 0.07841  | -0.04136 | 1 |
| SPV_1570                                                                       | unknown                                                     | 0.07574  | 0.02225  | -0.04241 | 1 |
| SPV_1571                                                                       | pepF2                                                       | 0.23339  | -0.00812 | -0.22903 | 1 |
| SPV_1572                                                                       | unknown                                                     | 0.12174  | -0.00606 | -0.11326 | 1 |
| SPV_1573                                                                       | prmA                                                        | 0.13792  | 0.00575  | -0.11676 | 1 |
| SPV_1574                                                                       | unknown                                                     | 0.11519  | 0.08408  | -0.01298 | 1 |
| SPV_1575                                                                       | unknown                                                     | -0.08912 | 0.11037  | 0.21340  | 1 |
| SPV_1576                                                                       | unknown                                                     | 0.14144  | 0.02214  | -0.10513 | 1 |
| SPV_1577                                                                       | hicB                                                        | 0.13606  | 0.00571  | -0.10793 | 1 |
| SPV_1578, SPV_1579                                                             | unknown, unknown                                            | 0.00663  | 0.12804  | 0.13116  | 1 |
| SPV_1580, SPV_2392, SPV_1581                                                   | unknown, ssrS, tRNA-Lys-1                                   | -0.02579 | 0.01918  | 0.05919  | 1 |
| SPV_1583, SPV_1582, SPV_1585, SPV_1584                                         | unknown, sacA, unknown, unknown                             | 0.11072  | 0.03775  | -0.05959 | 1 |
| SPV_1586                                                                       | unknown                                                     | 0.02659  | 0.00373  | -0.00870 | 1 |
| SPV_1587                                                                       | mga2                                                        | -0.10020 | 0.04998  | 0.17028  | 1 |
| SPV_1590, SPV_2393, SPV_1591, SPV_1589, SPV_1588                               | gls24, unknown, unknown, unknown, unknown                   | 0.14039  | -0.04741 | -0.16928 | 1 |
| SPV_1592                                                                       | unknown                                                     | 0.22115  | 0.01434  | -0.19564 | 1 |
| SPV_1593                                                                       | cclA                                                        | 0.17651  | 0.03749  | -0.12022 | 1 |
| SPV_1595, SPV_1594                                                             | unknown, unknown                                            | -2.00901 | -1.34155 | 0.68094  | 1 |
| SPV_1597, SPV_1598, SPV_1600, SPV_1596, SPV_1602, SPV_1599, SPV_1601           | trpB, trpF, trpD, trpA, trpE, trpC, trpG                    | 0.06682  | 0.09571  | 0.04421  | 1 |
| SPV_1603                                                                       | unknown                                                     | 0.21685  | 0.06296  | -0.13466 | 1 |
| SPV_1605                                                                       | unknown                                                     | 0.19317  | -0.10771 | -0.28375 | 1 |
| SPV_1609, SPV_1610, SPV_1608, SPV_1606, SPV_1607                               | unknown, unknown, unknown, mgtC, sfuB                       | -0.06105 | 0.07768  | 0.14997  | 1 |

|                                                                                                    |                                                                             |          |          |          |   |
|----------------------------------------------------------------------------------------------------|-----------------------------------------------------------------------------|----------|----------|----------|---|
| SPV_1609, SPV_1617, SPV_2396, SPV_1613, SPV_1610, SPV_1608, SPV_1606, SPV_1614, SPV_1612, SPV_1607 | unknown, pfbA, unknown, galT-1, unknown, unknown, mgtC, phoU3, galE-2, sfuB | 0.11932  | 0.06883  | -0.03844 | 1 |
| SPV_1618                                                                                           | unknown                                                                     | 0.01059  | 0.02593  | 0.02988  | 1 |
| SPV_1620, SPV_1619                                                                                 | unknown, aatB                                                               | -0.77017 | 0.13846  | 0.92650  | 1 |
| SPV_1621                                                                                           | unknown                                                                     | 0.11563  | -0.00301 | -0.10686 | 1 |
| SPV_1622                                                                                           | unknown                                                                     | -0.01318 | 0.15691  | 0.18073  | 1 |
| SPV_1626                                                                                           | exoA                                                                        | 0.30553  | -0.06331 | -0.35498 | 1 |
| SPV_1627                                                                                           | unknown                                                                     | -0.01731 | 0.02431  | 0.05810  | 1 |
| SPV_1630, SPV_1631                                                                                 | dprD, dprC                                                                  | 0.20555  | 0.11772  | -0.08012 | 1 |
| SPV_1632                                                                                           | paal                                                                        | -0.06410 | 0.09552  | 0.17041  | 1 |
| SPV_1633                                                                                           | galT-2                                                                      | -0.04071 | 0.01977  | 0.08146  | 1 |
| SPV_1634                                                                                           | galK                                                                        | 0.34345  | 0.02230  | -0.31200 | 1 |
| SPV_1635                                                                                           | galR                                                                        | 0.10808  | 0.03415  | -0.06066 | 1 |
| SPV_1637, SPV_1636                                                                                 | nmlR, adhB                                                                  | -0.12773 | -0.04697 | 0.09930  | 1 |
| SPV_1637, SPV_1636, SPV_1638                                                                       | nmlR, adhB, czcD                                                            | 0.20301  | 0.00860  | -0.18232 | 1 |
| SPV_1640                                                                                           | pnuC                                                                        | 0.31537  | -0.00694 | -0.30556 | 1 |
| SPV_1643, SPV_1644, SPV_1645, SPV_1642                                                             | proV, unknown, unknown, proWX                                               | -0.09277 | 0.08803  | 0.19433  | 1 |
| SPV_1647, SPV_1646                                                                                 | pepA, unknown                                                               | 0.20638  | 0.09710  | -0.09078 | 1 |
| SPV_1648                                                                                           | unknown                                                                     | 0.18532  | -0.07528 | -0.24791 | 1 |
| SPV_1649, SPV_1652, SPV_1650, SPV_1651                                                             | piuB, piuA, piuC, piuD                                                      | 0.15854  | 0.03476  | -0.11028 | 1 |
| SPV_1653                                                                                           | yidD                                                                        | 0.20713  | 0.17942  | -0.01114 | 1 |
| SPV_1654                                                                                           | rluB                                                                        | 0.00288  | -0.00131 | 0.00620  | 1 |
| SPV_1655                                                                                           | scpB                                                                        | -0.09915 | -0.24795 | -0.13483 | 1 |
| SPV_1656                                                                                           | scpA                                                                        | -0.21367 | -0.21968 | 0.00645  | 1 |
| SPV_1657                                                                                           | xerD                                                                        | -0.00904 | -0.15759 | -0.13577 | 1 |
| SPV_1658, SPV_1659, SPV_1661, SPV_1660                                                             | unknown, unknown, murl, rdgB                                                | -0.64250 | 0.38391  | 1.04175  | 1 |
| SPV_1662                                                                                           | unknown                                                                     | -0.22710 | 0.53106  | 0.77189  | 1 |
| SPV_1663                                                                                           | treC                                                                        | 0.38204  | -0.02501 | -0.39001 | 1 |
| SPV_1664                                                                                           | treP                                                                        | -0.06361 | 0.05610  | 0.13281  | 1 |
| SPV_1665                                                                                           | treR                                                                        | 0.06335  | 0.02514  | -0.02857 | 1 |
| SPV_1667                                                                                           | amiF                                                                        | -0.85752 | -1.05611 | -0.18371 | 1 |
| SPV_1668                                                                                           | amiE                                                                        | -1.09217 | -1.09768 | 0.00565  | 1 |
| SPV_1669                                                                                           | amiD                                                                        | -0.91112 | -1.09690 | -0.17182 | 1 |
| SPV_1670                                                                                           | amiC                                                                        | -1.23488 | -0.96944 | 0.28015  | 1 |
| SPV_1671                                                                                           | amiA                                                                        | -1.36007 | -0.80871 | 0.56764  | 1 |
| SPV_1672                                                                                           | tacl                                                                        | -0.09694 | 0.87849  | 0.98954  | 1 |
| SPV_1673                                                                                           | gtfA                                                                        | 0.05089  | 0.03364  | -0.00905 | 1 |
| SPV_1674                                                                                           | unknown                                                                     | -0.44694 | -0.51302 | -0.05122 | 1 |
| SPV_1675                                                                                           | msmG                                                                        | 0.03057  | 0.12528  | 0.11302  | 1 |
| SPV_1676                                                                                           | msmF                                                                        | -0.06987 | 0.02830  | 0.11095  | 1 |
| SPV_1677                                                                                           | msmE                                                                        | 0.09614  | 0.08701  | 0.00729  | 1 |
| SPV_1678                                                                                           | agaN                                                                        | 0.19508  | -0.11286 | -0.30578 | 1 |
| SPV_1679, SPV_1680                                                                                 | msmR, birA                                                                  | 0.00540  | 0.11412  | 0.12547  | 1 |
| SPV_1682                                                                                           | tRNA-Ser-2                                                                  | -2.88957 | -1.81952 | 1.08184  | 1 |
| SPV_1683, SPV_1682                                                                                 | tRNA-Ile-1, tRNA-Ser-2                                                      | -3.65502 | -2.31561 | 1.33232  | 1 |
| SPV_1697                                                                                           | tRNA-Asp-1                                                                  | -3.77733 | -2.59266 | 1.19531  | 1 |
| SPV_1698                                                                                           | tRNA-Val-1                                                                  | -0.26343 | -0.06871 | 0.20850  | 1 |
| SPV_1703                                                                                           | tRNA-Glu-2                                                                  | -3.98688 | -3.18217 | 0.82476  | 1 |
| SPV_1704                                                                                           | rumA-2                                                                      | 0.19074  | 0.04833  | -0.13230 | 1 |
| SPV_1705                                                                                           | recX                                                                        | 0.12514  | -0.00793 | -0.11835 | 1 |
| SPV_1706                                                                                           | unknown                                                                     | -0.30752 | 0.54835  | 0.86848  | 1 |
| SPV_1707                                                                                           | unknown                                                                     | 0.07675  | 0.12114  | 0.05682  | 1 |
| SPV_1708                                                                                           | unknown                                                                     | 0.19137  | 0.02426  | -0.15499 | 1 |
| SPV_1710, SPV_1709                                                                                 | groES, groEL                                                                | -0.02384 | -0.07090 | -0.03123 | 1 |
| SPV_1711                                                                                           | ssbB                                                                        | 0.03960  | 0.08832  | 0.06369  | 1 |
| SPV_1712                                                                                           | ydfG                                                                        | 0.10560  | 0.03390  | -0.05920 | 1 |
| SPV_1713                                                                                           | unknown                                                                     | -0.01243 | -0.12665 | -0.09937 | 1 |
| SPV_1714                                                                                           | unknown                                                                     | 0.02586  | 0.08243  | 0.07333  | 1 |
| SPV_1715                                                                                           | unknown                                                                     | 0.15036  | 0.13969  | 0.00732  | 1 |
| SPV_1717, SPV_1718, SPV_1716                                                                       | unknown, unknown, unknown                                                   | -0.25011 | 0.02585  | 0.28237  | 1 |
| SPV_1719, SPV_1720                                                                                 | unknown, unknown                                                            | 0.20280  | 0.04231  | -0.14629 | 1 |
| SPV_1725                                                                                           | yeeN                                                                        | 0.00665  | -0.01945 | -0.01150 | 1 |

|                                                                                                              |                                                                                      |          |          |          |   |
|--------------------------------------------------------------------------------------------------------------|--------------------------------------------------------------------------------------|----------|----------|----------|---|
| SPV_1727, SPV_1729, SPV_1726, SPV_1728                                                                       | unknown, unknown, ply, unknown                                                       | 0.22536  | -0.04671 | -0.25555 | 1 |
| SPV_1731                                                                                                     | unknown                                                                              | -0.01344 | 0.10427  | 0.13361  | 1 |
| SPV_1732                                                                                                     | unknown                                                                              | -0.11214 | 0.08988  | 0.20881  | 1 |
| SPV_1736                                                                                                     | unknown                                                                              | 0.16802  | 0.07829  | -0.07835 | 1 |
| SPV_1737                                                                                                     | lytA                                                                                 | -0.49306 | -0.08943 | 0.41541  | 1 |
| SPV_1738, SPV_1737                                                                                           | dinF, lytA                                                                           | -0.06639 | -0.02842 | 0.05399  | 1 |
| SPV_1738, SPV_1739, SPV_1737                                                                                 | dinF, recA, lytA                                                                     | -0.10528 | 0.06713  | 0.18309  | 1 |
| SPV_1738, SPV_1739, SPV_1740, SPV_1737                                                                       | dinF, recA, cinA, lytA                                                               | 0.02803  | 0.22430  | 0.21143  | 1 |
| SPV_1743, SPV_1741, SPV_1742                                                                                 | tsaE, lytR, unknown                                                                  | -1.09279 | 0.08011  | 1.19142  | 1 |
| SPV_1743, SPV_1744, SPV_1741, SPV_1742                                                                       | tsaE, comM, lytR, unknown                                                            | -0.12000 | 0.08311  | 0.21712  | 1 |
| SPV_1745                                                                                                     | plcR                                                                                 | 0.07332  | -0.04799 | -0.10865 | 1 |
| SPV_1751, SPV_1755, SPV_1752, SPV_1754, SPV_1750, SPV_1746, SPV_1747, SPV_1748, SPV_2420, SPV_1749, SPV_1753 | unknown, unknown, clyB, unknown, wrbA, unknown, pneA1, pneA2, unknown, lanM, unknown | 0.06690  | 0.16544  | 0.11051  | 1 |
| SPV_1757                                                                                                     | ndk                                                                                  | 0.39899  | -0.15395 | -0.53445 | 1 |
| SPV_1758                                                                                                     | rpoC                                                                                 | -2.31099 | -1.24669 | 1.08437  | 1 |
| SPV_1759                                                                                                     | rpoB                                                                                 | -2.51445 | -1.51141 | 1.01711  | 1 |
| SPV_1760                                                                                                     | tRNA-Cys-1                                                                           | -2.56083 | -1.89031 | 0.68324  | 1 |
| SPV_1761                                                                                                     | hlyX                                                                                 | 0.14772  | -0.03527 | -0.16919 | 1 |
| SPV_1762                                                                                                     | enuA                                                                                 | -0.00306 | 0.11916  | 0.13854  | 1 |
| SPV_1763                                                                                                     | epuA                                                                                 | -0.01191 | 0.02727  | 0.05656  | 1 |
| SPV_1764                                                                                                     | murA-2                                                                               | -0.16190 | 0.01207  | 0.18617  | 1 |
| SPV_1765, SPV_1767, SPV_1766                                                                                 | unknown, unknown, coaD                                                               | -0.02780 | 0.04425  | 0.08616  | 1 |
| SPV_1768                                                                                                     | asnA                                                                                 | -0.00679 | 0.11253  | 0.13125  | 1 |
| SPV_1769                                                                                                     | unknown                                                                              | 0.03287  | 0.01902  | -0.00198 | 1 |
| SPV_1771                                                                                                     | yjfA                                                                                 | 0.15126  | 0.04748  | -0.08638 | 1 |
| SPV_1772                                                                                                     | acyP                                                                                 | 0.27947  | 0.02556  | -0.23792 | 1 |
| SPV_1773                                                                                                     | yidC1                                                                                | -0.31962 | 0.26233  | 0.59460  | 1 |
| SPV_1774                                                                                                     | pflA                                                                                 | -0.06351 | 0.16223  | 0.24248  | 1 |
| SPV_1775                                                                                                     | lysA                                                                                 | 0.35213  | 0.11104  | -0.21813 | 1 |
| SPV_1776                                                                                                     | purR                                                                                 | 0.02303  | -0.31366 | -0.32022 | 1 |
| SPV_1778, SPV_1777                                                                                           | rmuC, yhaM                                                                           | -0.05833 | 0.09759  | 0.16661  | 1 |
| SPV_1780, SPV_1782, SPV_1779, SPV_1781                                                                       | rpe, ksgA, unknown, rsgA                                                             | -0.81860 | -0.74097 | 0.09569  | 1 |
| SPV_1785, SPV_1784, SPV_1783                                                                                 | unknown, unknown, unknown                                                            | 0.12712  | 0.05284  | -0.05631 | 1 |
| SPV_1786                                                                                                     | unknown                                                                              | 0.16118  | 0.02985  | -0.11903 | 1 |
| SPV_1787, SPV_1788                                                                                           | rnmV, tatD                                                                           | 0.34881  | -0.09160 | -0.42817 | 1 |
| SPV_1789                                                                                                     | diiA                                                                                 | -0.06937 | 0.01463  | 0.09479  | 1 |
| SPV_1792                                                                                                     | unknown                                                                              | -0.02352 | 0.11217  | 0.15130  | 1 |
| SPV_1793                                                                                                     | unknown                                                                              | 0.11104  | -0.03841 | -0.13557 | 1 |
| SPV_1794                                                                                                     | unknown                                                                              | 0.18411  | 0.01476  | -0.15474 | 1 |
| SPV_1795                                                                                                     | unknown                                                                              | 0.21686  | 0.12106  | -0.08224 | 1 |
| SPV_1796                                                                                                     | unknown                                                                              | -0.15638 | 0.11207  | 0.28494  | 1 |
| SPV_1797                                                                                                     | ccpA                                                                                 | -0.44300 | -0.20594 | 0.25332  | 1 |
| SPV_1803, SPV_1800, SPV_1801, SPV_1799, SPV_1798, SPV_1802                                                   | unknown, unknown, unknown, unknown, unknown, unknown                                 | 0.06879  | 0.07365  | 0.01673  | 1 |
| SPV_1819                                                                                                     | nusG                                                                                 | -0.84842 | -0.63227 | 0.22836  | 1 |
| SPV_1820                                                                                                     | secE                                                                                 | -1.43889 | -0.92399 | 0.53570  | 1 |
| SPV_1821                                                                                                     | pbp2a                                                                                | -0.19654 | 0.20394  | 0.41615  | 1 |
| SPV_1822                                                                                                     | rluD2                                                                                | -0.07502 | 0.03714  | 0.12563  | 1 |
| SPV_1823                                                                                                     | gap                                                                                  | -2.02538 | -1.42464 | 0.61488  | 1 |
| SPV_1824                                                                                                     | unknown                                                                              | 0.19264  | 0.06111  | -0.11820 | 1 |
| SPV_1826                                                                                                     | nadC                                                                                 | -0.00967 | 0.09499  | 0.11892  | 1 |
| SPV_1827, SPV_2426                                                                                           | unknown, unknown                                                                     | 0.10011  | 0.00894  | -0.07762 | 1 |
| SPV_1829                                                                                                     | bguR                                                                                 | 0.08520  | -0.15675 | -0.23195 | 1 |
| SPV_1833, SPV_1831, SPV_1830, SPV_1832                                                                       | bguC, bguD, bguA, bguB                                                               | 0.13651  | -0.03787 | -0.15473 | 1 |
| SPV_1834                                                                                                     | adhE                                                                                 | -0.07209 | 0.03014  | 0.11560  | 1 |
| SPV_1836                                                                                                     | unknown                                                                              | 0.23763  | 0.08582  | -0.13948 | 1 |
| SPV_1837                                                                                                     | unknown                                                                              | -0.03126 | 0.12860  | 0.17423  | 1 |
| SPV_1838                                                                                                     | yajC                                                                                 | 0.01986  | 0.11869  | 0.11297  | 1 |
| SPV_1839, SPV_1838                                                                                           | ulaH, yajC                                                                           | -0.19924 | -0.32279 | -0.10395 | 1 |
| SPV_1840, SPV_1841                                                                                           | ulaG, ulaR                                                                           | -0.09553 | -0.03907 | 0.07128  | 1 |
| SPV_1842                                                                                                     | ulaF                                                                                 | 0.05392  | -0.08281 | -0.12241 | 1 |



|                                                                                |                                                          |          |          |          |   |
|--------------------------------------------------------------------------------|----------------------------------------------------------|----------|----------|----------|---|
| SPV_1843                                                                       | ulaE                                                     | 0.21144  | 0.05267  | -0.14345 | 1 |
| SPV_1844                                                                       | ulaD                                                     | 0.03011  | 0.14005  | 0.12360  | 1 |
| SPV_1845                                                                       | ulaC                                                     | 0.09659  | 0.13743  | 0.05528  | 1 |
| SPV_1846                                                                       | ulaB                                                     | 0.07195  | 0.19451  | 0.13902  | 1 |
| SPV_1847                                                                       | ulaA                                                     | -0.10054 | 0.06623  | 0.17890  | 1 |
| SPV_1848                                                                       | unknown                                                  | 0.18407  | -0.01126 | -0.17931 | 1 |
| SPV_1849                                                                       | eloR                                                     | -0.18090 | -0.97982 | -0.78498 | 1 |
| SPV_1850                                                                       | yidC2                                                    | -0.17537 | -1.41747 | -1.22722 | 1 |
| SPV_1851                                                                       | rnpA                                                     | -2.28556 | -2.04554 | 0.24758  | 1 |
| SPV_1852                                                                       | unknown                                                  | 0.06354  | -0.10310 | -0.15121 | 1 |
| SPV_1853                                                                       | ackA                                                     | -0.00619 | -0.38267 | -0.36242 | 1 |
| SPV_1854                                                                       | unknown                                                  | -0.01385 | 0.04718  | 0.07559  | 1 |
| SPV_1863, SPV_1861, SPV_1858, SPV_1859, SPV_1862, SPV_2427, SPV_1857, SPV_1860 | comGA, comGC, comGF, comGE, comGB, unknown, comGG, comGD | 0.18628  | -0.06061 | -0.22957 | 1 |
| SPV_1864                                                                       | unknown                                                  | 0.27834  | 0.08984  | -0.17284 | 1 |
| SPV_1865                                                                       | adh                                                      | 0.18040  | 0.04572  | -0.12211 | 1 |
| SPV_1866                                                                       | nagA                                                     | 0.33979  | -0.00543 | -0.33314 | 1 |
| SPV_1867                                                                       | adr                                                      | 0.15246  | 0.03715  | -0.10182 | 1 |
| SPV_1868                                                                       | tgt                                                      | -0.08473 | 0.08395  | 0.18265  | 1 |
| SPV_1869                                                                       | unknown                                                  | -0.00782 | 0.12736  | 0.15093  | 1 |
| SPV_1870                                                                       | pcp2                                                     | 0.42982  | 0.13629  | -0.27504 | 1 |
| SPV_1871, SPV_1872, SPV_1870                                                   | unknown, unknown, pcp2                                   | 0.09896  | 0.07024  | -0.01619 | 1 |
| SPV_1873                                                                       | unknown                                                  | -0.07774 | 0.09761  | 0.18670  | 1 |
| SPV_1874                                                                       | unknown                                                  | 0.11682  | 0.07470  | -0.02124 | 1 |
| SPV_1875                                                                       | unknown                                                  | 0.54895  | -0.04259 | -0.56735 | 1 |
| SPV_1876                                                                       | unknown                                                  | -0.01209 | 0.08763  | 0.11349  | 1 |
| SPV_1877                                                                       | thrC                                                     | 0.19001  | 0.11344  | -0.06866 | 1 |
| SPV_1878                                                                       | unknown                                                  | 0.22810  | 0.01582  | -0.19577 | 1 |
| SPV_1879                                                                       | tRNA-Leu-6                                               | -1.16677 | -0.88556 | 0.29513  | 1 |
| SPV_1880, SPV_1879, SPV_1881                                                   | tRNA-Gln-2, tRNA-Leu-6, tRNA-His-1                       | -3.05386 | -2.42215 | 0.64505  | 1 |
| SPV_1882                                                                       | tRNA-Trp-1                                               | -0.79864 | -0.05824 | 0.75679  | 1 |
| SPV_1883                                                                       | tRNA-Tyr-2                                               | -2.36869 | -1.36762 | 1.02232  | 1 |
| SPV_1884                                                                       | tRNA-Phe-2                                               | -0.06443 | 0.00720  | 0.08984  | 1 |
| SPV_1888                                                                       | tRNA-Gly-4                                               | -3.79064 | -2.51530 | 1.28671  | 1 |
| SPV_1895                                                                       | unknown                                                  | -2.18938 | -1.21116 | 0.99767  | 1 |
| SPV_1896                                                                       | gltX                                                     | -2.78445 | -1.70051 | 1.10559  | 1 |
| SPV_1897                                                                       | pgi                                                      | -2.57631 | -1.81740 | 0.77793  | 1 |
| SPV_1899, SPV_1898                                                             | unknown, unknown                                         | -0.15607 | 0.07780  | 0.24739  | 1 |
| SPV_1900                                                                       | patB                                                     | 0.10935  | -0.00122 | -0.09155 | 1 |
| SPV_1903                                                                       | hexA                                                     | 0.13500  | 0.06333  | -0.05446 | 1 |
| SPV_1904                                                                       | argR1                                                    | -2.27630 | -0.97125 | 1.31356  | 1 |
| SPV_1905                                                                       | argS                                                     | -0.44012 | -0.17346 | 0.27896  | 1 |
| SPV_1906                                                                       | unknown                                                  | -0.02029 | 0.03731  | 0.07251  | 1 |
| SPV_1907                                                                       | unknown                                                  | 0.07698  | -0.09798 | -0.15779 | 1 |
| SPV_1909, SPV_1908                                                             | pnpS, pnpR                                               | 0.07510  | 0.02450  | -0.03729 | 1 |
| SPV_1910                                                                       | pstS1                                                    | 0.04403  | 0.03169  | 0.00295  | 1 |
| SPV_1911                                                                       | pstC1                                                    | 0.06178  | 0.17932  | 0.13188  | 1 |
| SPV_1912                                                                       | pstA1                                                    | -0.00188 | -0.04323 | -0.02850 | 1 |
| SPV_1913                                                                       | pstB1                                                    | 0.18310  | 0.10021  | -0.06379 | 1 |
| SPV_1914                                                                       | phoU1                                                    | 0.29148  | 0.02389  | -0.25488 | 1 |
| SPV_1915                                                                       | unknown                                                  | 0.29384  | 0.10065  | -0.17492 | 1 |
| SPV_1916                                                                       | unknown                                                  | -0.06059 | -0.09402 | -0.02241 | 1 |
| SPV_1917                                                                       | unknown                                                  | -0.43470 | -0.23017 | 0.21909  | 1 |
| SPV_1918, SPV_1919                                                             | gpsA, galU                                               | -0.19177 | -0.33598 | -0.13013 | 1 |
| SPV_1920                                                                       | unknown                                                  | -0.01720 | 0.09460  | 0.13008  | 1 |
| SPV_1921                                                                       | unknown                                                  | 0.03358  | 0.04750  | 0.02785  | 1 |
| SPV_1922                                                                       | hipO                                                     | -1.11030 | -0.45389 | 0.66732  | 1 |
| SPV_1923                                                                       | dapD                                                     | -0.02738 | 0.10776  | 0.15700  | 1 |
| SPV_1924                                                                       | unknown                                                  | 0.06118  | 0.12306  | 0.07639  | 1 |
| SPV_1925                                                                       | pbp1b                                                    | 0.07473  | -0.16377 | -0.22379 | 1 |
| SPV_1926                                                                       | tyrS                                                     | 0.06535  | 0.03195  | -0.02161 | 1 |
| SPV_1927, SPV_1928                                                             | ctpC, unknown                                            | 0.06638  | 0.09200  | 0.03996  | 1 |
| SPV_1929                                                                       | rrmA                                                     | -0.08995 | -0.01404 | 0.08459  | 1 |
| SPV_1930                                                                       | unknown                                                  | 0.16706  | 0.05003  | -0.10210 | 1 |
| SPV_1931                                                                       | unknown                                                  | 0.11993  | 0.10027  | -0.00354 | 1 |
| SPV_1933, SPV_1932                                                             | malQ, malP                                               | 0.06394  | -0.00866 | -0.05970 | 1 |

|                                                                                                              |                                                                              |          |          |          |   |
|--------------------------------------------------------------------------------------------------------------|------------------------------------------------------------------------------|----------|----------|----------|---|
| SPV_1934                                                                                                     | malX                                                                         | -0.02696 | 0.03099  | 0.07843  | 1 |
| SPV_1935                                                                                                     | malC                                                                         | 0.09473  | 0.02644  | -0.06170 | 1 |
| SPV_1936                                                                                                     | malD                                                                         | 0.04886  | -0.02008 | -0.05333 | 1 |
| SPV_1938, SPV_1937                                                                                           | malR, malA                                                                   | -0.18344 | -0.01212 | 0.18659  | 1 |
| SPV_1943                                                                                                     | unknown                                                                      | -0.02037 | 0.01458  | 0.04774  | 1 |
| SPV_1944                                                                                                     | unknown                                                                      | 0.13131  | -0.03996 | -0.15675 | 1 |
| SPV_1945                                                                                                     | unknown                                                                      | 0.13765  | -0.02411 | -0.13743 | 1 |
| SPV_1946                                                                                                     | unknown                                                                      | 0.10131  | 0.04233  | -0.03642 | 1 |
| SPV_1947                                                                                                     | unknown                                                                      | -0.19281 | 0.14625  | 0.35084  | 1 |
| SPV_1948                                                                                                     | unknown                                                                      | -0.18895 | 0.04429  | 0.24557  | 1 |
| SPV_1950                                                                                                     | hisS                                                                         | -2.07638 | -1.24266 | 0.84664  | 1 |
| SPV_1951                                                                                                     | unknown                                                                      | 0.07791  | 0.06614  | 0.00325  | 1 |
| SPV_1952                                                                                                     | rgg                                                                          | 0.16638  | -0.01051 | -0.15294 | 1 |
| SPV_1953                                                                                                     | unknown                                                                      | -0.11453 | -0.03681 | 0.08991  | 1 |
| SPV_1954                                                                                                     | unknown                                                                      | 0.00341  | 0.03905  | 0.04779  | 1 |
| SPV_1955                                                                                                     | unknown                                                                      | 0.39446  | 0.11586  | -0.26101 | 1 |
| SPV_1956                                                                                                     | ilvD                                                                         | 0.17668  | 0.05793  | -0.10545 | 1 |
| SPV_1957                                                                                                     | tktC                                                                         | 0.29936  | 0.14594  | -0.13789 | 1 |
| SPV_1958                                                                                                     | tktN                                                                         | 0.01526  | 0.02985  | 0.02941  | 1 |
| SPV_1959                                                                                                     | ulaA2                                                                        | -0.06122 | 0.03127  | 0.10554  | 1 |
| SPV_1960                                                                                                     | ulaB2                                                                        | 0.07449  | 0.04400  | -0.01642 | 1 |
| SPV_1961                                                                                                     | ulaR2                                                                        | 0.22255  | 0.09740  | -0.10698 | 1 |
| SPV_1962, SPV_2438                                                                                           | unknown, unknown                                                             | 0.09741  | 0.09590  | 0.01266  | 1 |
| SPV_1963, SPV_1964                                                                                           | rpmF, rpmG3                                                                  | -2.47969 | -1.38806 | 1.10554  | 1 |
| SPV_1965                                                                                                     | cbpN                                                                         | 0.40956  | -0.00701 | -0.39380 | 1 |
| SPV_1972, SPV_1970, SPV_1969, SPV_2439, SPV_1971                                                             | unknown, unknown, unknown, unknown, unknown                                  | 0.24905  | 0.02902  | -0.20366 | 1 |
| SPV_1973                                                                                                     | unknown                                                                      | 0.14405  | 0.07986  | -0.04886 | 1 |
| SPV_1975, SPV_2442                                                                                           | arcA, srf-26                                                                 | -0.03865 | 0.09446  | 0.14280  | 1 |
| SPV_1976                                                                                                     | arcB                                                                         | 0.13393  | 0.04811  | -0.07909 | 1 |
| SPV_1977                                                                                                     | arcC                                                                         | 0.21196  | 0.05357  | -0.13971 | 1 |
| SPV_1978                                                                                                     | arcD                                                                         | -0.09414 | 0.04325  | 0.16743  | 1 |
| SPV_1979                                                                                                     | unknown                                                                      | 0.02732  | 0.07391  | 0.06132  | 1 |
| SPV_1981                                                                                                     | unknown                                                                      | 0.14608  | 0.13216  | -0.00005 | 1 |
| SPV_1983                                                                                                     | unknown                                                                      | 0.04847  | -0.02724 | -0.06603 | 1 |
| SPV_1984                                                                                                     | ybbK                                                                         | 0.09932  | -0.00011 | -0.08170 | 1 |
| SPV_1988, SPV_1992, SPV_1987, SPV_1989, SPV_1986, SPV_1990, SPV_1995, SPV_1994, SPV_1993, SPV_1985, SPV_1991 | fucY, unknown, fucI, unknown, fucI, unknown, fucK, fucA, fucU, adh2, unknown | 0.09993  | 0.03244  | -0.05720 | 1 |
| SPV_1996                                                                                                     | fucR                                                                         | 0.01039  | 0.05291  | 0.05503  | 1 |
| SPV_1997, SPV_1999, SPV_2000, SPV_1998                                                                       | adcA, adcC, adcR, adcB                                                       | -0.29931 | -0.69201 | -0.37921 | 1 |
| SPV_2002                                                                                                     | dltD                                                                         | 0.15433  | 0.02841  | -0.11070 | 1 |
| SPV_2003                                                                                                     | dltC                                                                         | 0.04035  | 0.02063  | -0.00517 | 1 |
| SPV_2004                                                                                                     | dltB                                                                         | -0.03127 | 0.12333  | 0.16663  | 1 |
| SPV_2005                                                                                                     | dltA                                                                         | 0.04549  | 0.00937  | -0.02770 | 1 |
| SPV_2006                                                                                                     | unknown                                                                      | 0.33243  | -0.02132 | -0.33157 | 1 |
| SPV_2007                                                                                                     | unknown                                                                      | -0.02688 | 0.00490  | 0.04584  | 1 |
| SPV_2008                                                                                                     | unknown                                                                      | -0.13840 | 0.05105  | 0.20253  | 1 |
| SPV_2009                                                                                                     | unknown                                                                      | -0.05194 | 0.12141  | 0.18313  | 1 |
| SPV_2010, SPV_2011, SPV_2012, SPV_2013                                                                       | unknown, glpF, glpO, glpK                                                    | -0.05305 | -0.01773 | 0.04676  | 1 |
| SPV_2014, SPV_2010, SPV_2011, SPV_2012, SPV_2013                                                             | unknown, unknown, glpF, glpO, glpK                                           | -0.01083 | 0.15049  | 0.17370  | 1 |
| SPV_2015, SPV_2016                                                                                           | hslO, unknown                                                                | 0.00239  | -0.27782 | -0.26415 | 1 |
| SPV_2018, SPV_2017                                                                                           | unknown, cbpA                                                                | -0.04136 | 0.07482  | 0.12625  | 1 |
| SPV_2019                                                                                                     | unknown                                                                      | -0.01379 | -0.04818 | -0.01911 | 1 |
| SPV_2020                                                                                                     | unknown                                                                      | 0.00067  | 0.06461  | 0.07978  | 1 |
| SPV_2021                                                                                                     | unknown                                                                      | 0.35805  | -0.14530 | -0.48439 | 1 |
| SPV_2023, SPV_2022                                                                                           | ctsR, clpC                                                                   | -0.06724 | -0.14198 | -0.05750 | 1 |
| SPV_2024, SPV_2026, SPV_2027, SPV_2025                                                                       | thiZ, thiX, unknown, thiY                                                    | 0.08261  | -0.01970 | -0.09214 | 1 |
| SPV_2029                                                                                                     | unknown                                                                      | -0.93675 | 0.11434  | 1.06519  | 1 |
| SPV_2030                                                                                                     | dnaC                                                                         | -2.57753 | -1.44103 | 1.15683  | 1 |
| SPV_2031, SPV_2032                                                                                           | rplI, pde1                                                                   | -3.09541 | -1.89475 | 1.21655  | 1 |
| SPV_2033                                                                                                     | hpf                                                                          | -0.13842 | 0.03345  | 0.18634  | 1 |
| SPV_2034, SPV_2035                                                                                           | comFC, comFA                                                                 | 0.26729  | 0.07673  | -0.17609 | 1 |

|                                                                                |                                                                        |          |          |          |   |
|--------------------------------------------------------------------------------|------------------------------------------------------------------------|----------|----------|----------|---|
| SPV_2036                                                                       | unknown                                                                | -0.15466 | 0.01005  | 0.17559  | 1 |
| SPV_2037                                                                       | cysK                                                                   | -0.01795 | 0.08093  | 0.11674  | 1 |
| SPV_2039                                                                       | unknown                                                                | -0.01066 | 0.04654  | 0.07382  | 1 |
| SPV_2040                                                                       | unknown                                                                | 0.02233  | 0.08305  | 0.07637  | 1 |
| SPV_2041                                                                       | tsf                                                                    | -2.94743 | -1.93990 | 1.02471  | 1 |
| SPV_2042, SPV_2458                                                             | rpsB, srf-30                                                           | -3.63920 | -2.48122 | 1.17186  | 1 |
| SPV_2043                                                                       | pcsB                                                                   | -5.03540 | -3.38934 | 1.65658  | 1 |
| SPV_2044                                                                       | mreD                                                                   | 0.19792  | -0.02291 | -0.20643 | 1 |
| SPV_2045                                                                       | mreC                                                                   | 0.22616  | 0.13504  | -0.07948 | 1 |
| SPV_2046                                                                       | cbiQ                                                                   | 0.31649  | -0.07969 | -0.37873 | 1 |
| SPV_2047                                                                       | cbiO2                                                                  | 0.04266  | -0.05320 | -0.08426 | 1 |
| SPV_2048                                                                       | cbiO1                                                                  | -0.05028 | -0.23861 | -0.18545 | 1 |
| SPV_2050, SPV_2051, SPV_2052, SPV_2049                                         | rodZ, unknown, unknown, pgsA                                           | -0.04013 | -0.05908 | -0.00475 | 1 |
| SPV_2054, SPV_2053                                                             | recF, unknown                                                          | -0.19850 | -0.07077 | 0.14476  | 1 |
| SPV_2055                                                                       | guaB                                                                   | 0.15961  | 0.04325  | -0.10219 | 1 |
| SPV_2056                                                                       | trpS                                                                   | -1.92911 | -1.33385 | 0.61146  | 1 |
| SPV_2057                                                                       | unknown                                                                | -0.12206 | 0.02092  | 0.15334  | 1 |
| SPV_2058                                                                       | unknown                                                                | 0.20918  | 0.02280  | -0.17795 | 1 |
| SPV_2059                                                                       | unknown                                                                | 0.06504  | 0.08513  | 0.03153  | 1 |
| SPV_2060                                                                       | pipR                                                                   | 0.21712  | 0.14190  | -0.06162 | 1 |
| SPV_2061                                                                       | tRNA-Asn-2                                                             | -0.48057 | -0.21273 | 0.28423  | 1 |
| SPV_2062, SPV_2064, SPV_2063, SPV_2065                                         | tRNA-Glu-5, comD, comE, comC1                                          | 0.16162  | 0.07673  | -0.06911 | 1 |
| SPV_2067, SPV_2066                                                             | rlmH, tRNA-Arg-5                                                       | 0.18414  | 0.01026  | -0.15560 | 1 |
| SPV_2068, SPV_2069                                                             | htrA, parB                                                             | 0.04014  | 0.06462  | 0.04105  | 1 |
| SPV_2069                                                                       | parB                                                                   | 0.11099  | 0.09725  | -0.00059 | 1 |
| SPV_2070                                                                       | unknown                                                                | -0.22590 | 0.04244  | 0.28542  | 1 |
| SPV_2073                                                                       | unknown                                                                | 0.02070  | -0.03789 | -0.04004 | 1 |
| SPV_2076                                                                       | unknown                                                                | 0.06413  | 0.03773  | -0.01273 | 1 |
| SPV_2078                                                                       | ccnC                                                                   | -0.15049 | 0.28481  | 0.44213  | 1 |
| SPV_2078, SPV_0024                                                             | ccnC, purA                                                             | 0.17133  | 0.05362  | -0.10440 | 1 |
| SPV_2078, SPV_0024, SPV_0023                                                   | ccnC, purA, comW                                                       | -0.06784 | 0.06249  | 0.14556  | 1 |
| SPV_2081                                                                       | srf-01                                                                 | 0.09793  | -0.04613 | -0.12603 | 1 |
| SPV_2082                                                                       | unknown                                                                | -0.08222 | -0.04431 | 0.05335  | 1 |
| SPV_2084                                                                       | srf-02                                                                 | 0.14186  | 0.06336  | -0.06391 | 1 |
| SPV_2085                                                                       | unknown                                                                | -0.09444 | 0.09976  | 0.21156  | 1 |
| SPV_2086, SPV_0049, SPV_0050                                                   | srf-03, comA, comB                                                     | 0.06014  | -0.02277 | -0.06171 | 1 |
| SPV_2087                                                                       | unknown                                                                | -0.03076 | 0.12536  | 0.16910  | 1 |
| SPV_2088                                                                       | unknown                                                                | 0.09442  | 0.01091  | -0.06647 | 1 |
| SPV_2089                                                                       | unknown                                                                | 0.09878  | 0.08000  | -0.00515 | 1 |
| SPV_2090                                                                       | unknown                                                                | 0.01679  | 0.00571  | -0.00212 | 1 |
| SPV_2091                                                                       | unknown                                                                | 0.09522  | 0.05333  | -0.02363 | 1 |
| SPV_2092                                                                       | unknown                                                                | 0.25479  | 0.06769  | -0.17952 | 1 |
| SPV_2096                                                                       | unknown                                                                | 0.08898  | -0.01190 | -0.08330 | 1 |
| SPV_2100                                                                       | unknown                                                                | 0.32325  | 0.02447  | -0.28537 | 1 |
| SPV_2102, SPV_0120, SPV_0123, SPV_0119, SPV_2103, SPV_0122, SPV_0121, SPV_0124 | unknown, unknown, unknown, unknown, unknown, unknown, unknown, unknown | 0.05579  | 0.02536  | -0.01356 | 1 |
| SPV_2104                                                                       | unknown                                                                | 0.11393  | 0.03358  | -0.06559 | 1 |
| SPV_2109, SPV_0132                                                             | cibC, cibB                                                             | -0.01738 | 0.04863  | 0.07962  | 1 |
| SPV_2109, SPV_0132, SPV_0133                                                   | cibC, cibB, cibA                                                       | -0.02959 | 0.03555  | 0.07713  | 1 |
| SPV_2110                                                                       | unknown                                                                | 0.07543  | -0.04947 | -0.10894 | 1 |
| SPV_2113                                                                       | unknown                                                                | 0.01046  | -0.01066 | -0.00367 | 1 |
| SPV_2115                                                                       | unknown                                                                | 0.36538  | 0.01880  | -0.32801 | 1 |
| SPV_2116                                                                       | unknown                                                                | -0.01002 | 0.20557  | 0.22847  | 1 |
| SPV_2117                                                                       | unknown                                                                | -0.23119 | 0.03450  | 0.27623  | 1 |
| SPV_2119                                                                       | srf-05                                                                 | 0.21693  | 0.01212  | -0.19357 | 1 |
| SPV_2120                                                                       | srf-06                                                                 | -0.21151 | 0.08862  | 0.31203  | 1 |
| SPV_2121, SPV_0186                                                             | unknown, unknown                                                       | 0.05898  | -0.19872 | -0.24939 | 1 |
| SPV_2125                                                                       | ccnE                                                                   | 0.19576  | 0.14442  | -0.03573 | 1 |
| SPV_2126                                                                       | unknown                                                                | -0.01703 | 0.06420  | 0.09582  | 1 |
| SPV_2127                                                                       | unknown                                                                | -0.13101 | 0.10743  | 0.25480  | 1 |
| SPV_2129                                                                       | ccnA                                                                   | 0.11379  | 0.07206  | -0.02396 | 1 |
| SPV_2130                                                                       | ccnB                                                                   | -0.09168 | 0.09752  | 0.20218  | 1 |
| SPV_2131                                                                       | srf-07                                                                 | 0.18018  | 0.02570  | -0.13826 | 1 |
| SPV_2132                                                                       | unknown                                                                | -0.00682 | 0.04314  | 0.06023  | 1 |
| SPV_2133                                                                       | ccnD                                                                   | 0.15606  | 0.04434  | -0.09697 | 1 |

|                                                            |                                             |          |          |          |   |
|------------------------------------------------------------|---------------------------------------------|----------|----------|----------|---|
| SPV_2134                                                   | unknown                                     | -0.00759 | 0.02250  | 0.04081  | 1 |
| SPV_2135                                                   | unknown                                     | 0.22801  | 0.03817  | -0.17475 | 1 |
| SPV_2137                                                   | unknown                                     | 0.30642  | 0.06304  | -0.22676 | 1 |
| SPV_2139                                                   | srf-08                                      | -0.05177 | 0.14059  | 0.20396  | 1 |
| SPV_2140, SPV_0288                                         | NA, unknown                                 | 0.47023  | 0.00983  | -0.44583 | 1 |
| SPV_2141                                                   | unknown                                     | -0.05983 | 0.18740  | 0.26787  | 1 |
| SPV_2142                                                   | unknown                                     | 0.01729  | 0.12654  | 0.12166  | 1 |
| SPV_2144                                                   | unknown                                     | -0.31089 | -0.46096 | -0.13244 | 1 |
| SPV_2146                                                   | unknown                                     | -0.12872 | -0.41871 | -0.27058 | 1 |
| SPV_2157, SPV_0391                                         | ydil, briC                                  | 0.12631  | 0.03198  | -0.07579 | 1 |
| SPV_2158                                                   | unknown                                     | -0.01904 | 0.12660  | 0.16194  | 1 |
| SPV_2160                                                   | unknown                                     | 0.11136  | 0.14701  | 0.04960  | 1 |
| SPV_2163                                                   | unknown                                     | 0.08046  | 0.09937  | 0.03515  | 1 |
| SPV_2164                                                   | unknown                                     | 0.05399  | 0.16174  | 0.12173  | 1 |
| SPV_2165                                                   | unknown                                     | 0.12553  | 0.03926  | -0.07027 | 1 |
| SPV_2166                                                   | unknown                                     | -0.25476 | 0.29274  | 0.62094  | 1 |
| SPV_2167                                                   | srf-09                                      | -0.30198 | -0.11629 | 0.20408  | 1 |
| SPV_2168                                                   | unknown                                     | 0.02902  | 0.01595  | 0.00124  | 1 |
| SPV_2169                                                   | unknown                                     | 0.11780  | -0.00820 | -0.11898 | 1 |
| SPV_2178                                                   | unknown                                     | -0.11391 | -0.08321 | 0.04178  | 1 |
| SPV_2185                                                   | srf-10                                      | 0.14744  | 0.02712  | -0.11042 | 1 |
| SPV_2185, SPV_0500                                         | srf-10, unknown                             | -0.08696 | 0.08043  | 0.18345  | 1 |
| SPV_2188                                                   | unknown                                     | 0.32508  | 0.01678  | -0.29846 | 1 |
| SPV_2189                                                   | unknown                                     | 0.12218  | 0.04154  | -0.06549 | 1 |
| SPV_2192                                                   | unknown                                     | 0.13540  | 0.06458  | -0.05633 | 1 |
| SPV_2193                                                   | unknown                                     | 0.25019  | 0.14053  | -0.09444 | 1 |
| SPV_2200                                                   | srf-11                                      | 0.13383  | 0.05368  | -0.07054 | 1 |
| SPV_2201                                                   | unknown                                     | -0.11498 | -0.01446 | 0.11287  | 1 |
| SPV_2202                                                   | unknown                                     | 0.20744  | -0.00563 | -0.19797 | 1 |
| SPV_2203                                                   | unknown                                     | 0.08902  | 0.00836  | -0.06253 | 1 |
| SPV_2205                                                   | unknown                                     | -0.15212 | 0.05158  | 0.21898  | 1 |
| SPV_2213                                                   | unknown                                     | -0.32036 | -0.24201 | 0.09191  | 1 |
| SPV_2218, SPV_0673                                         | unknown, unknown                            | -0.27957 | 0.09509  | 0.38346  | 1 |
| SPV_2219                                                   | unknown                                     | -0.03395 | 0.04129  | 0.08573  | 1 |
| SPV_2220                                                   | unknown                                     | -0.13951 | -0.16811 | -0.01389 | 1 |
| SPV_2226                                                   | srf-12                                      | 0.01968  | 0.03104  | 0.02492  | 1 |
| SPV_2227                                                   | unknown                                     | 0.04859  | 0.00696  | -0.02834 | 1 |
| SPV_2238, SPV_0781, SPV_0778                               | unknown, unknown, unknown                   | 0.01896  | 0.02621  | 0.01900  | 1 |
| SPV_2239                                                   | unknown                                     | -0.01309 | -0.04284 | -0.01754 | 1 |
| SPV_2240                                                   | unknown                                     | 0.23059  | 0.03251  | -0.17656 | 1 |
| SPV_2242                                                   | unknown                                     | 0.17666  | 0.00592  | -0.15849 | 1 |
| SPV_2244                                                   | unknown                                     | 0.16528  | 0.03098  | -0.12133 | 1 |
| SPV_2245                                                   | unknown                                     | 0.10478  | 0.07166  | -0.01755 | 1 |
| SPV_2246                                                   | unknown                                     | 0.15533  | 0.08495  | -0.06155 | 1 |
| SPV_2247                                                   | srf-13                                      | 0.16417  | -0.05166 | -0.20696 | 1 |
| SPV_2249, SPV_0817                                         | unknown, unknown                            | 0.20216  | 0.03022  | -0.15790 | 1 |
| SPV_2250                                                   | unknown                                     | -0.19150 | 0.06191  | 0.26765  | 1 |
| SPV_2251                                                   | unknown                                     | -0.06796 | 0.08097  | 0.16160  | 1 |
| SPV_2257, SPV_0846, SPV_0844, SPV_2256, SPV_0843           | unknown, unknown, comEC, unknown, comEA     | -0.00787 | 0.04696  | 0.05431  | 1 |
| SPV_2257, SPV_0846, SPV_2256                               | unknown, unknown, unknown                   | 0.03433  | 0.07888  | 0.06371  | 1 |
| SPV_2258                                                   | srf-14                                      | -3.71015 | -2.60907 | 1.11507  | 1 |
| SPV_2259                                                   | rpmG1                                       | -0.05300 | -0.08555 | -0.01647 | 1 |
| SPV_2260                                                   | unknown                                     | 0.09863  | 0.00626  | -0.07374 | 1 |
| SPV_2265, SPV_0888                                         | phtD, lmb                                   | -0.06977 | 0.13178  | 0.21412  | 1 |
| SPV_2266                                                   | dhaM                                        | 0.30949  | 0.01262  | -0.28219 | 1 |
| SPV_2267                                                   | unknown                                     | -0.08881 | 0.01783  | 0.11955  | 1 |
| SPV_2270                                                   | srf-15                                      | -3.81885 | -2.68678 | 1.14270  | 1 |
| SPV_2274                                                   | unknown                                     | 0.21205  | -0.05805 | -0.25621 | 1 |
| SPV_2278                                                   | unknown                                     | 0.09432  | 0.07577  | -0.00180 | 1 |
| SPV_2279                                                   | unknown                                     | 0.07908  | 0.01963  | -0.04131 | 1 |
| SPV_2282                                                   | shp                                         | 0.13889  | 0.13934  | 0.01568  | 1 |
| SPV_2283                                                   | unknown                                     | 0.22420  | 0.06034  | -0.14943 | 1 |
| SPV_2285, SPV_0931, SPV_0930                               | unknown, pezT, pezA                         | -0.49415 | 0.31523  | 0.82404  | 1 |
| SPV_2287, SPV_2285, SPV_0931, SPV_2286, SPV_0930           | unknown, unknown, pezT, unknown, pezA       | 0.37259  | -0.01259 | -0.36652 | 1 |
| SPV_2287, SPV_2285, SPV_0931, SPV_2286, SPV_0930, SPV_0927 | unknown, unknown, pezT, unknown, pezA, nplT | 0.14491  | 0.07698  | -0.05206 | 1 |

|                                                            |                                          |          |          |          |   |
|------------------------------------------------------------|------------------------------------------|----------|----------|----------|---|
| SPV_2288, SPV_0918, SPV_0919, SPV_0917, SPV_0915, SPV_0916 | unknown, piaD, unknown, piaC, piaA, piaB | 0.21826  | 0.09242  | -0.11515 | 1 |
| SPV_2289                                                   | unknown                                  | -0.03383 | 0.03877  | 0.08634  | 1 |
| SPV_2290                                                   | unknown                                  | 0.00461  | 0.06967  | 0.08031  | 1 |
| SPV_2291                                                   | srf-16                                   | -0.14460 | 0.03787  | 0.19306  | 1 |
| SPV_2292                                                   | srf-17                                   | 0.11703  | 0.04265  | -0.06579 | 1 |
| SPV_2293                                                   | phtF                                     | 0.18354  | 0.05667  | -0.11006 | 1 |
| SPV_2297                                                   | phtB                                     | 0.30780  | 0.02589  | -0.26963 | 1 |
| SPV_2298                                                   | unknown                                  | 0.06931  | 0.02402  | -0.03085 | 1 |
| SPV_2299                                                   | unknown                                  | 0.09629  | -0.00168 | -0.08420 | 1 |
| SPV_2304                                                   | unknown                                  | 0.20171  | 0.01814  | -0.18142 | 1 |
| SPV_2309                                                   | unknown                                  | 0.00371  | 0.07994  | 0.08357  | 1 |
| SPV_2310                                                   | unknown                                  | 0.22823  | 0.01384  | -0.20042 | 1 |
| SPV_2311                                                   | unknown                                  | 0.09261  | -0.04083 | -0.12043 | 1 |
| SPV_2314                                                   | unknown                                  | -0.11357 | -0.06839 | 0.05911  | 1 |
| SPV_2315                                                   | unknown                                  | 0.35807  | -0.03087 | -0.36704 | 1 |
| SPV_2317                                                   | srf-19                                   | 0.11392  | 0.15730  | 0.05804  | 1 |
| SPV_2318                                                   | unknown                                  | 0.41899  | 0.06856  | -0.33994 | 1 |
| SPV_2319                                                   | unknown                                  | 0.24129  | -0.01516 | -0.24273 | 1 |
| SPV_2320                                                   | unknown                                  | 0.01647  | -0.01530 | -0.01708 | 1 |
| SPV_2325                                                   | unknown                                  | 0.37519  | 0.00464  | -0.35456 | 1 |
| SPV_2326                                                   | unknown                                  | 0.27851  | 0.01493  | -0.24900 | 1 |
| SPV_2332                                                   | unknown                                  | 0.26767  | -0.08778 | -0.34138 | 1 |
| SPV_2333                                                   | unknown                                  | -0.17010 | -0.06793 | 0.11508  | 1 |
| SPV_2337                                                   | unknown                                  | 0.12716  | 0.06418  | -0.04703 | 1 |
| SPV_2340, SPV_1309, SPV_1308                               | unknown, pgdA, unknown                   | 0.13633  | -0.02680 | -0.15177 | 1 |
| SPV_2349                                                   | unknown                                  | 0.08464  | 0.04162  | -0.02754 | 1 |
| SPV_2351                                                   | msbA                                     | -0.04609 | 0.12670  | 0.18217  | 1 |
| SPV_2362                                                   | unknown                                  | 0.14666  | 0.01543  | -0.11578 | 1 |
| SPV_2363                                                   | unknown                                  | 0.19989  | 0.01847  | -0.16462 | 1 |
| SPV_2364                                                   | unknown                                  | 0.10335  | 0.17071  | 0.08115  | 1 |
| SPV_2365, SPV_1444                                         | unknown, thrS                            | -3.21358 | -1.92598 | 1.30251  | 1 |
| SPV_2366                                                   | unknown                                  | 0.10714  | 0.01981  | -0.07336 | 1 |
| SPV_2367                                                   | unknown                                  | -0.08402 | 0.05141  | 0.14569  | 1 |
| SPV_2370, SPV_2369                                         | unknown, unknown                         | 0.07655  | 0.13915  | 0.08321  | 1 |
| SPV_2371                                                   | unknown                                  | 0.06062  | 0.15096  | 0.10521  | 1 |
| SPV_2372                                                   | unknown                                  | -0.02925 | -0.02607 | 0.01655  | 1 |
| SPV_2373                                                   | unknown                                  | 0.10515  | 0.08012  | -0.01442 | 1 |
| SPV_2377                                                   | unknown                                  | 0.07676  | 0.03218  | -0.03218 | 1 |
| SPV_2378                                                   | srf-21                                   | 0.35745  | 0.10559  | -0.23527 | 1 |
| SPV_2381                                                   | unknown                                  | 0.22952  | -0.05543 | -0.27164 | 1 |
| SPV_2382                                                   | unknown                                  | 0.15725  | 0.00427  | -0.13453 | 1 |
| SPV_2384                                                   | unknown                                  | 0.39623  | -0.03628 | -0.41466 | 1 |
| SPV_2388                                                   | unknown                                  | -0.13421 | -0.01897 | 0.12821  | 1 |
| SPV_2389                                                   | unknown                                  | 0.41194  | -0.14951 | -0.53090 | 1 |
| SPV_2391                                                   | hicA                                     | 0.33831  | 0.04532  | -0.27682 | 1 |
| SPV_2392, SPV_1581                                         | ssrS, tRNA-Lys-1                         | -0.01924 | 0.16425  | 0.19663  | 1 |
| SPV_2395                                                   | unknown                                  | 0.27336  | -0.00112 | -0.26068 | 1 |
| SPV_2398, SPV_2397                                         | unknown, unknown                         | 0.06350  | 0.05465  | 0.00476  | 1 |
| SPV_2407                                                   | unknown                                  | 0.18801  | 0.03832  | -0.13670 | 1 |
| SPV_2408                                                   | unknown                                  | -0.05812 | 0.07026  | 0.14008  | 1 |
| SPV_2411                                                   | unknown                                  | 0.20903  | 0.10270  | -0.09438 | 1 |
| SPV_2414                                                   | unknown                                  | 0.07109  | -0.01547 | -0.07541 | 1 |
| SPV_2416                                                   | unknown                                  | 0.03991  | -0.02222 | -0.04806 | 1 |
| SPV_2417                                                   | unknown                                  | 0.24016  | 0.04085  | -0.17644 | 1 |
| SPV_2418                                                   | unknown                                  | -0.01027 | 0.10436  | 0.12611  | 1 |
| SPV_2419                                                   | unknown                                  | 0.12982  | 0.11386  | -0.00460 | 1 |
| SPV_2422                                                   | unknown                                  | -0.01620 | -0.11903 | -0.09272 | 1 |
| SPV_2423                                                   | rpmG2                                    | -1.60897 | -1.06610 | 0.56021  | 1 |
| SPV_2432                                                   | unknown                                  | 0.00505  | -0.00743 | 0.00216  | 1 |
| SPV_2433, SPV_1902                                         | srf-24, patA                             | 0.23631  | -0.01811 | -0.23973 | 1 |
| SPV_2434                                                   | unknown                                  | 0.27611  | -0.00455 | -0.25248 | 1 |
| SPV_2436                                                   | srf-25                                   | 0.14635  | -0.01037 | -0.14397 | 1 |
| SPV_2437                                                   | unknown                                  | -0.12156 | 0.01325  | 0.14387  | 1 |
| SPV_2441, SPV_1974                                         | unknown, unknown                         | 0.10864  | -0.01171 | -0.09778 | 1 |
| SPV_2446                                                   | unknown                                  | 0.30421  | 0.04522  | -0.24504 | 1 |
| SPV_2448                                                   | unknown                                  | -0.05683 | 0.09947  | 0.17221  | 1 |
| SPV_2450                                                   | unknown                                  | -0.09339 | -0.00072 | 0.10465  | 1 |

|                    |              |          |          |          |   |
|--------------------|--------------|----------|----------|----------|---|
| SPV_2453           | unknown      | -0.02334 | -0.08015 | -0.04197 | 1 |
| SPV_2454, SPV_2028 | srf-29, cbpD | 0.23700  | 0.00137  | -0.22093 | 1 |
| SPV_2455           | unknown      | 0.13076  | 0.10157  | -0.01370 | 1 |

## Supplementary References

1. van Raaphorst, R., Kjos, M. & Veening, J.-W. Chromosome segregation drives division site selection in *Streptococcus pneumoniae*. *Proc. Natl. Acad. Sci. U. S. A.* **114**, E5959–E5968 (2017).
2. Keller, L. E. *et al.* Three New Integration Vectors and Fluorescent Proteins for Use in the Opportunistic Human Pathogen *Streptococcus pneumoniae*. *Genes (Basel)*. **10**, 394 (2019).
3. Liu, X. *et al.* High-throughput CRISPRi phenotyping identifies new essential genes in *Streptococcus pneumoniae*. *Mol. Syst. Biol.* **13**, 931 (2017).
4. Gibson, D. G. *et al.* Enzymatic assembly of DNA molecules up to several hundred kilobases. *Nat. Methods* **6**, 343–345 (2009).
5. Sorg, R. A., Kuipers, O. P. & Veening, J.-W. Gene Expression Platform for Synthetic Biology in the Human Pathogen *Streptococcus pneumoniae*. *ACS Synth. Biol.* **4**, 228–239 (2015).
6. Engler, C., Kandzia, R. & Marillonnet, S. A one pot, one step, precision cloning method with high throughput capability. *PLoS One* **3**, e3647 (2008).
7. Mercy, C. *et al.* RocS drives chromosome segregation and nucleoid protection in *Streptococcus pneumoniae*. *Nat. Microbiol.* **4**, 1661–1670 (2019).
8. Hoskins, J. *et al.* Genome of the bacterium *Streptococcus pneumoniae* strain R6. *J. Bacteriol.* **183**, 5709–17 (2001).
9. Tettelin, H. *et al.* Complete genome sequence of a virulent isolate of *Streptococcus pneumoniae*. *Science* **293**, 498–506 (2001).
10. Sorg, R. A. *et al.* Collective Resistance in Microbial Communities by Intracellular Antibiotic Deactivation. *PLOS Biol.* **14**, e2000631 (2016).
11. O’Neil, P., Lovell, S., Mehzabeen, N., Battaile, K. & Biswas, I. Crystal structure of histone-like protein from *Streptococcus mutans* refined to 1.9 Å resolution. *Acta Crystallogr. Sect. F, Struct. Biol. Commun.* **72**, 257–62 (2016).
12. Stamsås, G. A. *et al.* CozEa and CozEb play overlapping and essential roles in controlling cell division in *Staphylococcus aureus*. *Mol. Microbiol.* **109**, 615–632 (2018).
13. Liu, X. *et al.* Exploration of Bacterial Bottlenecks and *Streptococcus pneumoniae* Pathogenesis by CRISPRi-Seq. *Cell Host Microbe* **29**, 107-120.e6 (2021).
14. Diebold-Durand, M. L., Bürmann, F. & Gruber, S. High-throughput allelic replacement screening in *Bacillus subtilis*. in *Methods in Molecular Biology* vol. 2004 49–61 (Humana Press Inc., 2019).
15. Youngman, P. *et al.* Methods for genetic manipulation, cloning and functional analysis of sporulation genes in *Bacillus subtilis*. (1989).
16. Hassan, A. K. *et al.* Suppression of initiation defects of chromosome replication in *Bacillus subtilis* dnaA and oriC-deleted mutants by integration of a plasmid replicon into the chromosomes. *J. Bacteriol.* **179**, 2494–502 (1997).
17. Yansura, D. G. & Henner, D. J. Use of the *Escherichia coli* lac repressor and operator to control gene expression in *Bacillus subtilis*. *Proc. Natl. Acad. Sci. U. S. A.* **81**, 439–43 (1984).
18. Lemon, K. P., Kurtser, I. & Grossman, A. D. Effects of replication termination mutants on chromosome partitioning in *Bacillus subtilis*. *Proc. Natl. Acad. Sci. U. S. A.* **98**, 212–7 (2001).
19. Avery, O. T., Macleod, C. M. & McCarty, M. Studies on the chemical nature of the substance inducing transformation of pneumococcal types : induction of transformation by a desoxyribonucleic acid fraction isolated from pneumococcus type III. *J. Exp. Med.* **79**, 137–58

- (1944).
20. Tettelin, H. *et al.* Complete genome sequence of a virulent isolate of *Streptococcus pneumoniae*. *Science (80-. )*. **293**, 498–506 (2001).
  21. Kjos, M. *et al.* Bright fluorescent *Streptococcus pneumoniae* for live-cell imaging of host-pathogen interactions. *J. Bacteriol.* **197**, 807–18 (2015).
  22. Horsburgh, M. J. *et al.* sigmaB modulates virulence determinant expression and stress resistance: characterization of a functional rsbU strain derived from *Staphylococcus aureus* 8325-4. *J. Bacteriol.* **184**, 5457–67 (2002).
  23. Perego, M., Spiegelman, G. B. & Hoch, J. A. Structure of the gene for the transition state regulator, abrB: regulator synthesis is controlled by the spo0A sporulation gene in *Bacillus subtilis*. *Mol. Microbiol.* **2**, 689–699 (1988).
  24. Keller, L. E., Rueff, A. S., Kurushima, J. & Veening, J. W. Three new integration vectors and fluorescent proteins for use in the opportunistic human pathogen *Streptococcus pneumoniae*. *Genes (Basel)*. **10**, (2019).
  25. Hassan, A. K. *et al.* Suppression of initiation defects of chromosome replication in *Bacillus subtilis* dnaA and oriC-deleted mutants by integration of a plasmid replicon into the chromosomes. *J. Bacteriol.* **179**, 2494–502 (1997).
  26. Ouellette, S. P. *et al.* Analysis of MreB interactors in *Chlamydia* reveals a RodZ homolog but fails to detect an interaction with MraY. *Front. Microbiol.* **5**, 279 (2014).
  27. Monk, I. R., Tree, J. J., Howden, B. P., Stinear, T. P. & Foster, T. J. Complete Bypass of Restriction Systems for Major *Staphylococcus aureus* Lineages. *MBio* **6**, e00308-15 (2015).
